# Supplementary material for: Validation of the Dutch language version of the Safety Attitudes Questionnaire (SAQ-NL)
Source: BMC Health Serv Res. 2016 Aug 15;16:385. doi: 10.1186/s12913-016-1648-3 (PMC4986249; doi:10.1186/s12913-016-1648-3)
Supplement: Additional file 2: — Research Dataset. (XLSX 687 kb) [file 12913_2016_1648_MOESM2_ESM.xlsx]

## Sheet: Hersteld_Blad1
ID	Meting	OrganisatieID	academicstatus	AfdelingID	Aanmaakdatum	Type	Online	Converted	Functie	medicofsupport	TijdAfdeling	TijdZiekenhuis	Geslacht	Leeftijd	V1	V2	V2_om	V3	V4	V5	V6	V7	V8	V9	V10	V11	V11_om	V12	V13	V14	V15	V16	V17	V18	V19	V20	V21	V22	V23	V24	V25	V26	V27	V28	V29	V30	M_TWC	M_SC	M_JS
1	102	1	1	2		1	0	1	2	1	4	2	1	4	4	2	4	4	4	4	2	4	4	4	4	2	4	4	3	4	3	#NULL!	4	3	4	2	2	2	4	5	3	4	4	4	4	4	3.66667	3.85714	3.5
2	103	2	2	3		1	0	1	3	2	1	3	2	1	4	2	4	3	3	3	4	3	4	4	4	3	3	3	2	4	4	#NULL!	3	3	4	4	2	2	2	4	3	3	4	3	2	2	3.5	3.28571	3.5
4	104	3	1	2		1	0	1	3	2	4	4	1	5	2	3	3	4	4	4	3	4	3	3	2	3	3	3	3	3	4	#NULL!	4	2	3	3	3	3	3	4	3	2	1	5	3	5	3.33333	3	3.25
5	100	1	1	1		1	0	1	4	#NULL!	3	4	1	2	4	3	3	4	4	4	4	3	3	3	4	4	2	3	3	4	3	#NULL!	4	4	2	3	2	2	3	3	3	4	4	3	3	4	3.83333	3	3.75
7	102	1	1	2		1	0	1	2	1	2	2	1	3	4	3	3	4	4	4	4	3	4	3	3	4	2	4	3	4	3	#NULL!	3	4	4	3	3	3	3	4	3	3	3	3	4	3	3.83333	3.14286	3.5
8	103	2	2	3		1	0	1	4	#NULL!	1	3	1	1	3	3	3	2	3	3	4	4	3	1	3	2	4	3	4	5	3	#NULL!	4	4	3	3	2	4	2	4	4	4	3	4	2	2	3	3.14286	4
10	104	3	1	2		1	0	1	3	2	4	4	2	5	3	2	4	3	4	4	3	4	3	4	4	3	3	4	3	3	3	#NULL!	4	4	3	2	3	3	4	4	2	3	3	4	2	4	3.5	3.57143	3.5
11	100	1	1	1		1	0	1	3	2	2	3	2	2	3	3	3	3	3	4	4	3	3	2	4	2	4	3	2	4	3	#NULL!	4	3	2	3	2	2	2	5	2	2	4	3	3	4	3.33333	3	3.5
13	102	1	1	2		1	0	1	2	1	4	3	1	4	4	2	4	4	4	3	4	3	3	2	2	2	4	3	4	4	3	#NULL!	4	4	4	4	3	5	2	4	2	3	3	1	3	2	3.83333	3	3.75
14	103	2	2	3		1	0	1	3	2	1	3	2	1	4	2	4	4	4	4	4	4	4	4	4	2	4	4	4	4	4	#NULL!	4	3	4	3	3	3	4	4	3	4	3	3	2	3	4	4	3.75
16	104	3	1	2		1	0	1	2	1	3	3	1	4	4	3	3	3	4	4	3	4	4	4	4	2	4	3	3	4	3	#NULL!	4	4	3	3	1	3	3	3	3	4	3	3	4	4	3.5	3.71429	3.75
17	100	1	1	1		1	0	1	3	2	4	4	1	4	4	4	2	4	4	4	4	4	3	4	3	2	4	3	2	4	4	#NULL!	4	4	3	3	2	2	4	4	3	4	4	4	4	4	3.66667	3.28571	4
19	102	1	1	2		1	0	1	2	1	3	3	1	5	4	1	5	4	3	4	5	4	4	5	3	2	4	3	4	5	3	#NULL!	5	5	2	3	3	3	3	4	3	4	3	2	4	3	4.16667	3.85714	4.5
20	103	2	2	3		1	0	1	4	#NULL!	1	4	2	1	4	3	3	3	5	4	4	5	4	4	4	2	4	4	4	4	2	#NULL!	4	4	5	4	5	4	3	4	4	4	5	4	1	3	3.83333	4.14286	3.5
22	104	3	1	2		1	0	1	1	1	1	1	2	2	4	3	3	3	4	4	4	4	4	2	3	2	4	3	4	3	3	#NULL!	3	3	4	3	4	3	3	3	3	3	3	4	3	4	3.66667	3.42857	3
23	100	1	1	1		1	0	1	3	2	4	4	2	5	4	4	2	3	2	3	1	4	4	4	3	4	2	2	3	3	3	#NULL!	4	2	3	3	4	2	3	4	1	4	4	3	3	3	2.5	3.14286	3
25	102	1	1	2		1	0	1	2	1	2	2	2	3	4	1	5	5	5	5	4	5	5	5	4	1	5	4	5	5	4	#NULL!	3	5	3	3	4	4	3	4	4	4	2	3	3	4	4.66667	4.71429	4.25
26	103	2	2	3		1	0	1	4	#NULL!	1	4	1	1	3	3	3	3	3	3	3	3	4	3	3	3	3	3	3	4	3	#NULL!	4	4	4	2	3	2	3	4	3	3	4	3	3	3	3	3.14286	3.75
28	104	3	1	2		1	0	1	3	2	2	2	2	2	3	3	3	3	4	4	3	4	2	3	4	2	4	2	3	3	3	#NULL!	3	3	2	3	2	2	2	4	3	2	2	2	3	3	3.33333	3.14286	3
29	100	1	1	1		1	0	1	3	2	4	4	2	3	3	4	2	3	4	4	4	3	4	3	2	4	2	3	4	4	3	#NULL!	4	3	3	2	3	3	3	3	3	3	4	3	3	3	3.33333	3	3.5
31	102	1	1	2		1	0	1	2	1	3	3	1	4	5	2	4	4	4	5	4	4	4	4	3	1	5	3	4	5	3	#NULL!	4	4	3	4	3	4	3	4	3	2	2	4	4	4	4.33333	3.85714	4
32	103	2	2	3		1	0	1	4	#NULL!	1	4	1	1	4	2	4	3	3	4	4	4	4	4	4	2	4	4	4	4	3	#NULL!	4	3	3	2	3	3	3	3	3	4	4	3	3	3	3.66667	4	3.5
34	104	3	1	2		1	0	1	1	1	2	1	2	3	4	2	4	2	4	3	3	2	3	3	3	2	4	3	3	4	3	#NULL!	4	3	3	4	3	3	2	3	2	2	3	3	4	3	3.33333	3	3.5
35	100	1	1	1		1	0	1	3	2	4	3	1	3	3	2	4	3	4	4	3	4	4	4	3	3	3	3	3	4	3	#NULL!	4	3	5	4	3	4	3	3	3	3	3	3	3	3	3.5	3.42857	3.5
37	102	1	1	2		1	0	1	2	1	4	4	1	5	5	2	4	4	4	4	3	4	4	4	3	2	4	4	4	4	3	#NULL!	4	3	3	3	2	4	3	4	3	2	2	3	4	4	4	3.85714	3.5
38	103	2	2	3		1	0	1	#NULL!	#NULL!	1	1	1	1	4	1	5	3	3	3	4	5	3	3	4	3	3	3	5	4	3	#NULL!	4	5	2	5	3	2	3	3	3	4	5	5	1	2	3.66667	3.71429	4
40	104	3	1	2		1	0	1	2	1	1	1	1	2	4	2	4	3	4	4	5	4	4	3	4	2	4	4	4	5	3	#NULL!	5	5	3	2	3	3	4	4	3	4	4	4	4	4	4	3.85714	4.5
41	100	1	1	1		1	0	1	3	2	3	4	1	4	3	3	3	3	4	4	3	3	3	4	3	4	2	3	2	3	3	#NULL!	3	3	3	3	3	3	2	3	3	3	4	3	2	3	3.33333	2.85714	3
43	102	1	1	2		1	0	1	2	1	4	4	1	4	4	2	4	4	4	4	3	4	4	3	4	2	4	4	4	3	3	#NULL!	4	3	3	3	3	3	2	3	3	3	5	4	4	4	3.83333	3.85714	3.25
44	103	2	2	3		1	0	1	4	#NULL!	1	2	2	2	4	3	3	3	4	3	4	4	3	4	3	2	4	3	4	5	3	#NULL!	5	4	3	3	2	2	3	4	3	4	4	4	3	2	3.5	3.57143	4.25
46	104	3	1	2		1	0	1	3	2	4	4	2	5	3	1	5	4	4	4	3	5	3	4	2	2	4	3	3	3	4	#NULL!	3	3	1	2	2	4	2	4	3	3	3	5	3	5	3.83333	3.42857	3.25
47	100	1	1	1		1	0	1	3	2	2	2	2	4	4	3	3	3	4	4	4	3	3	4	3	3	3	3	4	5	3	#NULL!	5	3	3	2	2	4	4	3	3	4	3	3	4	3	3.66667	3.28571	4
49	102	1	1	2		1	0	1	2	1	1	1	1	3	4	2	4	3	4	4	5	3	4	3	3	2	4	3	3	5	3	#NULL!	5	4	3	3	3	3	4	4	3	3	3	3	4	4	4	3.28571	4.25
50	103	2	2	3		1	0	1	3	2	1	2	2	1	4	2	4	4	4	4	4	4	4	4	4	2	4	4	4	4	3	#NULL!	3	4	3	3	3	4	4	3	2	4	4	3	2	3	4	4	3.5
52	104	3	1	2		1	0	1	3	2	3	3	1	3	4	3	3	3	3	4	3	4	4	3	2	3	3	3	3	4	4	#NULL!	4	2	2	3	2	3	4	5	3	4	4	3	4	4	3.33333	3.14286	3.5
53	100	1	1	1		1	0	1	3	2	4	4	2	4	4	2	4	4	4	4	4	4	4	4	4	2	4	4	2	4	4	#NULL!	4	4	3	3	2	2	4	3	4	4	4	4	4	4	4	3.71429	4
55	102	1	1	2		1	0	1	2	1	4	2	1	4	3	2	4	3	3	4	3	4	3	3	3	3	3	3	3	3	3	#NULL!	5	3	3	3	3	3	3	3	3	3	3	3	3	3	3.33333	3.14286	3.5
56	103	2	2	3		1	0	1	3	2	1	2	2	1	4	3	3	3	4	4	4	4	3	3	4	2	4	3	4	3	3	#NULL!	3	3	4	3	3	4	3	3	2	3	4	3	3	2	3.66667	3.57143	3
58	104	3	1	2		1	0	1	3	2	1	1	2	1	4	3	3	3	4	4	4	4	4	3	3	3	3	4	3	4	4	#NULL!	5	4	3	3	3	3	3	4	4	4	3	3	3	4	3.66667	3.42857	4.25
59	100	1	1	1		1	0	1	3	2	3	3	2	3	2	3	3	3	4	4	3	3	3	4	3	3	3	3	2	4	3	#NULL!	3	2	3	3	2	3	2	4	1	3	4	3	3	2	3.16667	3	3
61	102	1	1	2		1	0	1	3	2	4	4	2	4	4	3	3	3	4	4	4	4	4	4	3	2	4	4	3	4	3	#NULL!	4	3	3	4	4	4	2	4	3	3	4	3	3	4	3.66667	3.71429	3.5
62	103	2	2	3		1	0	1	3	2	#NULL!	4	2	1	4	2	4	3	4	4	4	4	4	4	4	2	4	4	4	5	4	#NULL!	5	5	4	5	1	3	4	4	3	5	5	3	1	3	3.83333	4	4.75
64	104	3	1	2		1	0	1	3	2	3	3	2	#NULL!	4	3	3	3	3	3	4	4	3	2	3	4	2	2	2	4	3	#NULL!	5	4	2	2	2	2	2	4	3	2	2	3	3	3	3.33333	2.57143	4
65	100	1	1	1		1	0	1	3	2	4	4	2	4	4	3	3	4	3	4	4	3	3	4	3	3	3	3	4	3	3	#NULL!	4	3	4	2	4	2	3	4	3	3	4	3	3	3	3.66667	3.28571	3.25
67	102	1	1	2		1	0	1	3	2	2	2	2	2	3	2	4	4	3	4	3	4	3	3	3	4	2	3	3	4	3	#NULL!	4	3	2	3	2	3	3	4	3	3	1	3	3	3	3.5	3	3.5
68	103	2	2	3		1	0	1	4	#NULL!	2	2	2	1	4	5	1	3	3	3	4	4	4	3	2	2	4	2	3	5	4	#NULL!	5	2	1	3	2	1	4	4	4	4	5	3	4	3	3	3.14286	4
70	104	3	1	2		1	0	1	2	1	4	3	2	5	4	2	4	4	4	4	4	4	4	4	4	2	4	4	4	3	4	#NULL!	3	4	4	3	2	2	3	4	4	4	3	4	3	4	4	4	3.5
71	100	1	1	1		1	0	1	3	2	3	3	1	4	3	3	3	3	3	3	3	3	3	3	3	3	3	3	3	3	3	#NULL!	3	3	3	3	3	3	3	3	3	3	3	3	3	3	3	3	3
73	102	1	1	2		1	0	1	2	1	4	3	1	5	4	2	4	4	4	5	3	3	3	4	3	2	4	3	3	4	3	#NULL!	4	3	3	3	2	3	3	4	3	4	3	3	4	4	4	3.28571	3.5
74	103	2	2	3		1	0	1	3	2	2	4	#NULL!	2	3	2	4	2	3	3	2	3	3	1	2	2	4	3	4	4	4	#NULL!	5	4	4	4	4	4	5	4	4	2	4	3	2	3	2.83333	2.85714	4.25
76	104	3	1	2		1	0	1	2	1	4	4	1	5	4	2	4	2	3	4	3	4	3	1	3	3	3	3	3	3	2	#NULL!	4	4	2	2	2	3	2	4	2	2	2	2	4	4	3.33333	2.85714	3.25
77	100	1	1	1		1	0	1	3	2	3	3	2	3	2	4	2	3	3	3	2	3	3	4	3	4	2	3	3	3	3	#NULL!	3	3	4	4	4	4	3	3	4	4	2	3	3	3	2.5	3	3
79	102	1	1	2		1	0	1	2	1	2	2	1	3	5	3	3	4	3	4	4	4	3	4	3	3	3	4	3	4	3	#NULL!	4	3	3	3	2	3	3	3	3	3	3	3	3	3	3.83333	3.42857	3.5
80	103	2	2	3		1	0	1	3	2	2	1	#NULL!	1	4	2	4	2	4	4	4	4	2	4	4	4	2	4	2	4	4	#NULL!	4	4	3	2	3	2	3	3	3	4	3	2	2	3	3.66667	3.14286	4
82	104	3	1	2		1	0	1	3	2	#NULL!	#NULL!	2	#NULL!	3	3	3	3	4	3	2	3	3	2	4	3	3	3	3	3	2	#NULL!	3	3	4	4	4	4	2	3	3	3	2	3	1	2	3	3	2.75
83	100	1	1	1		1	0	1	3	2	4	4	2	5	4	3	3	4	3	3	3	4	3	4	4	2	4	3	3	4	2	#NULL!	4	3	2	2	2	2	4	4	2	4	4	3	2	4	3.33333	3.57143	3.25
85	102	1	1	2		1	0	1	2	1	3	3	1	3	4	2	4	4	5	5	4	4	4	4	3	2	4	3	4	5	4	#NULL!	4	4	4	4	3	4	3	5	3	4	4	4	4	4	4.33333	3.71429	4.25
86	103	2	2	3		1	0	1	4	#NULL!	2	4	#NULL!	2	4	2	4	4	4	4	3	4	3	4	3	2	4	4	4	4	4	#NULL!	4	5	3	2	4	2	3	3	3	3	4	3	2	2	3.83333	3.71429	4.25
88	104	3	1	2		1	0	1	#NULL!	#NULL!	#NULL!	#NULL!	2	#NULL!	2	2	4	3	4	4	3	4	4	3	3	3	3	4	3	4	3	#NULL!	4	3	3	3	2	3	3	3	3	3	2	3	3	4	3.33333	3.42857	3.5
89	100	1	1	1		1	0	1	3	2	4	4	2	4	3	3	3	3	4	4	3	3	3	4	2	4	2	2	3	4	4	#NULL!	4	3	2	2	2	3	3	4	2	3	4	3	2	4	3.33333	2.71429	3.75
91	102	1	1	2		1	0	1	2	1	4	4	2	5	4	2	4	3	4	3	3	3	3	5	2	3	3	5	3	4	3	#NULL!	5	4	3	1	2	3	3	5	1	4	2	2	3	4	3.5	3.42857	4
92	103	2	2	3		1	0	1	3	2	2	2	2	1	4	2	4	4	4	4	4	4	4	2	4	2	4	4	4	4	4	#NULL!	4	4	2	3	2	3	4	3	3	4	4	3	2	3	4	3.71429	4
94	104	3	1	2		1	0	1	3	2	4	4	2	4	4	3	3	2	4	3	3	4	3	4	4	3	3	3	3	4	3	#NULL!	4	2	3	2	3	3	2	3	4	3	3	2	3	3	3.16667	3.42857	3.25
95	100	1	1	1		1	0	1	3	2	2	3	2	3	4	3	3	3	4	3	4	4	2	4	3	4	2	4	3	4	3	#NULL!	4	4	2	3	4	2	3	4	3	3	4	3	4	3	3.5	3.14286	3.75
97	102	1	1	2		1	0	1	2	1	4	4	2	3	2	2	4	3	3	4	3	3	3	3	3	3	3	3	2	5	2	#NULL!	5	2	2	1	3	2	2	4	1	4	2	3	3	3	3.16667	2.85714	3.5
98	103	2	2	3		1	0	1	3	2	2	2	2	2	4	3	3	2	3	4	3	3	4	4	2	3	3	1	3	4	3	#NULL!	4	2	3	4	2	3	2	4	4	4	4	1	3	3	3.16667	2.85714	3.25
100	104	3	1	2		1	0	1	3	2	4	4	2	4	3	2	4	3	4	4	3	4	3	4	3	3	3	3	3	5	4	#NULL!	5	5	3	1	2	2	3	5	3	3	3	4	4	4	3.5	3.28571	4.75
101	100	1	1	1		1	0	1	3	2	4	4	1	4	4	2	4	3	4	4	4	4	3	2	2	4	2	3	3	3	3	#NULL!	3	3	4	4	3	2	3	4	2	3	4	3	3	4	3.83333	2.71429	3
103	102	1	1	2		1	0	1	1	1	2	2	2	3	4	3	3	3	3	3	3	3	3	2	3	2	4	4	4	4	3	#NULL!	4	2	3	3	3	3	3	4	3	3	3	3	3	3	3.16667	3.28571	3.25
104	103	2	2	3		1	0	1	3	2	2	4	#NULL!	2	4	2	4	3	4	4	4	4	4	3	4	2	4	3	4	5	3	#NULL!	5	4	2	3	2	2	3	4	4	4	4	3	1	2	3.83333	3.71429	4.25
106	104	3	1	2		1	0	1	2	1	2	2	1	3	4	3	3	3	4	4	4	4	4	3	4	3	3	3	3	4	3	#NULL!	4	4	2	3	2	3	3	3	3	3	3	3	4	3	3.66667	3.42857	3.75
107	100	1	1	1		1	0	1	3	2	2	4	1	4	3	3	3	4	4	4	4	3	3	3	3	3	3	2	3	4	2	#NULL!	4	3	4	4	4	2	2	4	3	4	4	4	2	4	3.66667	2.85714	3.25
109	102	1	1	2		1	0	1	2	1	2	2	1	3	4	1	5	4	4	5	4	5	4	5	4	3	3	3	4	4	4	#NULL!	3	3	1	3	2	3	2	4	3	4	4	5	4	4	4.33333	4	3.5
110	103	2	2	3		1	0	1	4	#NULL!	2	2	1	2	4	3	3	3	4	4	4	4	4	2	3	1	5	3	4	4	4	#NULL!	5	4	4	2	2	3	3	4	3	4	4	3	2	3	3.66667	3.57143	4.25
112	104	3	1	2		1	0	1	3	2	4	4	2	4	4	2	4	4	3	4	4	4	1	3	2	2	4	4	4	4	3	#NULL!	4	4	5	2	4	3	1	4	2	2	3	3	1	4	3.83333	3.14286	3.75
113	100	1	1	1		1	0	1	3	2	3	4	2	4	3	3	3	3	3	4	2	3	3	3	2	4	2	3	3	3	3	#NULL!	3	2	4	2	3	2	3	3	3	3	3	3	3	3	3	2.71429	2.75
115	102	1	1	2		1	0	1	4	#NULL!	4	4	2	4	3	3	3	3	4	4	3	4	3	4	3	3	3	3	3	4	3	#NULL!	4	3	3	2	3	3	3	4	2	3	3	3	3	2	3.33333	3.28571	3.5
116	103	2	2	3		1	0	1	4	#NULL!	2	3	#NULL!	1	3	4	2	3	4	4	2	3	3	3	3	4	2	3	4	4	4	#NULL!	3	4	4	3	3	4	2	5	5	2	3	4	3	3	3	3	3.75
118	104	3	1	2		1	0	1	3	2	3	2	1	1	3	2	4	3	3	3	3	4	2	3	2	5	1	3	3	3	3	#NULL!	3	4	4	3	4	3	3	4	2	4	3	3	2	3	3.16667	2.57143	3.25
119	100	1	1	1		1	0	1	3	2	4	4	1	5	4	3	3	3	4	4	3	4	3	3	3	3	3	3	2	4	3	#NULL!	4	3	3	3	3	1	3	3	4	3	5	3	3	4	3.5	3	3.5
121	102	1	1	2		1	0	1	2	1	4	4	1	5	4	2	4	4	3	4	4	4	4	4	3	2	4	3	4	4	2	#NULL!	4	4	2	4	2	4	3	4	2	3	2	3	4	3	3.83333	3.71429	3.5
122	103	2	2	3		1	0	1	4	#NULL!	2	2	#NULL!	2	4	3	3	3	4	4	4	4	5	4	3	3	3	3	4	4	4	#NULL!	4	4	3	3	4	2	3	4	4	3	4	4	2	3	3.66667	3.71429	4
124	104	3	1	2		1	0	1	2	1	1	2	2	4	3	2	4	4	3	4	2	3	3	3	3	3	3	3	3	4	4	#NULL!	4	4	5	3	3	3	3	4	3	3	2	2	2	2	3.33333	3	4
125	100	1	1	1		1	0	1	3	2	4	4	2	4	4	3	3	3	4	4	3	3	2	4	3	3	3	2	2	4	2	#NULL!	4	2	4	3	4	2	2	4	2	3	3	3	3	3	3.5	2.71429	3
127	102	1	1	2		1	0	1	4	#NULL!	3	3	2	4	4	2	4	4	4	5	4	5	4	4	4	2	4	5	4	4	4	#NULL!	5	5	4	2	2	3	3	4	3	4	4	3	4	4	4.16667	4.28571	4.5
128	103	2	2	3		1	0	1	3	2	#NULL!	2	#NULL!	2	3	2	4	4	4	4	3	4	4	5	4	2	4	4	5	4	5	#NULL!	3	5	2	2	1	3	3	3	3	4	5	1	1	2	3.66667	4.28571	4.25
130	104	3	1	2		1	0	1	2	1	4	4	1	4	4	2	4	3	4	4	4	4	3	4	3	3	3	2	3	2	4	#NULL!	3	3	2	1	2	3	#NULL!	4	3	4	4	3	4	4	3.83333	3.14286	3
131	100	1	1	1		1	0	1	3	2	3	4	2	3	5	2	4	2	4	4	4	4	3	4	4	2	4	3	3	5	3	#NULL!	5	4	1	1	2	1	2	3	3	3	4	3	4	4	3.83333	3.57143	4.25
133	102	1	1	2		1	0	1	1	1	2	2	1	3	5	2	4	4	4	5	3	4	3	4	4	2	4	5	4	4	4	#NULL!	5	4	3	3	3	3	3	4	3	3	3	4	3	4	4.16667	4	4.25
134	103	2	2	3		1	0	1	4	#NULL!	3	4	#NULL!	1	3	2	4	3	4	4	3	3	3	3	2	2	4	1	3	2	4	#NULL!	4	1	2	2	1	1	3	4	3	3	5	3	3	2	3.5	2.71429	2.75
135	104	3	1	2		1	0	1	1	1	1	1	1	3	4	3	3	4	4	4	4	4	4	4	4	3	3	3	4	4	4	#NULL!	4	4	2	1	2	2	3	4	3	2	3	3	4	4	3.83333	3.71429	4
136	100	1	1	1		1	0	1	3	2	3	3	2	3	4	2	4	3	5	4	3	4	3	4	3	2	4	3	3	4	3	#NULL!	4	4	3	3	3	3	3	4	2	4	4	3	3	3	3.83333	3.42857	3.75
138	102	1	1	2		1	0	1	2	1	3	3	2	3	3	3	3	3	4	3	3	3	3	2	4	4	2	2	2	5	2	#NULL!	5	2	3	2	3	2	2	3	2	3	1	2	3	4	3.16667	2.57143	3.5
139	103	2	2	3		1	0	1	3	2	3	#NULL!	#NULL!	2	4	2	4	4	4	4	4	4	3	4	2	2	4	3	4	4	3	#NULL!	4	3	3	2	3	2	4	4	3	4	4	2	2	2	4	3.42857	3.5
140	104	3	1	2		1	0	1	3	2	2	4	2	4	3	3	3	3	3	3	3	3	3	4	2	2	4	4	4	3	3	#NULL!	3	3	3	3	4	3	2	4	2	3	2	3	3	3	3	3.42857	3
141	100	1	1	1		1	0	1	3	2	4	4	2	5	3	3	3	4	4	4	3	3	4	4	4	3	3	2	4	4	3	#NULL!	4	3	2	2	3	2	2	3	3	3	4	3	3	4	3.5	3.42857	3.5
143	102	1	1	2		1	0	1	2	1	4	4	1	3	4	2	4	4	4	4	4	3	4	4	2	2	4	4	4	4	3	#NULL!	4	3	2	3	2	3	3	3	2	4	4	4	4	3	4	3.57143	3.5
144	103	2	2	3		1	0	1	4	#NULL!	3	4	#NULL!	1	4	3	3	3	5	5	3	4	4	5	4	2	4	4	4	5	4	#NULL!	5	5	2	1	1	3	4	3	2	4	5	2	2	3	3.83333	4.14286	4.75
145	104	3	1	2		1	0	1	#NULL!	#NULL!	#NULL!	#NULL!	#NULL!	#NULL!	3	2	4	4	4	4	2	3	3	2	2	3	3	2	3	4	1	#NULL!	5	3	3	2	3	2	1	3	2	2	2	1	4	5	3.5	2.57143	3.25
146	100	1	1	1		1	0	1	3	2	4	4	2	4	2	4	2	3	3	3	3	3	2	3	3	4	2	3	2	4	2	#NULL!	4	3	2	4	4	4	3	4	2	2	4	3	2	3	2.66667	2.57143	3.25
148	102	1	1	2		1	0	1	3	2	3	2	2	4	2	3	3	3	3	3	2	3	4	4	4	3	3	3	4	5	3	#NULL!	5	2	5	2	5	4	3	4	1	3	1	1	3	1	2.66667	3.57143	3.75
149	103	2	2	3		1	0	1	3	2	3	4	#NULL!	1	2	4	2	4	2	4	3	4	4	3	2	3	3	3	4	3	3	#NULL!	4	4	2	3	2	3	2	4	5	3	5	3	4	3	2.83333	3.28571	3.5
150	104	3	1	2		1	0	1	3	2	2	2	2	3	4	2	4	4	3	4	3	4	2	4	3	3	3	4	4	4	4	#NULL!	4	3	3	3	4	3	2	2	3	3	4	4	4	4	3.66667	3.42857	3.75
151	100	1	1	1		1	0	1	3	2	4	4	2	4	3	3	3	2	4	4	4	4	3	4	3	2	4	4	4	4	3	#NULL!	3	3	2	3	2	2	4	4	3	3	4	4	3	4	3.33333	3.71429	3.25
153	102	1	1	2		1	0	1	3	2	4	4	2	5	3	3	3	3	3	3	3	4	3	3	4	3	3	3	3	5	3	#NULL!	5	3	3	2	2	2	3	4	3	3	3	2	2	3	3	3.28571	4
154	103	2	2	3		1	0	1	3	2	3	4	#NULL!	2	4	2	4	4	4	4	3	4	4	4	3	2	4	3	3	4	4	#NULL!	4	3	2	2	3	3	4	3	2	2	5	2	3	2	3.83333	3.57143	3.75
155	104	3	1	2		1	0	1	2	1	2	2	1	3	4	3	3	3	4	4	3	3	4	4	3	3	3	4	3	4	3	#NULL!	4	4	4	4	3	4	3	4	3	3	3	3	3	3	3.5	3.42857	3.75
156	100	1	1	1		1	0	1	1	1	1	2	2	3	4	3	3	4	4	4	4	4	4	2	3	2	4	3	3	5	3	#NULL!	4	4	3	2	3	3	3	4	3	3	3	3	3	3	3.83333	3.28571	4
158	102	1	1	2		1	0	1	3	2	2	2	2	2	3	3	3	3	4	4	3	2	3	4	3	3	3	3	3	4	3	#NULL!	3	3	3	3	2	3	3	4	3	3	3	3	3	3	3.33333	3	3.25
159	103	2	2	3		1	0	1	4	#NULL!	3	2	#NULL!	1	4	3	3	3	3	4	4	4	3	2	3	2	4	3	3	5	4	#NULL!	4	3	2	3	2	3	4	5	3	3	4	3	2	3	3.5	3.14286	4
160	104	3	1	2		1	0	1	2	1	4	4	2	4	4	2	4	4	4	3	4	4	3	3	3	2	4	3	3	4	4	#NULL!	4	4	2	2	2	2	3	4	3	3	4	4	4	4	3.83333	3.28571	4
161	100	1	1	1		1	0	1	2	1	4	4	1	4	4	2	4	4	4	4	4	4	4	4	4	2	4	4	3	4	3	#NULL!	4	4	3	2	3	4	3	4	3	3	3	3	4	4	4	3.85714	3.75
163	102	1	1	2		1	0	1	4	#NULL!	2	2	1	3	5	3	3	3	4	3	3	3	5	3	3	3	3	3	4	5	3	#NULL!	4	3	3	3	4	3	3	4	2	3	1	3	3	2	3.5	3.42857	3.75
164	103	2	2	3		1	0	1	4	#NULL!	3	2	#NULL!	1	2	4	2	3	3	3	3	3	3	3	2	3	3	2	2	4	4	#NULL!	4	2	2	3	2	3	4	4	3	4	4	3	3	3	2.66667	2.57143	3.5
165	104	3	1	2		1	0	1	1	1	1	1	1	2	3	3	3	3	3	3	4	4	3	3	3	2	4	3	3	4	3	#NULL!	4	4	2	2	3	3	3	3	3	3	3	3	4	3	3.16667	3.28571	3.75
166	100	1	1	1		1	0	1	2	1	4	4	1	4	4	3	3	3	3	4	4	4	3	4	3	2	4	4	4	4	3	#NULL!	4	3	4	3	3	4	3	4	3	3	3	3	4	3	3.5	3.71429	3.5
168	102	1	1	2		1	0	1	2	1	2	2	1	3	3	2	4	2	4	4	3	2	2	2	2	2	4	3	3	4	2	#NULL!	5	3	2	2	3	2	3	4	2	2	2	3	4	4	3.33333	2.57143	3.5
169	104	3	1	2		1	0	1	2	1	4	4	1	5	5	3	3	1	5	4	5	4	5	2	2	1	5	4	4	4	4	#NULL!	5	4	2	2	2	2	2	4	3	2	4	3	5	4	3.83333	3.71429	4.25
170	100	1	1	1		1	0	1	2	1	1	3	1	3	4	2	4	4	4	4	3	4	3	3	3	2	4	3	3	4	3	#NULL!	4	3	4	3	4	2	3	4	3	3	3	4	3	4	3.83333	3.28571	3.5
172	102	1	1	2		1	0	1	2	1	3	3	1	3	3	2	4	3	4	4	4	4	4	3	3	2	4	4	4	4	3	#NULL!	4	3	2	4	4	3	3	3	3	3	2	3	2	4	3.66667	3.71429	3.5
173	104	3	1	2		1	0	1	#NULL!	#NULL!	#NULL!	#NULL!	#NULL!	#NULL!	4	2	4	3	4	3	4	4	4	2	3	3	3	3	4	4	4	#NULL!	4	2	3	2	2	2	3	3	3	2	2	3	4	3	3.66667	3.28571	3.5
174	100	1	1	1		1	0	1	2	1	3	3	2	4	4	2	4	3	4	4	3	3	3	3	3	2	4	3	3	4	2	#NULL!	4	4	4	5	5	4	2	4	1	3	2	3	2	3	3.66667	3.14286	3.5
176	102	1	1	2		1	0	1	3	2	4	4	2	5	2	2	4	4	4	4	3	3	4	4	5	2	4	3	4	4	3	#NULL!	4	4	3	4	5	3	4	4	4	4	4	#NULL!	4	3	3.5	3.85714	3.75
177	104	3	1	2		1	0	1	3	2	2	2	#NULL!	#NULL!	4	4	2	3	4	2	4	4	4	2	3	2	4	3	3	3	3	#NULL!	3	3	3	2	2	2	2	3	3	3	2	3	3	3	3.16667	3.28571	3
178	100	1	1	1		1	0	1	2	1	4	4	1	4	4	2	4	4	4	4	4	3	3	4	3	2	4	3	3	4	3	#NULL!	4	3	2	3	2	3	3	3	3	3	4	3	4	4	4	3.28571	3.5
180	102	1	1	2		1	0	1	4	#NULL!	2	2	1	4	4	2	4	3	3	4	4	3	4	4	4	2	4	3	4	3	3	#NULL!	3	4	4	3	3	3	4	4	3	3	4	3	3	4	3.66667	3.71429	3.25
181	104	3	1	2		1	0	1	1	1	3	3	1	4	3	4	2	4	4	4	3	3	4	3	4	3	3	4	4	4	4	#NULL!	5	3	3	3	4	3	3	2	4	4	3	3	4	4	3.33333	3.57143	4
182	100	1	1	1		1	0	1	2	1	2	4	2	3	4	2	4	3	4	5	4	4	3	3	3	2	4	4	3	3	3	#NULL!	3	4	4	3	3	3	2	3	3	3	1	3	3	4	4	3.42857	3.25
184	102	1	1	2		1	0	1	2	1	2	2	1	5	4	2	4	3	3	4	3	3	4	5	4	1	5	3	4	5	4	#NULL!	5	3	4	4	3	2	4	#NULL!	3	3	4	4	4	4	3.5	4	4.25
185	104	3	1	2		1	0	1	2	1	1	2	1	3	4	2	4	4	4	4	4	4	4	3	3	2	4	3	4	4	3	#NULL!	4	4	3	3	3	3	3	4	3	3	4	3	3	3	4	3.57143	3.75
186	100	1	1	1		1	0	1	2	1	4	4	2	4	4	3	3	4	4	3	3	4	3	3	3	3	3	3	3	3	3	#NULL!	4	4	3	4	4	4	3	3	3	3	3	3	3	3	3.5	3.14286	3.5
188	102	1	1	2		1	0	1	3	2	4	4	#NULL!	#NULL!	4	2	4	4	3	2	3	3	3	4	3	2	4	4	3	5	3	#NULL!	5	4	2	2	3	3	3	3	2	3	4	3	4	4	3.33333	3.42857	4.25
189	100	1	1	1		1	0	1	2	1	2	3	2	3	4	3	3	3	4	4	4	4	3	3	3	3	3	4	4	5	3	#NULL!	4	5	2	3	4	2	3	3	1	2	4	4	4	5	3.66667	3.42857	4.25
191	104	3	1	2		1	0	1	2	1	4	4	2	4	5	3	3	3	5	4	4	4	4	4	3	3	3	3	3	5	#NULL!	#NULL!	4	4	1	2	2	3	#NULL!	#NULL!	#NULL!	#NULL!	3	#NULL!	4	#NULL!	4	3.42857	4.33333
192	102	1	1	2		1	0	1	1	1	2	2	2	3	3	2	4	3	4	4	3	3	4	3	4	2	4	5	4	4	4	#NULL!	4	3	4	3	3	3	3	4	3	3	4	3	4	3	3.5	3.85714	3.75
193	104	3	1	2		1	0	1	4	#NULL!	2	2	2	5	3	3	3	3	4	4	3	4	4	4	3	3	3	3	3	4	3	#NULL!	4	3	2	2	2	2	4	4	3	3	4	2	4	4	3.33333	3.42857	3.5
194	100	1	1	1		1	0	1	2	1	3	3	1	3	4	4	2	4	4	4	4	4	3	4	4	2	4	4	4	4	3	#NULL!	4	4	3	3	3	2	3	3	3	3	4	3	3	4	3.66667	3.85714	3.75
196	102	1	1	2		1	0	1	2	1	3	3	2	3	3	3	3	3	3	3	3	4	3	4	3	3	3	3	3	4	3	#NULL!	4	3	3	3	3	3	2	4	3	3	2	3	3	3	3	3.28571	3.5
197	104	3	1	2		1	0	1	3	2	2	2	2	4	3	2	4	4	4	4	3	4	4	3	3	3	3	4	3	4	3	#NULL!	4	3	4	3	3	4	3	4	3	2	3	3	3	3	3.66667	3.42857	3.5
198	100	1	1	1		1	0	1	2	1	2	4	1	3	5	2	4	4	5	5	4	5	4	5	4	2	4	3	4	4	4	#NULL!	5	4	3	3	2	4	3	4	2	3	4	3	4	4	4.5	4.14286	4.25
200	102	1	1	2		1	0	1	4	#NULL!	1	3	1	3	4	2	4	4	4	4	3	4	4	4	4	2	4	4	4	4	3	#NULL!	4	5	4	2	3	3	4	4	4	4	4	4	4	4	3.83333	4	4
201	104	3	1	2		1	0	1	3	2	4	4	1	5	4	3	3	3	3	4	4	4	4	4	3	3	3	5	3	4	4	#NULL!	4	4	5	3	2	2	3	5	4	3	2	3	2	4	3.5	3.71429	4
202	100	1	1	1		1	0	1	3	2	2	4	2	4	4	1	5	4	3	4	3	4	4	4	1	3	3	3	4	4	3	#NULL!	3	5	3	3	3	#NULL!	3	4	2	4	3	3	3	4	3.83333	3.28571	3.75
204	102	1	1	2		1	0	1	3	2	#NULL!	4	2	3	4	3	3	4	4	3	3	4	4	4	2	3	3	3	3	3	4	#NULL!	4	3	3	3	3	2	3	4	2	4	3	3	#NULL!	3	3.5	3.28571	3.5
205	104	3	1	2		1	0	1	2	1	3	3	1	4	3	2	4	4	4	4	4	4	4	5	2	4	2	4	3	4	3	#NULL!	5	3	2	3	2	3	3	3	3	3	1	3	4	3	3.83333	3.42857	3.75
206	100	1	1	1		1	0	1	3	2	1	2	1	3	5	3	3	3	5	5	4	3	2	4	5	2	4	4	4	5	2	#NULL!	5	3	3	4	3	4	2	5	3	3	5	3	2	3	4.16667	3.71429	3.75
208	102	1	1	2		1	0	1	3	2	4	4	2	5	3	#NULL!	#NULL!	2	2	3	3	2	2	4	3	3	3	3	3	5	1	#NULL!	5	1	3	2	1	2	3	4	2	3	2	3	#NULL!	2	2.6	2.85714	3
209	104	3	1	2		1	0	1	3	2	4	4	2	1	3	2	4	3	4	3	3	4	3	3	3	3	3	4	3	4	3	#NULL!	4	3	3	3	3	3	3	4	3	4	1	4	4	3	3.33333	3.28571	3.5
210	100	1	1	1		1	0	1	3	2	1	2	2	2	4	2	4	4	4	4	3	4	4	3	4	2	4	4	3	5	4	#NULL!	5	4	3	3	2	3	3	3	3	4	3	4	3	4	3.83333	3.71429	4.5
212	102	1	1	2		1	0	1	2	1	4	4	2	4	4	2	4	4	4	4	4	4	4	4	4	2	4	4	4	4	4	#NULL!	3	4	3	3	4	3	3	4	4	4	3	4	4	4	4	4	3.75
213	104	3	1	2		1	0	1	2	1	1	2	1	3	3	3	3	3	4	3	4	2	3	3	3	3	3	2	3	4	4	#NULL!	4	4	3	3	3	3	3	4	2	3	1	3	4	3	3.33333	2.71429	4
214	100	1	1	1		1	0	1	3	2	4	4	1	4	3	4	2	4	4	4	3	2	3	3	4	2	4	3	3	4	3	#NULL!	4	3	3	3	4	3	3	3	3	3	3	4	3	4	3.33333	3.14286	3.5
216	102	1	1	2		1	0	1	1	1	1	1	2	3	4	2	4	2	4	4	2	4	3	2	4	3	3	3	3	3	2	#NULL!	4	3	2	2	3	2	2	3	2	3	3	3	4	4	3.33333	3.14286	3
217	104	3	1	2		1	0	1	3	2	4	4	2	5	1	3	3	2	3	4	3	4	3	2	3	3	3	3	3	4	3	#NULL!	4	3	2	2	2	2	3	4	2	3	3	3	2	4	2.66667	3	3.5
218	100	1	1	1		1	0	1	3	2	1	4	2	3	5	1	5	3	5	4	4	3	4	4	4	2	4	4	4	4	4	#NULL!	5	4	4	3	3	3	3	4	3	3	4	4	3	4	4.33333	3.85714	4.25
220	102	1	1	2		1	0	1	3	2	4	4	2	5	3	3	3	3	3	4	2	#NULL!	3	4	3	3	3	4	3	4	3	#NULL!	4	3	4	3	3	1	3	4	3	3	3	3	3	4	3	3.33333	3.5
221	104	3	1	2		1	0	1	2	1	2	2	1	3	5	2	4	2	3	3	4	4	3	4	3	3	3	3	4	4	4	#NULL!	4	4	3	3	4	4	3	4	3	3	2	3	3	3	3.5	3.42857	4
222	100	1	1	1		1	0	1	3	2	4	4	2	5	4	2	4	4	4	4	4	4	4	4	4	2	4	4	4	4	3	#NULL!	4	4	3	3	2	3	3	3	3	4	4	4	3	4	4	4	3.75
224	102	1	1	2		1	0	1	4	#NULL!	2	2	1	4	4	2	4	3	4	2	4	4	#NULL!	3	3	3	3	2	3	3	#NULL!	#NULL!	3	3	3	3	3	2	2	2	2	2	3	4	3	4	3.5	3	3
225	104	3	1	2		1	0	1	2	1	2	2	1	3	5	2	4	4	4	5	4	4	4	4	3	1	5	4	5	3	3	#NULL!	3	3	3	3	3	3	2	3	3	3	3	3	3	3	4.33333	4.14286	3
226	100	1	1	1		1	0	1	3	2	3	4	1	4	4	2	4	3	5	4	3	4	3	4	2	4	2	3	3	4	3	#NULL!	4	4	4	4	3	3	3	4	3	3	4	4	4	4	3.83333	3	3.75
228	102	1	1	2		1	0	1	2	1	3	3	2	4	4	2	4	3	3	4	4	4	4	3	3	2	4	4	3	3	3	#NULL!	4	3	3	2	4	2	3	5	3	4	3	3	4	4	3.66667	3.57143	3.25
229	104	3	1	2		1	0	1	3	2	#NULL!	#NULL!	#NULL!	#NULL!	3	3	3	2	4	4	3	3	3	4	3	4	2	3	3	3	1	#NULL!	3	4	3	3	4	3	3	4	3	3	4	3	4	3	3.16667	3	2.75
230	100	1	1	1		1	0	1	3	2	1	1	2	2	4	2	4	4	5	4	3	4	4	3	4	2	4	3	4	5	3	#NULL!	5	3	2	3	3	3	3	3	3	3	3	3	3	4	4	3.71429	4
232	102	1	1	2		1	0	1	2	1	2	2	1	3	4	3	3	3	4	4	3	3	3	3	3	2	4	3	2	4	3	#NULL!	5	3	3	3	3	2	3	5	3	3	4	3	3	3	3.5	3	3.75
233	104	3	1	2		1	0	1	1	1	1	#NULL!	#NULL!	#NULL!	3	3	3	2	3	3	3	3	2	2	4	3	3	3	2	4	2	#NULL!	4	4	3	4	3	3	2	4	3	2	3	3	3	3	2.83333	2.71429	3.5
234	100	1	1	1		1	0	1	3	2	2	2	1	4	4	3	3	2	4	4	2	4	2	4	3	3	3	2	2	5	3	#NULL!	5	3	4	2	3	3	2	4	2	4	4	4	4	4	3.16667	2.85714	4
236	102	1	1	2		1	0	1	2	1	4	4	1	4	3	2	4	4	4	5	4	4	4	3	1	2	4	5	3	4	2	#NULL!	5	3	4	4	4	4	1	4	2	4	1	4	5	5	4	3.42857	3.5
237	100	1	1	1		1	0	1	3	2	4	4	2	4	4	3	3	4	4	5	4	4	4	4	3	3	3	4	3	4	3	#NULL!	4	4	3	3	4	3	3	4	3	3	4	4	3	4	4	3.57143	3.75
238	104	3	1	2		1	0	1	2	1	2	2	1	3	4	4	2	2	3	4	3	3	3	3	3	4	2	4	3	4	2	#NULL!	4	4	4	4	3	2	2	4	4	3	2	3	3	3	3	3	3.5
240	102	1	1	2		1	0	1	2	1	2	2	1	4	4	3	3	3	3	4	2	3	3	3	3	3	3	2	3	4	2	#NULL!	5	3	2	2	3	2	3	5	2	3	4	3	4	3	3.16667	2.85714	3.5
241	100	1	1	1		1	0	1	3	2	4	4	#NULL!	5	4	2	4	3	4	4	4	4	4	4	4	2	4	3	4	4	2	#NULL!	4	4	4	2	3	4	3	4	3	4	4	3	3	3	3.83333	3.85714	3.5
243	102	1	1	2		1	0	1	4	#NULL!	4	4	1	5	5	3	3	3	4	4	4	4	3	4	3	2	4	3	3	4	3	#NULL!	4	4	3	3	3	3	3	3	3	3	3	4	3	4	3.83333	3.42857	3.75
244	100	1	1	1		1	0	1	3	2	2	3	2	4	4	1	5	5	4	4	4	5	5	4	4	1	5	4	4	4	4	#NULL!	4	4	4	2	4	4	4	2	4	4	4	3	4	4	4.33333	4.42857	4
246	102	1	1	2		1	0	1	1	1	2	2	1	2	4	2	4	4	4	3	3	4	3	4	4	2	4	4	3	4	2	#NULL!	4	3	3	4	3	4	2	4	3	3	4	3	4	3	3.66667	3.71429	3.25
247	100	1	1	1		1	0	1	3	2	4	4	2	5	3	2	4	3	4	4	3	3	2	4	3	3	3	3	4	2	3	#NULL!	3	3	3	3	3	3	2	4	2	3	4	3	3	4	3.5	3.14286	2.75
249	102	1	1	2		1	0	1	2	1	3	3	2	3	3	3	3	3	3	4	3	3	3	3	3	3	3	3	3	4	3	#NULL!	4	3	4	3	3	3	2	4	3	3	3	4	3	4	3.16667	3	3.5
250	100	1	1	1		1	0	1	3	2	4	4	2	4	4	2	4	3	4	4	4	4	3	4	4	3	3	3	3	4	3	#NULL!	3	3	2	3	3	3	3	3	3	3	4	3	3	3	3.83333	3.42857	3.25
252	102	1	1	2		1	0	1	2	1	2	2	1	5	4	2	4	4	4	4	4	4	3	4	3	1	5	4	4	4	3	#NULL!	5	5	2	3	2	2	4	2	3	4	3	3	3	4	4	3.85714	4.25
253	100	1	1	1		1	0	1	3	2	1	1	1	2	4	3	3	3	5	4	4	4	3	4	4	3	3	3	4	4	4	#NULL!	4	4	3	3	3	2	3	4	3	3	4	4	3	4	3.83333	3.57143	4
255	102	1	1	2		1	0	1	2	1	4	4	1	5	4	3	3	4	4	4	3	4	4	4	4	2	4	4	4	3	3	#NULL!	3	3	2	4	2	4	3	4	4	4	4	3	3	3	3.66667	4	3
256	100	1	1	1		1	0	1	3	2	4	4	2	4	4	3	3	3	3	4	3	3	3	3	4	3	3	3	3	4	3	#NULL!	4	3	3	3	3	3	3	3	3	3	3	3	3	4	3.33333	3.14286	3.5
258	102	1	1	2		1	0	1	4	#NULL!	2	4	1	5	5	1	5	3	5	4	3	4	4	4	4	3	3	5	4	4	2	#NULL!	4	3	5	3	2	4	1	1	1	4	4	3	2	3	4.16667	4	3.25
259	100	1	1	1		1	0	1	3	2	3	3	2	2	3	3	3	3	4	4	3	4	4	4	4	3	3	3	3	5	4	#NULL!	5	4	4	3	3	4	3	4	2	4	3	3	3	3	3.33333	3.57143	4.5
261	102	1	1	2		1	0	1	2	1	4	4	#NULL!	5	5	1	5	4	4	5	4	5	4	5	3	1	5	5	4	5	4	#NULL!	5	4	3	1	1	2	3	3	3	4	5	4	4	4	4.5	4.42857	4.5
262	100	1	1	1		1	0	1	3	2	2	2	2	4	4	3	3	4	3	3	4	3	#NULL!	4	2	3	3	3	3	4	3	#NULL!	3	3	3	2	3	#NULL!	3	4	3	2	2	3	#NULL!	3	3.5	3	3.25
264	102	1	1	2		1	0	1	3	2	3	3	2	2	4	3	3	4	4	4	3	4	4	4	3	3	3	4	3	4	3	#NULL!	4	4	2	2	3	2	3	3	3	3	3	3	3	3	3.66667	3.57143	3.75
265	100	1	1	1		1	0	1	3	2	2	3	1	3	5	2	4	3	4	5	5	5	2	5	3	3	3	4	4	5	3	#NULL!	4	5	4	2	5	2	1	5	2	1	4	4	2	4	4.33333	3.71429	4.25
267	102	1	1	2		1	0	1	2	1	3	3	1	4	4	1	5	4	4	4	3	4	3	4	4	1	5	5	4	4	2	#NULL!	4	4	4	1	2	3	3	5	3	3	2	4	4	4	4	4.14286	3.5
268	100	1	1	1		1	0	1	3	2	3	4	2	4	4	3	3	4	4	4	3	4	4	4	3	3	3	3	3	4	3	#NULL!	4	3	3	3	3	3	3	3	3	3	4	3	3	4	3.66667	3.42857	3.5
270	102	1	1	2		1	0	1	2	1	4	3	1	4	4	3	3	3	4	4	3	4	3	4	3	2	4	4	3	4	3	#NULL!	4	3	4	2	2	2	3	4	3	3	3	3	3	3	3.5	3.57143	3.5
271	100	1	1	1		1	0	1	3	2	2	3	2	2	4	2	4	4	4	4	4	3	3	3	4	2	4	4	4	4	3	#NULL!	4	4	3	2	2	2	3	4	3	3	5	4	4	4	4	3.57143	3.75
273	102	1	1	2		1	0	1	3	2	3	4	2	4	3	3	3	3	4	3	4	3	3	3	3	2	4	3	3	4	3	#NULL!	4	3	3	3	4	4	2	3	3	3	3	3	2	3	3.33333	3.14286	3.5
274	100	1	1	1		1	0	1	3	2	3	3	2	4	4	3	3	3	3	3	3	2	3	4	3	4	2	3	4	3	4	#NULL!	3	4	3	3	3	3	4	4	2	3	2	3	3	2	3.16667	3	3.5
276	102	1	1	2		1	0	1	2	1	1	1	1	3	5	4	2	4	5	5	4	4	4	4	4	2	4	5	4	4	3	#NULL!	4	4	3	3	3	2	3	4	3	3	3	3	4	3	4.16667	4.14286	3.75
277	100	1	1	1		1	0	1	3	2	4	4	2	5	4	3	3	3	3	3	3	3	3	4	4	4	2	3	3	4	4	#NULL!	4	4	2	2	2	2	4	4	3	3	4	4	3	4	3.16667	3.14286	4
279	102	1	1	2		1	0	1	2	1	4	4	1	5	#NULL!	2	4	4	4	4	3	4	4	5	3	2	4	3	#NULL!	3	3	#NULL!	3	#NULL!	4	3	3	3	#NULL!	4	1	4	#NULL!	#NULL!	3	4	3.8	3.83333	3
280	100	1	1	1		1	0	1	3	2	3	4	2	4	3	3	3	3	3	4	3	3	3	3	2	3	3	3	3	3	3	#NULL!	3	3	3	4	3	3	3	4	3	2	3	2	2	3	3.16667	2.85714	3
282	102	1	1	2		1	0	1	2	1	2	2	1	4	4	2	4	4	4	4	3	3	2	3	4	2	4	3	4	4	3	#NULL!	4	4	3	2	3	3	3	3	2	3	3	4	3	4	3.83333	3.28571	3.75
283	100	1	1	1		1	0	1	3	2	4	4	2	4	5	2	4	3	5	4	4	3	4	3	5	2	4	3	4	4	4	#NULL!	4	3	1	3	3	1	3	4	3	3	4	3	4	4	4.16667	3.71429	3.75
285	100	1	1	1		1	0	1	3	2	2	3	2	2	4	3	3	4	5	5	4	4	4	4	3	3	3	3	4	5	3	#NULL!	5	5	3	2	2	3	#NULL!	4	3	4	3	2	4	4	4.16667	3.57143	4.5
287	100	1	1	1		1	0	1	3	2	4	4	2	3	2	2	4	3	4	4	3	4	3	3	4	2	4	4	4	3	3	#NULL!	4	4	4	4	3	3	#NULL!	4	3	4	4	#NULL!	3	4	3.33333	3.71429	3.5
289	100	1	1	1		1	0	1	3	2	4	4	2	3	4	2	4	3	5	5	4	4	3	2	3	4	2	3	3	3	#NULL!	#NULL!	4	3	1	1	1	1	2	5	4	3	4	3	4	4	4.16667	2.85714	3.33333
291	105	1	1	4		1	0	1	3	2	2	4	1	4	4	3	3	4	4	4	3	4	3	1	3	2	4	3	3	3	4	#NULL!	4	3	4	3	3	3	4	5	4	4	4	4	3	4	3.66667	3	3.5
293	105	1	1	4		1	0	1	3	2	2	2	2	3	4	2	4	4	4	4	3	4	3	4	4	2	4	3	4	4	3	#NULL!	4	3	3	2	3	2	2	3	3	3	3	3	3	4	3.83333	3.71429	3.5
295	105	1	1	4		1	0	1	3	2	2	2	2	3	4	3	3	4	4	5	4	4	3	5	3	2	4	3	4	4	3	#NULL!	4	3	2	2	3	3	2	3	3	3	3	3	3	4	4	3.71429	3.5
297	105	1	1	4		1	0	1	3	2	#NULL!	4	2	5	4	2	4	3	4	4	3	3	3	4	3	2	4	4	3	4	3	#NULL!	4	4	3	2	3	1	3	4	3	3	3	2	3	2	3.66667	3.42857	3.75
299	105	1	1	4		1	0	1	#NULL!	#NULL!	3	4	2	#NULL!	4	4	2	4	4	4	2	4	4	4	4	2	4	4	4	5	4	#NULL!	4	4	2	2	2	3	4	3	3	4	3	4	3	4	3.33333	4	4.25
301	105	1	1	4		1	0	1	3	2	#NULL!	4	2	4	4	2	4	3	4	4	3	4	3	#NULL!	4	2	4	3	3	3	4	#NULL!	3	4	3	3	3	3	4	3	3	3	3	3	3	5	3.66667	3.5	3.5
303	105	1	1	4		1	0	1	3	2	2	4	2	3	4	3	3	3	4	4	2	4	3	3	4	2	4	3	3	4	3	#NULL!	4	4	3	3	2	3	3	3	2	4	3	4	4	4	3.33333	3.42857	3.75
305	105	1	1	4		1	0	1	3	2	1	4	2	4	4	4	2	3	4	4	3	4	3	2	5	2	4	5	3	3	3	#NULL!	4	2	2	2	2	4	3	3	1	4	1	4	4	2	3.33333	3.71429	3
307	105	1	1	4		1	0	1	3	2	4	4	2	4	3	3	3	3	4	4	3	3	3	4	2	2	4	2	3	3	3	#NULL!	4	2	3	3	2	3	3	4	3	3	3	3	3	3	3.33333	3	3
309	105	1	1	4		1	0	1	3	2	3	4	2	5	4	2	4	4	4	4	3	3	3	4	4	2	4	3	4	4	3	#NULL!	4	4	3	3	3	3	3	3	3	3	3	3	4	3	3.83333	3.57143	3.75
311	100	1	1	1		1	0	1	3	2	3	4	2	3	3	3	3	3	4	4	3	4	3	4	2	3	3	4	4	4	3	#NULL!	4	4	3	3	3	2	3	4	2	3	1	4	2	3	3.33333	3.42857	3.75
313	100	1	1	1		1	0	1	3	2	3	3	1	3	2	2	4	3	3	4	3	3	2	2	3	4	2	3	3	3	2	#NULL!	4	3	4	3	2	2	2	4	3	3	3	3	3	3	3.16667	2.57143	3
315	100	1	1	1		1	0	1	3	2	3	3	2	4	4	2	4	4	4	4	4	4	3	4	4	3	3	4	3	4	3	#NULL!	4	4	2	3	4	4	3	3	3	3	4	2	4	4	4	3.57143	3.75
317	100	1	1	1		1	0	1	3	2	3	3	2	4	4	2	4	4	4	5	2	3	3	4	5	3	3	4	3	5	3	#NULL!	5	4	5	3	4	3	4	4	4	3	3	3	3	3	3.83333	3.57143	4.25
319	100	1	1	1		1	0	1	3	2	4	4	1	4	4	3	3	3	4	5	3	4	3	4	3	2	4	3	4	4	3	#NULL!	4	3	4	3	2	2	3	4	2	2	2	4	2	4	3.66667	3.57143	3.5
321	100	1	1	1		1	0	1	3	2	2	2	2	2	4	2	4	4	5	5	4	4	3	2	3	2	4	2	4	5	3	#NULL!	5	4	2	2	3	2	3	4	3	3	4	3	4	4	4.33333	3.14286	4.25
323	100	1	1	1		1	0	1	3	2	2	2	2	3	3	3	3	3	4	4	3	3	3	3	3	2	4	3	3	4	3	#NULL!	4	4	3	3	3	3	3	3	3	3	1	3	3	3	3.33333	3.14286	3.75
325	100	1	1	1		1	0	1	3	2	4	4	1	4	3	1	5	4	4	5	3	5	3	5	3	2	4	4	4	5	4	#NULL!	5	4	3	3	3	3	3	4	2	4	4	3	3	4	4	4	4.5
327	100	1	1	1		1	0	1	3	2	3	3	2	3	2	2	4	3	4	4	3	3	3	4	3	3	3	3	3	3	4	#NULL!	4	4	4	4	3	3	3	4	2	3	2	3	3	3	3.33333	3.14286	3.75
329	100	1	1	1		1	0	1	3	2	2	2	1	4	4	2	4	4	4	4	3	4	4	4	3	2	4	4	4	3	3	#NULL!	2	4	2	3	2	4	3	4	3	4	4	4	3	4	3.83333	3.85714	3
331	100	1	1	1		1	0	1	3	2	4	4	1	4	4	4	2	4	4	4	4	4	3	3	4	2	4	4	4	4	3	#NULL!	4	4	2	3	2	2	3	4	3	4	3	3	4	3	3.66667	3.71429	3.75
333	100	1	1	1		1	0	1	3	2	3	4	1	4	4	3	3	4	5	4	4	4	4	5	3	3	3	4	3	4	4	#NULL!	4	3	2	3	3	3	3	4	3	3	3	4	4	4	4	3.71429	3.75
335	100	1	1	1		1	0	1	3	2	4	4	2	5	4	2	4	3	5	4	3	4	4	3	3	1	5	4	4	4	3	#NULL!	4	5	3	2	2	2	3	4	3	3	3	4	4	4	3.83333	3.85714	4
337	100	1	1	1		1	0	1	3	2	4	4	2	5	3	2	4	3	4	4	3	3	2	3	4	2	4	4	4	3	3	#NULL!	3	4	4	3	4	3	2	4	3	3	2	3	3	4	3.5	3.42857	3.25
339	100	1	1	1		1	0	1	3	2	4	4	1	5	4	3	3	4	4	4	4	3	4	4	4	1	5	4	4	3	4	#NULL!	4	4	4	4	4	4	3	1	3	4	3	3	4	3	3.83333	4	3.75
341	100	1	1	1		1	0	1	3	2	#NULL!	4	2	4	3	2	4	4	4	5	3	4	3	4	3	2	4	3	4	4	3	#NULL!	4	4	2	3	3	2	3	4	2	3	2	3	3	3	3.83333	3.57143	3.75
343	100	1	1	1		1	0	1	3	2	4	4	1	4	3	2	4	3	4	4	3	4	3	4	3	3	3	3	3	4	1	#NULL!	4	4	3	4	3	4	3	4	2	3	3	3	3	4	3.5	3.28571	3.25
345	100	1	1	1		1	0	1	3	2	4	4	2	4	4	2	4	3	4	4	3	3	4	4	4	2	4	4	3	4	3	#NULL!	5	4	2	1	2	1	3	4	3	3	4	4	4	4	3.66667	3.71429	4
347	100	1	1	1		1	0	1	3	2	2	4	2	3	3	2	4	4	5	5	4	4	4	3	5	2	4	4	3	5	4	#NULL!	5	4	3	3	3	2	3	4	3	4	4	4	3	4	4.16667	3.85714	4.5
349	100	1	1	1		1	0	1	3	2	1	3	2	3	4	2	4	3	4	4	4	4	3	3	3	2	4	3	4	4	3	#NULL!	4	4	4	3	3	2	2	4	3	3	4	3	3	3	3.83333	3.42857	3.75
351	100	1	1	1		1	0	1	3	2	3	3	1	3	4	3	3	4	4	5	4	2	4	3	3	2	4	2	3	4	3	#NULL!	5	4	4	3	3	3	3	3	3	3	4	3	3	3	4	3	4
353	100	1	1	1		1	0	1	3	2	1	1	1	4	4	2	4	4	4	5	4	#NULL!	5	4	3	2	4	4	4	4	3	#NULL!	5	5	4	2	3	2	4	5	4	4	4	4	3	4	4.16667	4	4.25
355	100	1	1	1		1	0	1	3	2	4	4	2	4	4	3	3	3	3	4	3	4	4	4	3	3	3	4	3	4	3	#NULL!	4	4	3	3	3	4	3	3	3	2	4	3	3	3	3.33333	3.57143	3.75
357	100	1	1	1		1	0	1	3	2	4	4	2	4	3	2	4	3	4	4	3	4	4	3	3	3	3	4	2	4	3	#NULL!	#NULL!	3	#NULL!	1	3	2	3	4	3	3	5	3	3	3	3.5	3.28571	3.33333
359	100	1	1	1		1	0	1	3	2	4	4	2	5	4	2	4	4	4	4	2	4	3	4	3	2	4	4	3	4	3	#NULL!	4	4	2	2	4	3	3	5	1	3	3	4	3	4	3.66667	3.57143	3.75
361	100	1	1	1		1	0	1	3	2	1	1	2	2	4	2	4	3	4	4	3	4	4	3	4	3	3	3	2	3	3	#NULL!	4	3	4	2	4	3	2	4	4	4	4	4	3	4	3.66667	3.28571	3.25
363	100	1	1	1		1	0	1	3	2	2	2	1	2	4	2	4	4	4	4	3	4	3	3	4	2	4	3	4	4	4	#NULL!	4	4	2	1	4	3	2	4	2	4	4	4	2	4	3.83333	3.57143	4
365	100	1	1	1		1	0	1	3	2	2	#NULL!	2	2	3	2	4	3	5	4	3	4	4	4	2	2	4	4	3	4	3	#NULL!	5	5	3	3	2	3	3	4	2	2	4	3	3	4	3.66667	3.57143	4.25
367	100	1	1	1		1	0	1	3	2	4	4	2	3	3	2	4	3	4	4	3	4	3	3	3	3	3	3	3	4	3	#NULL!	4	3	3	3	2	2	3	3	4	3	3	4	3	4	3.5	3.14286	3.5
369	100	1	1	1		1	0	1	3	2	3	2	2	2	4	3	3	4	5	5	4	4	4	#NULL!	3	3	3	4	3	4	3	#NULL!	4	5	2	2	2	2	3	4	3	4	4	3	3	3	4.16667	3.5	4
371	100	1	1	1		1	0	1	3	2	3	3	2	3	3	3	3	3	4	4	3	3	3	3	3	3	3	3	3	4	3	#NULL!	4	4	3	4	3	4	3	3	#NULL!	3	3	3	3	3	3.33333	3	3.75
373	100	1	1	1		1	0	1	3	2	4	2	2	4	4	2	4	3	4	4	3	4	4	4	3	3	3	4	4	4	3	#NULL!	4	4	3	3	2	3	3	4	3	2	4	4	3	4	3.66667	3.71429	3.75
375	100	1	1	1		1	0	1	3	2	2	4	2	5	4	3	3	3	3	4	3	3	3	4	2	3	3	4	3	3	2	#NULL!	3	3	2	3	4	2	3	2	2	3	3	3	4	4	3.33333	3.14286	2.75
377	100	1	1	1		1	0	1	3	2	4	4	1	5	2	3	3	2	4	4	3	4	3	3	3	3	3	2	3	4	3	#NULL!	5	3	3	2	3	3	2	5	2	2	3	4	3	4	3	3	3.75
379	100	1	1	1		1	0	1	3	2	4	4	1	5	4	4	2	4	4	4	1	3	2	4	4	3	3	4	3	4	1	#NULL!	4	4	4	4	4	3	2	4	3	3	4	4	3	2	3.16667	3.28571	3.25
381	100	1	1	1		1	0	1	3	2	4	4	2	4	3	2	4	3	4	3	3	3	2	4	3	3	3	4	4	4	2	#NULL!	4	4	3	2	2	2	2	4	3	3	4	3	3	4	3.33333	3.28571	3.5
383	100	1	1	1		1	0	1	3	2	3	4	2	3	4	2	4	3	4	4	3	4	4	3	2	2	4	4	3	4	3	#NULL!	4	3	4	3	3	2	3	4	2	3	4	4	4	4	3.66667	3.42857	3.5
385	100	1	1	1		1	0	1	3	2	1	1	2	2	5	3	3	3	4	4	4	4	4	3	3	2	4	3	3	4	3	#NULL!	5	4	3	3	3	3	3	4	3	3	4	3	3	4	3.83333	3.42857	4
387	100	1	1	1		1	0	1	3	2	3	3	2	3	4	3	3	3	4	3	3	4	3	3	2	3	3	2	3	4	3	#NULL!	4	4	2	1	3	3	3	3	3	3	3	3	3	3	3.33333	2.85714	3.75
389	100	1	1	1		1	0	1	3	2	1	2	1	2	4	2	4	4	4	5	2	5	3	3	5	2	4	4	3	4	4	#NULL!	5	4	2	3	5	4	4	5	3	4	5	4	3	5	3.83333	3.85714	4.25
391	100	1	1	1		1	0	1	3	2	2	3	1	2	4	2	4	4	4	4	4	4	3	4	4	1	5	4	4	4	3	#NULL!	4	4	4	3	3	4	3	4	3	3	3	4	3	4	4	4	3.75
393	100	1	1	1		1	0	1	3	2	4	4	2	5	3	4	2	3	4	4	3	3	3	4	4	3	3	3	4	4	3	#NULL!	3	4	3	3	3	3	3	3	3	3	3	3	3	4	3.16667	3.42857	3.5
395	100	1	1	1		1	0	1	3	2	4	4	2	4	3	3	3	3	3	3	2	2	2	4	2	4	2	3	2	3	3	#NULL!	3	3	3	3	4	3	2	4	3	2	1	3	2	3	2.83333	2.42857	3
397	100	1	1	1		1	0	1	3	2	3	2	2	3	2	3	3	3	3	3	3	4	3	3	3	2	4	3	4	4	4	#NULL!	5	4	3	3	5	3	3	4	3	4	3	3	2	4	2.83333	3.42857	4.25
399	100	1	1	1		1	0	1	3	2	3	2	2	3	3	2	4	4	4	4	3	4	4	3	2	2	4	3	3	4	3	#NULL!	3	3	2	3	3	3	3	4	3	3	3	3	3	3	3.66667	3.28571	3.25
401	100	1	1	1		1	0	1	3	2	4	4	2	4	3	2	4	4	4	4	3	4	4	3	2	2	4	3	4	4	3	#NULL!	3	3	2	2	2	2	2	4	3	4	3	3	3	3	3.66667	3.42857	3.25
403	100	1	1	1		1	0	1	3	2	4	3	1	4	4	2	4	4	4	4	3	4	3	4	3	3	3	3	3	4	3	#NULL!	4	4	3	3	4	2	4	4	3	4	3	3	3	4	3.83333	3.28571	3.75
405	100	1	1	1		1	0	1	3	2	2	2	2	2	4	3	3	3	4	3	4	4	3	4	4	2	4	3	3	4	4	#NULL!	4	4	3	3	3	2	#NULL!	4	4	3	3	4	3	4	3.5	3.57143	4
407	100	1	1	1		1	0	1	3	2	4	4	1	5	3	3	3	3	3	3	2	3	3	3	3	2	4	3	2	3	3	#NULL!	3	3	3	3	3	3	4	4	3	4	3	#NULL!	3	4	2.83333	3	3
409	100	1	1	1		1	0	1	3	2	4	4	2	4	4	2	4	4	5	4	4	3	3	5	4	2	4	#NULL!	4	5	3	#NULL!	5	4	4	3	2	1	1	4	4	3	4	4	4	2	4.16667	3.83333	4.25
411	100	1	1	1		1	0	1	3	2	2	4	2	3	4	2	4	2	4	4	2	2	2	2	2	2	4	3	2	3	2	#NULL!	4	4	3	2	2	2	1	3	5	2	1	1	1	4	3.33333	2.42857	3.25
413	100	1	1	1		1	0	1	3	2	2	2	2	4	4	4	2	4	4	4	3	4	4	4	3	3	3	3	3	4	4	#NULL!	4	4	2	2	4	2	3	4	2	3	3	4	3	4	3.5	3.42857	4
415	100	1	1	1		1	0	1	3	2	4	4	2	4	4	2	4	4	5	4	3	4	3	3	2	3	3	4	4	#NULL!	3	#NULL!	4	4	3	3	2	2	3	4	3	2	3	4	4	4	4	3.28571	3.66667
417	100	1	1	1		1	0	1	3	2	2	2	2	2	4	3	3	4	5	5	4	5	4	4	3	2	4	3	3	4	4	#NULL!	5	4	5	2	3	2	3	5	#NULL!	4	4	4	2	4	4.16667	3.71429	4.25
419	100	1	1	1		1	0	1	3	2	4	4	1	5	3	2	4	3	3	3	2	4	2	4	3	3	3	3	3	3	3	#NULL!	4	3	3	3	3	3	3	3	3	3	2	3	2	4	3	3.14286	3.25
421	100	1	1	1		1	0	1	3	2	4	4	1	5	5	2	4	4	4	4	3	4	3	3	4	2	4	4	4	5	4	#NULL!	4	4	1	1	2	1	3	4	3	3	4	4	4	4	4	3.71429	4.25
423	100	1	1	1		1	0	1	3	2	1	2	1	2	4	4	2	4	4	4	4	4	4	3	4	2	4	4	3	4	4	#NULL!	4	3	3	3	4	3	4	4	3	4	4	4	4	4	3.66667	3.71429	3.75
425	100	1	1	1		1	0	1	3	2	4	4	1	4	4	3	3	3	5	4	2	4	3	3	3	3	3	3	3	4	3	#NULL!	4	3	4	3	3	4	3	3	3	3	4	3	2	4	3.5	3.14286	3.5
427	100	1	1	1		1	0	1	3	2	3	3	2	4	4	2	4	3	4	5	3	4	3	4	4	2	4	3	4	4	3	#NULL!	4	3	3	2	4	3	1	4	3	4	2	4	3	4	3.83333	3.71429	3.5
429	100	1	1	1		1	0	1	3	2	2	2	2	4	3	2	4	3	4	3	3	3	#NULL!	4	3	2	4	3	3	3	3	#NULL!	3	3	3	3	3	3	3	4	3	3	3	4	3	4	3.33333	3.33333	3
431	100	1	1	1		1	0	1	3	2	2	2	2	3	3	1	5	4	5	5	1	5	4	4	3	2	4	4	5	4	3	#NULL!	3	3	2	2	2	1	2	4	3	4	5	4	4	5	3.83333	4.14286	3.25
433	100	1	1	1		1	0	1	3	2	4	4	2	4	4	2	4	3	4	4	3	4	3	4	4	2	4	2	4	3	3	#NULL!	4	4	3	3	4	4	3	3	3	3	2	3	3	4	3.66667	3.57143	3.5
435	100	1	1	1		1	0	1	3	2	2	3	2	3	4	2	4	3	4	4	4	4	4	4	3	3	3	3	3	4	4	#NULL!	4	4	2	2	3	2	3	4	3	3	4	3	3	4	3.83333	3.42857	4
437	100	1	1	1		1	0	1	3	2	2	3	2	2	4	2	4	4	5	4	3	4	3	4	4	2	4	4	3	4	3	#NULL!	4	4	4	2	3	3	3	4	3	3	4	4	3	4	4	3.71429	3.75
439	100	1	1	1		1	0	1	#NULL!	#NULL!	1	1	2	2	4	2	4	4	5	4	4	4	3	4	4	2	4	4	4	5	4	#NULL!	2	4	#NULL!	3	3	#NULL!	#NULL!	#NULL!	4	4	4	#NULL!	4	5	4.16667	3.85714	3.75
441	100	1	1	1		1	0	1	3	2	2	2	2	2	4	2	4	3	4	4	4	4	3	4	3	2	4	2	3	4	3	#NULL!	4	3	3	3	2	4	3	4	3	3	2	3	3	3	3.83333	3.28571	3.5
443	100	1	1	1		1	0	1	3	2	4	4	2	3	4	1	5	3	5	5	4	4	4	3	3	2	4	4	4	4	3	#NULL!	4	3	2	1	2	1	3	4	2	2	3	3	3	4	4.33333	3.71429	3.5
445	100	1	1	1		1	0	1	3	2	3	4	2	3	4	2	4	4	5	4	3	4	4	4	4	3	3	4	4	4	4	#NULL!	4	4	2	3	2	2	3	4	3	3	4	4	4	4	4	3.85714	4
447	100	1	1	1		1	0	1	3	2	4	4	1	5	3	2	4	3	4	4	3	4	4	4	4	2	4	4	3	4	3	#NULL!	5	4	4	4	4	3	3	5	3	4	4	4	4	4	3.5	3.85714	4
449	100	1	1	1		1	0	1	3	2	4	4	2	4	4	2	4	3	4	4	4	3	3	3	3	2	4	4	4	4	3	#NULL!	4	4	4	4	3	#NULL!	3	3	3	4	2	2	3	4	3.83333	3.42857	3.75
451	100	1	1	1		1	0	1	3	2	3	4	2	4	4	3	3	4	4	4	3	3	4	3	5	3	3	3	3	4	3	#NULL!	5	4	3	2	2	1	3	4	3	4	1	3	3	3	3.66667	3.42857	4
453	100	1	1	1		1	0	1	3	2	2	3	2	2	4	3	3	2	4	4	3	3	3	4	3	3	3	3	3	4	2	#NULL!	4	4	4	3	4	3	3	4	3	2	2	4	3	4	3.33333	3.14286	3.5
455	100	1	1	1		1	0	1	3	2	4	4	2	4	3	3	3	3	4	3	2	3	3	3	2	2	4	3	3	4	3	#NULL!	3	3	3	3	2	3	3	3	3	3	4	3	3	3	3	3	3.25
457	100	1	1	1		1	0	1	3	2	3	3	2	4	4	3	3	3	4	3	3	3	4	4	3	4	2	3	2	3	3	#NULL!	4	3	2	2	3	4	3	4	3	3	4	3	3	4	3.33333	3	3.25
459	100	1	1	1		1	0	1	3	2	#NULL!	4	2	3	4	3	3	4	4	4	3	4	3	4	3	3	3	4	3	4	3	#NULL!	4	4	3	3	3	3	3	2	3	4	4	3	3	4	3.66667	3.42857	3.75
461	100	1	1	1		1	0	1	#NULL!	#NULL!	2	3	2	4	4	2	4	#NULL!	4	5	3	4	#NULL!	4	4	2	4	4	4	4	3	#NULL!	4	3	2	2	4	#NULL!	2	#NULL!	#NULL!	#NULL!	2	4	#NULL!	4	4	4	3.5
463	100	1	1	1		1	0	1	3	2	4	4	2	5	3	3	3	3	3	4	3	3	3	4	3	3	3	4	#NULL!	4	3	#NULL!	3	4	3	4	4	3	3	4	3	3	3	#NULL!	1	4	3.16667	3.33333	3.5
465	100	1	1	1		1	0	1	3	2	1	1	1	3	3	2	4	4	4	4	3	4	2	3	3	3	3	3	3	5	3	#NULL!	5	4	4	4	4	3	1	3	3	3	3	4	2	4	3.66667	3	4.25
467	100	1	1	1		1	0	1	3	2	2	4	2	4	4	3	3	3	3	4	2	4	3	4	4	2	4	2	3	4	3	#NULL!	4	4	4	3	4	4	2	4	3	4	2	4	3	4	3.16667	3.42857	3.75
469	100	1	1	1		1	0	1	3	2	4	4	2	5	3	2	4	3	4	4	3	4	4	4	4	3	3	4	3	5	3	#NULL!	5	4	3	2	3	2	3	5	3	2	3	3	3	4	3.5	3.71429	4.25
471	100	1	1	1		1	0	1	3	2	2	3	2	3	4	2	4	3	4	4	3	4	2	4	4	2	4	4	3	5	3	#NULL!	5	4	4	4	4	4	3	3	1	4	2	4	4	4	3.66667	3.57143	4.25
473	100	1	1	1		1	0	1	3	2	2	2	2	4	4	2	4	4	3	3	3	4	4	3	4	3	3	4	4	4	4	#NULL!	4	4	2	2	2	#NULL!	#NULL!	4	3	4	3	4	3	3	3.5	3.71429	4
475	100	1	1	1		1	0	1	3	2	4	4	2	4	4	2	4	4	5	4	4	4	2	4	3	3	3	2	3	3	4	#NULL!	3	4	4	4	4	3	2	5	3	3	4	4	1	4	4.16667	3	3.5
477	100	1	1	1		1	0	1	3	2	3	2	2	3	3	2	4	3	4	#NULL!	2	3	3	3	3	3	3	3	3	4	3	#NULL!	3	4	4	3	4	3	2	3	3	3	3	3	1	3	3.2	3	3.5
479	100	1	1	1		1	0	1	3	2	2	4	2	4	4	2	4	5	4	4	4	5	3	4	3	2	4	4	4	5	4	#NULL!	5	4	4	4	3	4	3	4	2	4	3	4	4	4	4.16667	3.85714	4.5
481	100	1	1	1		1	0	1	3	2	1	1	2	2	4	3	3	4	4	4	4	4	4	3	4	2	4	3	4	5	4	#NULL!	5	4	3	3	3	2	2	4	2	4	3	4	3	4	3.83333	3.71429	4.5
483	100	1	1	1		1	0	1	3	2	2	3	2	3	4	3	3	4	4	4	3	4	3	3	3	2	4	3	4	4	4	#NULL!	4	4	4	3	4	3	3	4	3	3	3	4	3	4	3.66667	3.42857	4
485	100	1	1	1		1	0	1	3	2	3	3	2	3	3	2	4	4	3	4	3	4	3	4	4	3	3	3	3	5	4	#NULL!	4	3	4	3	3	2	3	4	3	4	4	4	2	4	3.5	3.42857	4
487	100	1	1	1		1	0	1	3	2	1	1	2	2	4	3	3	3	4	4	4	4	3	4	3	2	4	3	3	3	4	#NULL!	4	4	3	3	2	3	3	4	#NULL!	3	4	#NULL!	3	3	3.66667	3.42857	3.75
489	100	1	1	1		1	0	1	3	2	4	4	2	4	4	2	4	4	5	4	3	4	4	4	3	2	4	4	4	4	4	#NULL!	4	4	4	3	3	2	4	4	4	4	4	4	4	4	4	3.85714	4
491	100	1	1	1		1	0	1	3	2	3	4	1	3	4	2	4	4	4	4	3	4	4	4	4	2	4	3	3	3	4	#NULL!	4	4	2	4	3	2	4	4	3	4	3	3	4	3	3.83333	3.71429	3.75
492	100	1	1	1		1	0	1	3	2	2	3	2	2	5	3	3	4	5	4	3	4	3	4	4	3	3	4	3	4	4	#NULL!	5	4	3	3	3	3	3	4	3	3	3	4	4	3	4	3.57143	4.25
493	100	1	1	1		1	0	1	3	2	3	4	2	3	2	3	3	4	5	4	2	4	3	4	4	3	3	3	3	3	3	#NULL!	3	4	2	2	3	2	3	4	3	3	3	2	3	4	3.33333	3.42857	3.25
494	100	1	1	1		1	0	1	3	2	4	4	2	3	4	3	3	4	4	4	2	4	3	4	3	3	3	4	3	4	3	#NULL!	4	4	3	2	2	3	3	3	#NULL!	3	3	3	2	4	3.5	3.42857	3.75
495	100	1	1	1		1	0	1	3	2	4	4	2	4	4	2	4	5	4	4	3	4	3	4	4	3	3	3	3	4	2	#NULL!	4	4	3	3	3	3	3	4	3	3	3	4	2	3	4	3.42857	3.5
496	100	1	1	1		1	0	1	3	2	1	3	1	3	3	3	3	3	4	3	3	3	3	3	3	3	3	3	3	4	3	#NULL!	4	3	3	3	3	4	2	3	2	3	3	3	3	3	3.16667	3	3.5
497	100	1	1	1		1	0	1	3	2	4	4	2	5	4	2	4	3	4	4	3	4	3	2	3	3	3	3	3	5	3	#NULL!	5	4	3	3	3	2	3	4	2	3	4	3	3	4	3.66667	3	4.25
498	100	1	1	1		1	0	1	3	2	3	4	2	4	3	3	3	3	3	3	3	3	3	4	3	2	4	3	3	4	3	#NULL!	4	3	4	3	3	2	3	4	3	3	4	3	3	#NULL!	3	3.28571	3.5
499	100	1	1	1		1	0	1	3	2	4	4	#NULL!	4	4	3	3	4	4	4	4	3	4	4	4	3	3	3	3	3	3	#NULL!	3	4	3	2	3	2	3	3	3	3	3	3	3	3	3.83333	3.42857	3.25
500	100	1	1	1		1	0	1	3	2	4	4	2	5	4	2	4	4	4	4	4	3	2	4	2	2	4	3	3	3	3	#NULL!	4	4	3	2	2	2	4	4	3	4	4	3	4	4	4	3	3.5
501	100	1	1	1		1	0	1	3	2	2	2	2	2	4	2	4	3	4	5	4	4	3	3	3	2	4	3	4	5	4	#NULL!	5	4	3	3	2	3	3	4	#NULL!	4	4	4	4	4	4	3.42857	4.5
502	100	1	1	1		1	0	1	3	2	4	4	1	5	3	3	3	3	4	4	3	3	3	4	3	3	3	4	3	5	4	#NULL!	4	3	2	3	3	2	3	4	3	3	4	3	4	4	3.33333	3.28571	4
503	100	1	1	1		1	0	1	3	2	4	4	2	4	4	2	4	4	4	4	4	4	4	4	4	2	4	4	4	4	4	#NULL!	4	3	2	2	2	2	4	4	3	4	4	4	4	4	4	4	3.75
504	100	1	1	1		1	0	1	3	2	2	3	2	2	4	3	3	3	4	4	3	4	3	4	4	2	4	3	3	4	3	#NULL!	4	3	2	2	3	3	3	4	2	2	4	3	3	4	3.5	3.57143	3.5
505	100	1	1	1		1	0	1	3	2	3	4	2	4	2	2	4	3	5	4	2	4	3	5	4	3	3	2	4	3	4	#NULL!	3	3	2	2	2	2	2	4	2	3	4	3	2	4	3.33333	3.57143	3.25
506	100	1	1	1		1	0	1	3	2	2	3	2	2	4	3	3	3	4	4	3	4	3	4	4	3	3	3	4	4	3	#NULL!	4	4	5	3	2	2	3	3	3	3	4	3	3	4	3.5	3.57143	3.75
507	100	1	1	1		1	0	1	3	2	4	4	2	4	4	2	4	3	4	4	3	4	2	4	3	3	3	3	3	4	3	#NULL!	4	3	2	3	3	2	3	4	3	4	3	3	4	4	3.66667	3.14286	3.5
508	100	1	1	1		1	0	1	2	1	3	4	2	4	5	2	4	5	4	4	4	4	4	5	3	2	4	4	4	5	3	#NULL!	4	5	3	4	3	2	4	3	#NULL!	3	2	4	1	4	4.33333	4	4.25
509	100	1	1	1		1	0	1	2	1	4	4	1	5	5	2	4	4	5	5	4	4	4	5	3	2	4	4	3	5	3	#NULL!	3	5	2	3	3	3	3	3	3	4	3	3	3	4	4.5	3.85714	4
510	100	1	1	1		1	0	1	2	1	4	4	1	4	4	3	3	4	3	3	3	4	4	5	3	3	3	3	3	5	2	#NULL!	5	3	4	3	3	3	2	2	4	2	1	4	4	4	3.33333	3.57143	3.75
511	100	1	1	1		1	0	1	3	2	1	3	2	3	4	#NULL!	#NULL!	3	4	4	4	4	4	3	4	2	4	4	4	4	3	#NULL!	4	4	2	2	3	2	#NULL!	#NULL!	#NULL!	3	3	#NULL!	4	4	3.8	3.85714	3.75
512	100	1	1	1		1	0	1	2	1	4	4	1	5	5	2	4	3	5	4	4	4	4	4	3	2	4	3	3	5	2	#NULL!	4	4	3	3	3	3	4	4	2	3	4	4	4	4	4.16667	3.57143	3.75
513	100	1	1	1		1	0	1	2	1	2	2	1	3	4	1	5	4	4	5	4	5	5	5	4	1	5	5	5	5	4	#NULL!	5	4	4	3	4	3	3	5	3	3	3	3	4	4	4.33333	4.85714	4.5
514	100	1	1	1		1	0	1	2	1	3	4	1	4	3	2	4	4	5	5	4	4	4	4	5	2	4	4	3	5	4	#NULL!	5	4	3	2	2	1	3	4	3	3	3	3	4	4	4.16667	4	4.5
515	100	1	1	1		1	0	1	2	1	3	3	2	4	4	3	3	3	3	4	3	4	4	4	3	3	3	4	3	4	3	#NULL!	4	3	3	3	3	2	3	4	2	3	3	3	3	3	3.33333	3.57143	3.5
516	100	1	1	1		1	0	1	3	2	4	4	2	4	3	3	3	2	4	4	3	3	4	4	3	3	3	3	3	4	3	#NULL!	4	3	3	3	3	3	2	4	3	3	2	3	3	3	3.16667	3.28571	3.5
517	100	1	1	1		1	0	1	3	2	4	4	1	4	3	2	4	3	2	3	2	3	3	3	3	3	3	3	3	3	3	#NULL!	3	3	4	3	4	4	3	3	3	3	3	3	3	3	2.83333	3	3
518	100	1	1	1		1	0	1	3	2	2	4	2	2	4	2	4	3	4	4	3	4	1	5	3	3	3	4	4	3	3	#NULL!	4	3	3	4	3	3	3	3	1	1	1	3	3	2	3.66667	3.42857	3.25
519	100	1	1	1		1	0	1	3	2	4	#NULL!	2	3	2	3	3	3	4	4	3	4	4	4	#NULL!	3	3	3	3	4	4	#NULL!	4	3	#NULL!	3	5	4	3	4	3	4	#NULL!	3	3	2	3.16667	3.5	3.75
520	100	1	1	1		1	0	1	3	2	4	4	2	3	4	2	4	3	4	4	3	4	4	4	4	3	3	3	3	4	3	#NULL!	4	3	4	2	3	4	3	4	2	3	3	4	3	3	3.66667	3.57143	3.5
521	100	1	1	1		1	0	1	3	2	2	2	2	2	4	1	5	4	5	5	3	3	4	4	5	3	3	4	3	5	4	#NULL!	5	3	4	3	3	2	3	4	3	3	1	4	4	3	4.33333	3.71429	4.25
522	100	1	1	1		1	0	1	3	2	2	4	2	4	4	3	3	3	3	3	3	3	3	4	3	3	3	4	3	3	3	#NULL!	4	3	3	3	2	3	2	3	3	4	3	3	3	3	3.16667	3.28571	3.25
523	105	1	1	4		1	0	1	3	2	#NULL!	3	2	5	4	3	3	4	4	3	3	3	4	3	3	2	4	3	3	4	3	#NULL!	4	3	2	2	3	2	3	4	3	3	3	4	#NULL!	3	3.5	3.28571	3.5
524	105	1	1	4		1	0	1	3	2	3	3	2	3	5	1	5	4	5	3	3	5	3	5	3	1	5	3	4	5	3	#NULL!	4	3	3	3	2	2	3	4	3	4	4	3	4	4	4.16667	4	3.75
525	105	1	1	4		1	0	1	3	2	3	3	#NULL!	#NULL!	4	2	4	4	4	4	3	4	4	4	3	2	4	5	4	4	3	#NULL!	4	4	2	3	2	3	3	4	3	3	3	4	4	4	3.83333	4	3.75
526	105	1	1	4		1	0	1	3	2	2	4	2	3	4	2	4	4	4	4	3	4	4	4	4	2	4	4	4	4	2	#NULL!	4	4	3	2	3	2	3	3	4	2	3	3	3	4	3.83333	4	3.5
527	105	1	1	4		1	0	1	3	2	4	4	1	5	4	2	4	4	4	4	4	4	4	4	4	2	4	4	4	4	4	#NULL!	4	4	3	2	3	3	4	4	4	4	4	4	3	4	4	4	4
528	105	1	1	4		1	0	1	3	2	4	4	2	4	4	3	3	3	4	4	3	4	3	4	4	3	3	4	3	4	3	#NULL!	4	3	3	2	3	2	3	3	3	3	2	3	3	3	3.5	3.57143	3.5
529	105	1	1	4		1	0	1	3	2	4	4	2	3	5	2	4	4	5	4	3	4	3	4	4	2	4	4	3	4	3	#NULL!	4	3	3	2	2	3	3	3	3	3	3	3	3	4	4.16667	3.71429	3.5
530	105	1	1	4		1	0	1	3	2	1	2	2	2	4	2	4	4	5	4	3	4	3	4	4	2	4	4	3	5	3	#NULL!	4	4	2	2	2	2	3	4	3	4	3	3	2	3	4	3.71429	4
531	105	1	1	4		1	0	1	#NULL!	#NULL!	2	2	1	5	4	3	3	2	3	3	3	2	3	4	3	3	3	3	3	3	3	#NULL!	3	4	3	3	3	3	3	3	3	3	3	3	3	3	3	3	3.25
532	105	1	1	4		1	0	1	3	2	2	4	1	4	4	2	4	3	4	4	3	4	4	4	3	3	3	3	3	4	3	#NULL!	4	4	3	2	3	3	3	3	3	3	3	3	3	3	3.66667	3.42857	3.75
533	105	1	1	4		1	0	1	3	2	3	3	2	5	4	2	4	4	4	4	3	3	3	4	3	2	4	3	3	4	4	#NULL!	4	4	2	2	2	2	3	4	#NULL!	4	3	#NULL!	#NULL!	4	3.83333	3.28571	4
534	105	1	1	4		1	0	1	3	2	3	4	2	4	3	3	3	3	3	2	3	3	3	4	4	3	3	3	3	4	3	#NULL!	5	3	3	2	3	2	3	4	3	4	3	3	3	4	2.83333	3.28571	3.75
535	105	1	1	4		1	0	1	3	2	2	4	2	3	4	2	4	4	4	4	3	4	4	4	4	2	4	3	4	5	4	#NULL!	4	4	3	2	3	2	3	4	3	4	4	4	3	4	3.83333	3.85714	4.25
536	105	1	1	4		1	0	1	3	2	2	3	2	2	4	2	4	4	4	4	4	5	3	3	4	2	4	4	4	4	3	#NULL!	5	4	2	2	2	1	1	3	2	4	4	4	3	4	4	3.85714	4
537	105	1	1	4		1	0	1	3	2	3	4	2	3	4	3	3	4	4	4	4	5	4	4	4	3	3	3	3	4	#NULL!	#NULL!	4	#NULL!	3	4	3	#NULL!	#NULL!	3	2	#NULL!	3	#NULL!	#NULL!	#NULL!	3.83333	3.71429	4
538	105	1	1	4		1	0	1	3	2	2	4	2	5	4	3	3	3	3	3	3	3	2	3	3	2	4	3	#NULL!	4	3	#NULL!	4	3	4	3	4	3	3	#NULL!	2	2	3	2	3	3	3.16667	3	3.5
539	105	1	1	4		1	0	1	3	2	4	4	2	3	3	3	3	2	4	3	3	4	3	3	3	#NULL!	#NULL!	2	3	2	3	#NULL!	4	5	#NULL!	2	2	2	3	4	2	2	2	3	3	3	3	3	3.5
540	105	1	1	4		1	0	1	3	2	#NULL!	4	2	4	4	2	4	4	4	4	3	3	3	3	3	2	4	3	4	4	3	#NULL!	4	4	3	2	3	2	3	#NULL!	2	4	3	#NULL!	#NULL!	4	3.83333	3.28571	3.75
541	105	1	1	4		1	0	1	3	2	2	3	2	2	3	2	4	3	4	4	3	3	2	4	2	2	4	3	3	4	2	#NULL!	4	4	2	2	2	2	3	4	3	3	3	3	3	3	3.5	3	3.5
542	105	1	1	4		1	0	1	3	2	2	2	2	2	4	2	4	4	4	4	4	4	4	4	4	1	5	4	4	5	4	#NULL!	5	4	4	3	3	3	3	4	3	4	3	4	4	4	4	4.14286	4.5
543	105	1	1	4		1	0	1	3	2	2	4	1	4	4	1	5	5	4	5	4	5	3	5	5	2	4	4	3	4	2	#NULL!	5	4	4	5	5	2	2	4	4	3	5	4	2	4	4.5	4.14286	3.75
544	105	1	1	4		1	0	1	3	2	2	3	2	2	4	4	2	4	4	4	#NULL!	4	3	3	3	#NULL!	#NULL!	3	4	4	#NULL!	#NULL!	4	4	3	3	#NULL!	2	3	4	3	#NULL!	#NULL!	3	#NULL!	3	3.6	3.33333	4
545	105	1	1	4		1	0	1	3	2	3	3	2	3	5	3	3	3	4	4	4	4	4	3	3	3	3	4	4	5	3	#NULL!	5	3	2	2	2	2	4	4	3	3	3	4	2	3	3.83333	3.57143	4
546	100	1	1	1		1	0	1	3	2	2	4	2	3	4	2	4	4	4	4	3	4	3	4	3	2	4	3	3	3	2	#NULL!	3	3	2	3	4	2	2	4	3	3	4	3	3	3	3.83333	3.42857	2.75
547	100	1	1	1		1	0	1	3	2	2	2	2	3	4	2	4	3	4	4	3	4	4	3	3	2	4	4	4	4	3	#NULL!	4	4	3	2	3	2	3	3	3	3	4	3	3	4	3.66667	3.71429	3.75
548	100	1	1	1		1	0	1	3	2	2	2	2	2	4	2	4	4	4	4	4	4	4	4	4	2	4	3	4	4	#NULL!	#NULL!	4	3	3	3	3	3	3	4	#NULL!	3	3	3	3	4	4	3.85714	3.66667
549	100	1	1	1		1	0	1	3	2	4	4	2	#NULL!	5	2	4	4	4	4	3	4	3	3	2	2	4	3	4	3	3	#NULL!	4	4	2	3	3	3	2	4	3	4	3	3	4	4	4	3.28571	3.5
550	100	1	1	1		1	0	1	3	2	1	3	2	2	4	3	3	3	4	3	3	3	3	3	3	2	4	3	3	4	3	#NULL!	4	4	3	3	2	3	3	4	3	3	3	3	3	4	3.33333	3.14286	3.75
551	100	1	1	1		1	0	1	3	2	4	4	2	5	4	3	3	4	4	4	4	4	3	3	4	3	3	4	4	4	3	#NULL!	4	3	2	3	3	2	3	4	3	3	3	4	3	4	3.83333	3.57143	3.5
552	100	1	1	1		1	0	1	3	2	4	4	2	4	2	2	4	3	4	4	2	4	3	4	2	3	3	4	3	3	3	#NULL!	4	3	#NULL!	2	4	2	3	2	2	3	5	3	2	3	3.16667	3.28571	3.25
553	100	1	1	1		1	0	1	3	2	1	1	2	4	3	3	3	3	5	4	3	4	4	3	4	4	2	4	3	5	3	#NULL!	5	3	4	3	4	3	3	4	3	3	3	3	3	4	3.5	3.42857	4
554	100	1	1	1		1	0	1	3	2	2	2	2	2	4	3	3	3	5	4	4	4	4	5	3	3	3	4	3	5	4	#NULL!	5	4	2	3	3	4	3	3	3	4	3	4	3	3	3.83333	3.71429	4.5
555	100	1	1	1		1	0	1	2	1	3	4	1	4	5	2	4	4	3	4	3	4	4	4	3	3	3	4	3	4	3	#NULL!	4	4	3	3	4	3	2	3	1	2	3	3	4	2	3.83333	3.57143	3.75
556	100	1	1	1		1	0	1	3	2	4	4	2	4	4	2	4	3	4	4	3	3	3	4	3	2	4	3	3	4	3	#NULL!	4	3	3	4	4	4	4	4	2	3	3	3	3	4	3.66667	3.28571	3.5
557	100	1	1	1		1	0	1	3	2	3	3	2	3	4	2	4	3	4	3	3	3	3	3	3	3	3	4	3	3	3	#NULL!	4	4	2	3	2	2	3	4	2	2	3	3	3	4	3.5	3.14286	3.5
558	100	1	1	1		1	0	1	3	2	4	4	2	5	3	3	3	3	4	4	3	3	3	4	2	3	3	3	4	4	3	#NULL!	3	4	4	3	4	4	3	4	3	3	3	3	3	4	3.33333	3.14286	3.5
559	100	1	1	1		1	0	1	3	2	2	2	1	3	5	2	4	3	4	4	3	4	3	4	3	2	4	3	3	5	4	#NULL!	5	4	3	3	2	2	3	5	3	3	3	4	3	4	3.83333	3.42857	4.5
560	100	1	1	1		1	0	1	3	2	4	3	2	4	5	3	3	4	4	1	3	4	3	4	2	3	3	3	3	4	2	#NULL!	4	4	3	4	2	3	3	5	3	4	3	4	3	4	3.33333	3.14286	3.5
561	100	1	1	1		1	0	1	3	2	3	3	2	4	3	3	3	3	3	3	3	3	3	3	3	2	4	3	3	3	3	#NULL!	4	3	5	3	4	3	2	4	2	2	2	3	3	4	3	3.14286	3.25
562	100	1	1	1		1	0	1	3	2	3	4	2	3	4	2	4	4	5	4	3	4	3	4	3	2	4	3	3	4	3	#NULL!	5	4	3	3	3	2	3	4	3	3	4	4	4	4	4	3.42857	4
563	100	1	1	1		1	0	1	3	2	2	2	2	2	4	1	5	4	4	5	4	5	4	4	3	1	5	3	3	4	3	#NULL!	5	5	4	3	2	3	3	4	3	4	4	3	4	4	4.33333	3.85714	4.25
564	100	1	1	1		1	0	1	3	2	#NULL!	#NULL!	2	2	4	2	4	2	3	4	3	4	4	4	4	1	5	2	4	4	3	#NULL!	4	4	2	3	3	2	3	3	3	2	4	4	2	4	3.33333	3.85714	3.75
565	100	1	1	1		1	0	1	3	2	3	4	2	3	4	3	3	4	4	4	3	4	4	2	3	2	4	3	4	4	3	#NULL!	4	4	3	2	3	4	3	3	3	3	3	3	2	3	3.66667	3.42857	3.75
566	100	1	1	1		1	0	1	3	2	2	4	2	4	4	4	2	3	4	4	3	4	4	4	3	2	4	4	4	4	3	#NULL!	4	3	3	3	3	3	3	4	3	3	3	3	3	3	3.33333	3.85714	3.5
567	100	1	1	1		1	0	1	3	2	4	4	2	4	4	3	3	3	4	4	3	4	3	3	3	2	4	3	4	3	3	#NULL!	4	3	3	4	3	3	3	4	2	2	3	3	3	3	3.5	3.42857	3.25
568	100	1	1	1		1	0	1	2	1	2	2	2	3	4	2	4	2	4	4	4	3	3	2	3	3	3	3	3	5	2	#NULL!	5	4	4	4	4	2	2	4	2	3	3	3	4	4	3.66667	2.85714	4
569	100	1	1	1		1	0	1	2	1	4	4	1	5	4	2	4	4	4	4	4	4	4	4	3	2	4	4	4	4	3	#NULL!	4	4	3	2	2	3	3	4	4	4	4	4	4	4	4	3.85714	3.75
570	100	1	1	1		1	0	1	2	1	#NULL!	#NULL!	#NULL!	#NULL!	4	2	4	4	4	3	4	4	3	4	4	2	4	3	3	4	2	#NULL!	4	4	3	3	2	#NULL!	1	3	3	2	2	2	3	4	3.83333	3.57143	3.5
571	100	1	1	1		1	0	1	2	1	3	3	1	5	5	2	4	4	4	4	3	4	4	4	3	2	4	4	4	5	3	#NULL!	5	4	4	4	3	4	2	3	2	3	3	3	4	4	4	3.85714	4.25
572	100	1	1	1		1	0	1	2	1	3	4	2	4	4	3	3	4	4	4	3	3	3	4	4	2	4	2	3	4	3	#NULL!	4	4	4	3	3	4	3	4	3	3	3	3	3	3	3.66667	3.28571	3.75
573	100	1	1	1		1	0	1	2	1	1	3	1	3	4	2	4	4	4	4	4	4	4	3	4	2	4	4	4	4	3	#NULL!	4	4	4	3	3	2	2	3	3	3	3	4	3	3	4	3.85714	3.75
574	100	1	1	1		1	0	1	3	2	3	3	2	3	4	3	3	3	4	3	3	3	3	3	3	3	3	3	3	4	3	#NULL!	3	2	4	3	3	2	2	4	3	2	3	2	3	4	3.33333	3	3
575	100	1	1	1		1	0	1	3	2	4	4	2	3	4	2	4	2	3	4	2	3	3	4	3	3	3	2	2	4	3	#NULL!	4	2	4	4	3	3	3	4	3	3	4	4	2	4	3.16667	2.85714	3.25
576	100	1	1	1		1	0	1	3	2	2	2	2	4	4	2	4	4	4	4	3	4	3	4	3	3	3	4	4	4	3	#NULL!	4	4	3	3	3	3	3	4	3	3	3	4	3	4	3.83333	3.57143	3.75
577	1	4	2	2	6/18/2012 8:14:54 AM	1	1	1	#NULL!	#NULL!	4	4	2	5	1	3	3	4	4	3	3	4	3	5	2	2	4	4	4	5	4	#NULL!	4	4	2	3	3	#NULL!	3	4	2	3	3	3	3	4	3	3.71429	4.25
578	1	4	2	2	6/20/2012 11:40:24 PM	1	1	1	1	1	2	2	1	4	4	3	3	3	3	3	3	3	3	3	2	4	2	4	3	4	3	#NULL!	5	2	4	3	4	4	3	4	3	3	3	3	4	3	3.16667	2.85714	3.5
579	1	4	2	2	6/21/2012 7:05:12 AM	1	1	1	4	#NULL!	3	4	2	2	3	2	4	4	3	4	4	3	3	4	3	2	4	3	3	4	2	#NULL!	4	2	5	4	2	4	1	3	3	3	3	3	3	2	3.66667	3.28571	3
580	1	4	2	2	6/21/2012 8:15:00 AM	1	1	1	1	1	2	2	1	4	5	2	4	5	5	5	4	5	5	3	3	2	4	4	4	3	3	#NULL!	3	2	2	3	2	3	3	4	4	3	3	3	3	4	4.66667	4	2.75
581	1	4	2	2	6/21/2012 8:37:41 AM	1	1	1	1	1	3	3	2	4	4	2	4	3	5	4	4	4	3	4	3	2	4	5	3	5	3	#NULL!	5	4	4	3	3	3	3	3	3	3	4	3	3	3	4	3.71429	4.25
582	1	4	2	2	6/21/2012 8:46:29 AM	1	1	1	#NULL!	#NULL!	4	4	2	4	3	3	3	3	3	3	3	3	3	4	3	3	3	3	3	4	3	#NULL!	3	2	2	2	2	2	3	4	2	3	3	3	3	3	3	3.14286	3
583	1	4	2	2	6/21/2012 8:49:09 AM	1	1	1	#NULL!	#NULL!	#NULL!	#NULL!	#NULL!	#NULL!	4	4	2	#NULL!	4	4	4	#NULL!	#NULL!	4	#NULL!	2	4	4	4	#NULL!	#NULL!	#NULL!	#NULL!	3	#NULL!	#NULL!	#NULL!	#NULL!	#NULL!	#NULL!	#NULL!	#NULL!	#NULL!	#NULL!	#NULL!	#NULL!	3.6	4	3
584	1	4	2	2	6/21/2012 8:57:22 AM	1	1	1	1	1	4	4	1	5	4	3	3	4	5	5	3	4	3	4	4	4	2	4	3	5	3	#NULL!	4	3	2	1	3	2	3	5	2	4	4	4	4	4	4	3.42857	3.75
585	1	4	2	2	6/21/2012 12:00:36 PM	1	1	1	#NULL!	#NULL!	4	4	2	3	3	3	3	2	3	4	3	3	2	3	2	3	3	3	3	3	3	#NULL!	3	3	2	3	2	3	2	3	2	3	4	3	3	3	3	2.71429	3
586	1	4	2	2	6/21/2012 1:26:57 PM	1	1	1	#NULL!	#NULL!	3	4	1	4	4	2	4	3	4	3	#NULL!	4	#NULL!	3	2	2	4	3	4	3	3	#NULL!	4	3	4	2	2	#NULL!	2	3	3	2	4	3	4	4	3.6	3.33333	3.25
587	1	4	2	2	6/21/2012 1:34:08 PM	1	1	1	4	#NULL!	4	4	2	3	4	3	3	3	3	4	2	3	3	4	2	3	3	3	3	4	2	#NULL!	4	3	3	3	3	3	2	4	3	3	2	2	3	4	3.16667	3	3.25
588	1	4	2	2	6/21/2012 3:37:51 PM	1	1	1	3	2	3	3	2	3	3	3	3	3	3	3	3	3	3	3	2	2	4	2	3	3	3	#NULL!	3	2	4	3	3	3	3	3	2	3	2	3	3	3	3	2.85714	2.75
589	1	4	2	2	6/21/2012 6:18:44 PM	1	1	1	3	2	2	2	2	2	4	3	3	4	4	4	3	4	3	4	5	3	3	3	4	4	4	#NULL!	5	3	4	4	4	4	3	4	2	2	3	4	3	3	3.66667	3.71429	4
590	1	4	2	2	6/22/2012 3:05:06 PM	1	1	1	3	2	2	4	2	3	2	3	3	3	3	3	3	3	3	3	3	3	3	3	3	4	3	#NULL!	4	3	2	2	2	3	3	4	3	3	3	3	3	3	2.83333	3	3.5
591	1	4	2	2	6/22/2012 5:55:54 PM	1	1	1	3	2	1	1	2	2	3	3	3	3	3	3	2	3	3	3	3	3	3	3	3	4	3	#NULL!	5	3	5	3	3	3	2	3	3	2	1	2	3	3	2.83333	3	3.75
592	1	4	2	2	6/23/2012 10:07:51 AM	1	1	1	3	2	3	4	2	4	3	3	3	3	3	3	3	3	4	3	2	4	2	3	2	4	3	#NULL!	4	3	3	2	2	3	3	4	2	3	3	2	3	2	3	2.71429	3.5
593	1	4	2	2	6/23/2012 8:09:30 PM	1	1	1	1	1	3	3	2	4	5	2	4	3	3	4	3	5	3	3	3	2	4	3	3	4	4	#NULL!	5	3	4	3	4	2	3	3	3	3	3	4	4	4	3.66667	3.42857	4
594	1	4	2	2	6/24/2012 11:07:33 AM	1	1	1	4	#NULL!	4	4	1	5	3	2	4	3	3	3	3	4	4	4	3	3	3	4	3	4	3	#NULL!	5	3	4	3	3	4	3	3	3	3	3	3	4	4	3.16667	3.57143	3.75
595	1	4	2	2	6/24/2012 2:01:16 PM	1	1	1	1	1	2	2	1	3	4	4	2	4	4	4	4	4	4	4	3	2	4	4	4	4	4	#NULL!	4	4	4	4	3	4	4	3	4	4	4	4	4	4	3.66667	3.85714	4
596	1	4	2	2	6/24/2012 9:38:51 PM	1	1	1	3	2	4	4	2	3	4	4	2	3	4	3	3	3	3	5	2	2	4	3	3	3	3	#NULL!	3	2	2	2	2	2	3	3	3	2	3	2	4	3	3.16667	3.28571	2.75
597	1	4	2	2	6/25/2012 12:01:27 PM	1	1	1	3	2	3	3	2	3	3	3	3	3	3	3	3	4	3	3	3	4	2	2	2	4	3	#NULL!	3	3	5	2	3	3	2	3	3	3	2	3	2	3	3	2.71429	3.25
598	1	4	2	2	6/25/2012 12:05:44 PM	1	1	1	#NULL!	#NULL!	2	2	2	2	3	3	3	2	3	3	3	3	3	4	4	3	3	3	2	4	3	#NULL!	4	3	3	3	3	3	3	3	3	3	3	3	3	3	2.83333	3.14286	3.5
599	1	4	2	2	6/25/2012 1:37:48 PM	1	1	1	3	2	4	4	2	#NULL!	3	3	3	3	4	4	3	4	4	4	2	4	2	3	3	4	3	#NULL!	5	2	4	2	3	4	3	5	3	2	3	3	3	4	3.33333	3.14286	3.5
600	1	4	2	2	6/25/2012 1:38:30 PM	1	1	1	3	2	4	4	2	2	4	2	4	3	3	4	4	2	4	#NULL!	4	2	4	4	4	4	3	#NULL!	4	3	4	4	3	4	2	4	3	2	4	2	2	2	3.66667	3.66667	3.5
601	1	4	2	2	6/25/2012 1:41:14 PM	1	1	1	3	2	4	4	2	5	3	2	4	4	4	3	4	4	4	4	4	2	4	3	4	4	3	#NULL!	4	4	2	3	2	3	3	4	3	4	4	3	4	4	3.66667	3.85714	3.75
602	1	4	2	2	6/25/2012 1:51:05 PM	1	1	1	#NULL!	#NULL!	2	4	2	3	3	3	3	3	3	3	3	3	#NULL!	3	1	3	3	3	3	2	4	#NULL!	3	3	2	2	3	2	1	#NULL!	1	1	3	3	4	3	3	2.66667	3
603	1	4	2	2	6/25/2012 2:27:52 PM	1	1	1	3	2	2	2	2	2	3	3	3	3	3	3	3	3	3	#NULL!	2	3	3	3	3	4	3	#NULL!	4	3	4	3	3	3	3	3	3	2	2	4	3	4	3	2.83333	3.5
604	1	4	2	2	6/26/2012 10:46:15 AM	1	1	1	3	2	4	4	2	4	4	2	4	3	4	4	4	4	3	4	4	2	4	3	3	4	3	#NULL!	4	3	2	2	2	3	3	4	2	3	3	3	4	4	3.83333	3.57143	3.5
605	1	4	2	2	6/26/2012 2:48:33 PM	1	1	1	4	#NULL!	4	4	2	4	3	3	3	2	3	3	2	4	3	4	3	3	3	2	2	4	3	#NULL!	4	3	3	3	3	3	1	4	3	3	4	2	3	4	2.66667	3	3.5
606	1	4	2	2	6/26/2012 7:28:15 PM	1	1	1	4	#NULL!	3	3	2	2	3	3	3	3	4	3	2	4	3	4	3	3	3	3	3	5	3	#NULL!	5	3	2	4	2	3	3	5	2	3	3	3	3	3	3	3.28571	4
607	1	4	2	2	6/26/2012 7:47:59 PM	1	1	1	1	1	4	4	1	5	5	2	4	4	5	4	3	3	3	4	2	3	3	2	3	4	3	#NULL!	5	3	2	3	3	3	3	4	3	3	3	3	4	4	4.16667	2.85714	3.75
608	1	4	2	2	6/27/2012 10:54:25 AM	1	1	1	4	#NULL!	4	4	1	5	2	3	3	4	4	4	4	4	4	4	2	2	4	4	4	2	3	#NULL!	3	2	5	4	2	5	2	4	3	3	2	4	3	4	3.5	3.71429	2.5
609	1	4	2	2	6/27/2012 2:23:05 PM	1	1	1	4	#NULL!	2	2	1	2	4	2	4	1	4	4	1	4	3	4	4	2	4	3	3	5	3	#NULL!	5	3	4	4	2	3	3	3	1	1	3	5	4	5	3	3.57143	4
610	1	4	2	2	6/27/2012 3:41:50 PM	1	1	1	#NULL!	#NULL!	2	2	2	2	3	3	3	3	4	3	3	3	3	4	3	3	3	3	4	5	3	#NULL!	5	4	2	2	2	2	3	3	3	3	3	3	4	3	3.16667	3.28571	4.25
611	1	4	2	2	6/27/2012 4:17:28 PM	1	1	1	1	1	2	2	2	3	4	4	2	4	4	4	4	5	4	4	4	2	4	4	3	5	3	#NULL!	5	4	2	2	3	2	3	3	3	4	3	4	4	3	3.66667	4	4.25
612	1	4	2	2	6/27/2012 8:44:19 PM	1	1	1	3	2	2	2	2	4	4	2	4	3	4	4	2	3	3	4	3	4	2	4	3	4	4	#NULL!	4	3	4	3	4	4	4	4	2	4	4	3	3	4	3.5	3.14286	3.75
613	1	4	2	2	6/28/2012 8:52:04 AM	1	1	1	#NULL!	#NULL!	2	3	2	2	3	2	4	3	4	3	2	3	4	3	1	3	3	3	4	4	3	#NULL!	4	3	2	3	2	2	2	3	3	2	3	3	3	4	3.16667	3	3.5
614	1	4	2	2	6/28/2012 10:02:25 AM	1	1	1	4	#NULL!	4	4	2	4	3	3	3	3	3	3	3	4	3	3	2	3	3	3	3	3	4	#NULL!	4	3	4	3	2	2	3	3	3	3	3	3	3	4	3	3	3.5
615	1	4	2	2	6/28/2012 1:59:32 PM	1	1	1	3	2	3	3	2	5	4	2	4	3	4	4	3	4	4	3	2	4	2	3	3	5	3	#NULL!	5	2	3	3	2	3	1	3	3	3	1	3	3	3	3.66667	3	3.75
616	1	4	2	2	6/29/2012 8:00:53 AM	1	1	1	4	#NULL!	3	3	2	3	3	2	4	2	3	3	3	4	2	2	1	2	4	3	3	3	2	#NULL!	4	2	2	3	3	1	1	3	2	2	3	1	2	4	3	2.71429	2.75
617	1	4	2	2	40915.888784722221	1	1	1	#NULL!	#NULL!	#NULL!	#NULL!	#NULL!	#NULL!	#NULL!	#NULL!	#NULL!	#NULL!	#NULL!	#NULL!	#NULL!	#NULL!	#NULL!	#NULL!	#NULL!	#NULL!	#NULL!	#NULL!	#NULL!	#NULL!	#NULL!	#NULL!	#NULL!	#NULL!	#NULL!	#NULL!	#NULL!	#NULL!	#NULL!	#NULL!	#NULL!	#NULL!	#NULL!	#NULL!	#NULL!	#NULL!	#NULL!	#NULL!	#NULL!
618	1	4	2	2	40946.362997685188	1	1	1	3	2	4	4	2	4	3	3	3	2	3	4	2	3	2	3	3	4	2	2	2	5	2	#NULL!	5	2	2	2	2	2	3	3	4	3	3	2	2	3	2.83333	2.42857	3.5
619	1	4	2	2	40946.533217592594	1	1	1	#NULL!	#NULL!	#NULL!	#NULL!	#NULL!	#NULL!	2	#NULL!	#NULL!	#NULL!	3	#NULL!	2	#NULL!	#NULL!	#NULL!	#NULL!	2	4	#NULL!	4	#NULL!	#NULL!	#NULL!	#NULL!	3	#NULL!	#NULL!	#NULL!	#NULL!	#NULL!	#NULL!	#NULL!	#NULL!	#NULL!	#NULL!	#NULL!	#NULL!	2.33333	4	3
620	1	4	2	2	40975.349374999998	1	1	1	3	2	4	4	1	5	4	3	3	4	3	4	3	4	3	5	3	2	4	4	2	4	3	#NULL!	4	3	4	3	3	3	3	3	3	3	3	3	3	3	3.5	3.57143	3.5
622	1	4	2	2	41006.431967592594	1	1	1	#NULL!	#NULL!	1	1	2	2	4	3	3	4	4	4	3	4	3	4	4	2	4	3	3	4	3	#NULL!	4	4	3	3	2	2	3	3	3	3	3	3	3	3	3.66667	3.57143	3.75
623	1	4	2	2	41006.497731481482	1	1	1	3	2	3	3	2	2	3	4	2	3	3	3	2	3	2	3	4	3	3	3	1	3	2	#NULL!	4	1	5	4	4	3	2	4	2	3	1	3	4	4	2.66667	2.71429	2.5
624	1	4	2	2	41006.596828703703	1	1	1	1	1	4	4	1	4	4	3	3	3	4	4	3	4	3	4	3	3	3	4	4	4	3	#NULL!	4	3	3	4	4	3	3	3	2	4	4	3	4	3	3.5	3.57143	3.5
625	1	4	2	2	41067.498796296299	1	1	1	3	2	1	1	2	3	#NULL!	3	3	#NULL!	4	4	4	2	3	3	4	3	3	4	3	3	3	#NULL!	4	3	3	2	#NULL!	3	#NULL!	#NULL!	#NULL!	2	4	3	#NULL!	#NULL!	3.75	3.14286	3.25
626	1	4	2	2	41067.558946759258	1	1	1	#NULL!	#NULL!	#NULL!	#NULL!	#NULL!	#NULL!	#NULL!	#NULL!	#NULL!	#NULL!	#NULL!	#NULL!	#NULL!	#NULL!	#NULL!	#NULL!	#NULL!	#NULL!	#NULL!	#NULL!	#NULL!	#NULL!	#NULL!	#NULL!	#NULL!	#NULL!	#NULL!	#NULL!	#NULL!	#NULL!	#NULL!	#NULL!	#NULL!	#NULL!	#NULL!	#NULL!	#NULL!	#NULL!	#NULL!	#NULL!	#NULL!
627	1	4	2	2	41067.611354166664	1	1	1	#NULL!	#NULL!	2	3	2	4	3	4	2	3	3	4	3	4	4	4	2	2	4	4	3	4	3	#NULL!	4	4	3	3	3	2	3	4	3	3	4	3	4	3	3	3.57143	3.75
628	1	4	2	2	41128.673391203702	1	1	1	3	2	4	4	2	5	3	3	3	2	3	4	3	4	4	4	3	2	4	3	3	4	4	#NULL!	4	2	2	2	2	2	2	4	4	4	4	3	2	4	3	3.57143	3.5
629	1	4	2	2	41159.427037037036	1	1	1	4	#NULL!	3	3	2	3	3	3	3	3	3	3	2	3	3	3	2	4	2	3	2	4	2	#NULL!	4	2	3	3	3	3	3	4	2	2	3	3	3	4	2.83333	2.57143	3
630	1	4	2	2	41189.355787037035	1	1	1	4	#NULL!	4	4	1	5	2	3	3	3	4	4	3	4	4	4	3	3	3	4	3	4	4	#NULL!	4	4	3	2	5	4	3	4	3	2	4	4	3	4	3.16667	3.57143	4
631	1	4	2	2	41189.358171296299	1	1	1	4	#NULL!	2	2	1	2	3	2	4	2	3	4	3	3	3	3	3	3	3	3	2	4	3	#NULL!	3	2	3	2	2	2	3	4	2	2	2	3	3	4	3.16667	2.85714	3
632	1	4	2	2	41189.599861111114	1	1	1	3	2	4	4	2	3	3	4	2	2	3	3	2	3	3	3	3	4	2	2	3	4	3	#NULL!	4	2	3	2	3	3	3	4	3	2	3	3	3	3	2.5	2.71429	3.25
633	1	4	2	2	41189.620405092595	1	1	1	1	1	4	4	1	5	4	2	4	3	4	4	4	4	4	4	4	2	4	4	4	4	4	#NULL!	3	4	3	2	3	3	3	4	3	3	4	3	4	3	3.83333	4	3.75
634	1	4	2	2	41220.492754629631	1	1	1	4	#NULL!	3	2	2	2	3	3	3	2	3	4	3	2	2	3	1	3	3	2	2	3	3	#NULL!	3	4	3	5	2	3	2	3	1	2	2	2	4	3	3	2.14286	3.25
635	1	4	2	2	41250.454976851855	1	1	1	1	1	4	4	2	5	4	1	5	3	4	5	4	4	3	4	3	1	5	4	3	4	3	#NULL!	4	3	3	3	2	3	2	4	2	2	4	3	3	3	4.16667	3.71429	3.5
636	1	4	2	2	41250.59652777778	1	1	1	#NULL!	#NULL!	4	4	2	5	4	4	2	3	4	4	3	4	3	4	3	2	4	4	4	4	3	#NULL!	4	4	3	2	3	3	#NULL!	3	2	3	4	3	3	4	3.33333	3.71429	3.75
637	1	4	2	2	41250.77621527778	1	1	1	3	2	4	4	2	3	3	3	3	2	3	3	2	4	3	3	2	5	1	3	2	3	3	#NULL!	4	2	2	4	3	2	2	4	2	2	3	3	3	4	2.66667	2.57143	3
638	1	4	2	2	41250.804583333331	1	1	1	4	#NULL!	4	2	2	4	3	4	2	2	3	4	1	2	1	4	2	4	2	2	1	3	3	#NULL!	4	1	2	4	4	4	3	3	4	2	4	2	2	4	2.5	2	2.75
639	1	4	2	2	7/13/2012 8:42:32 AM	1	1	1	#NULL!	#NULL!	#NULL!	#NULL!	#NULL!	#NULL!	#NULL!	#NULL!	#NULL!	#NULL!	#NULL!	#NULL!	#NULL!	#NULL!	#NULL!	#NULL!	#NULL!	#NULL!	#NULL!	#NULL!	#NULL!	#NULL!	#NULL!	#NULL!	#NULL!	#NULL!	#NULL!	#NULL!	#NULL!	#NULL!	#NULL!	#NULL!	#NULL!	#NULL!	#NULL!	#NULL!	#NULL!	#NULL!	#NULL!	#NULL!	#NULL!
640	1	4	2	2	7/13/2012 8:50:33 AM	1	1	1	3	2	2	4	2	3	2	4	2	1	1	2	2	2	2	4	1	4	2	1	1	5	2	#NULL!	5	1	5	5	5	5	3	4	3	2	3	2	2	2	1.66667	1.85714	3.25
641	1	4	2	2	7/13/2012 2:15:51 PM	1	1	1	4	#NULL!	2	2	2	3	3	3	3	3	3	3	2	3	2	4	3	4	2	2	2	3	3	#NULL!	4	1	3	3	3	3	3	3	2	3	3	3	3	4	2.83333	2.57143	2.75
642	1	4	2	2	7/14/2012 1:22:21 PM	1	1	1	1	1	4	4	1	5	4	3	3	3	3	3	3	3	3	3	3	3	3	4	3	4	3	#NULL!	4	3	3	3	4	3	2	4	2	2	2	3	4	3	3.16667	3.14286	3.5
643	1	4	2	2	7/14/2012 1:45:08 PM	1	1	1	3	2	2	2	2	3	3	3	3	3	3	3	4	4	3	2	2	5	1	3	2	3	3	#NULL!	4	2	4	3	2	3	3	4	3	2	2	3	2	3	3.16667	2.42857	3
644	1	4	2	2	7/16/2012 3:18:32 PM	1	1	1	1	1	3	3	1	4	4	3	3	3	4	4	3	3	3	3	3	4	2	3	2	4	3	#NULL!	4	2	5	4	4	4	3	4	2	3	3	3	3	3	3.5	2.71429	3.25
645	1	4	2	2	7/17/2012 2:07:00 PM	1	1	1	3	2	3	3	2	5	4	2	4	4	3	4	2	3	4	4	2	2	4	4	2	4	3	#NULL!	4	3	4	3	3	2	3	4	4	4	2	4	3	4	3.5	3.28571	3.5
646	1	4	2	2	7/18/2012 10:10:12 AM	1	1	1	1	1	4	4	1	5	4	2	4	2	3	3	2	4	3	2	1	4	2	2	1	2	1	#NULL!	3	3	2	2	2	2	2	4	1	1	5	3	2	4	3	2.14286	2.25
647	1	4	2	2	7/19/2012 5:21:19 PM	1	1	1	1	1	2	2	2	3	4	2	4	3	5	3	4	4	4	3	3	3	3	3	3	4	3	#NULL!	3	4	3	2	3	2	3	3	3	3	3	3	4	3	3.83333	3.28571	3.5
648	1	4	2	2	7/19/2012 5:38:58 PM	1	1	1	1	1	3	3	2	4	4	2	4	3	4	4	4	4	3	3	4	2	4	3	3	4	3	#NULL!	4	4	3	3	3	3	3	4	2	3	3	3	4	3	3.83333	3.42857	3.75
649	1	4	2	2	7/23/2012 1:16:37 PM	1	1	1	4	#NULL!	4	4	2	3	4	3	3	3	4	3	2	4	3	4	4	2	4	3	3	4	3	#NULL!	4	3	3	3	3	3	3	3	3	3	4	3	3	4	3.16667	3.57143	3.5
650	1	4	2	2	7/24/2012 9:19:23 AM	1	1	1	4	#NULL!	3	4	1	2	#NULL!	3	3	4	3	4	2	3	3	4	2	3	3	3	3	3	3	#NULL!	3	3	4	3	2	3	3	4	2	2	2	3	3	3	3.2	3	3
651	1	4	2	2	7/24/2012 10:33:41 AM	1	1	1	#NULL!	#NULL!	#NULL!	#NULL!	#NULL!	#NULL!	3	4	2	2	3	3	3	4	4	1	2	3	3	3	3	#NULL!	#NULL!	#NULL!	#NULL!	2	2	#NULL!	#NULL!	#NULL!	#NULL!	#NULL!	#NULL!	#NULL!	3	#NULL!	#NULL!	#NULL!	2.66667	2.85714	2
652	1	4	2	2	7/24/2012 10:47:39 AM	1	1	1	4	#NULL!	4	4	1	5	4	2	4	4	4	4	4	4	4	4	4	2	4	4	4	4	4	#NULL!	4	4	2	2	2	2	2	4	2	4	2	4	4	4	4	4	4
653	1	4	2	2	7/24/2012 11:06:25 AM	1	1	1	#NULL!	#NULL!	#NULL!	#NULL!	#NULL!	#NULL!	3	3	3	3	#NULL!	3	#NULL!	3	#NULL!	4	3	4	2	3	3	4	#NULL!	#NULL!	4	2	2	3	3	3	#NULL!	#NULL!	#NULL!	#NULL!	3	#NULL!	#NULL!	#NULL!	3	3	3.33333
654	1	4	2	2	7/24/2012 11:08:33 AM	1	1	1	3	2	4	3	2	4	4	2	4	2	3	3	3	2	2	2	2	4	2	2	3	5	3	#NULL!	5	3	5	3	3	3	3	5	1	1	3	2	4	4	3.16667	2.14286	4
655	1	4	2	2	7/25/2012 12:12:31 PM	1	1	1	1	1	2	2	1	4	4	4	2	3	3	3	3	3	3	3	3	3	3	3	3	4	3	#NULL!	4	3	3	3	3	3	2	3	3	3	3	3	3	3	3	3	3.5
656	1	4	2	2	7/25/2012 2:53:35 PM	1	1	1	#NULL!	#NULL!	4	4	2	5	3	3	3	1	1	2	3	3	3	3	1	4	2	2	2	3	3	#NULL!	4	1	2	2	3	3	1	3	3	2	3	2	3	3	2.16667	2.28571	2.75
657	1	4	2	2	7/26/2012 1:24:11 PM	1	1	1	1	1	2	2	1	3	4	3	3	3	4	3	3	4	3	4	2	4	2	4	3	5	3	#NULL!	5	3	1	2	2	2	3	4	2	3	4	4	2	4	3.33333	3.14286	4
658	1	4	2	2	7/27/2012 11:57:32 AM	1	1	1	4	#NULL!	4	4	2	3	4	2	4	4	4	4	3	4	4	4	3	2	4	4	4	4	2	#NULL!	4	3	4	3	2	3	3	5	2	4	3	3	4	4	3.83333	3.85714	3.25
659	1	4	2	2	7/27/2012 7:03:55 PM	1	1	1	#NULL!	#NULL!	#NULL!	#NULL!	#NULL!	#NULL!	4	4	2	3	4	4	3	3	4	3	2	3	3	4	3	#NULL!	#NULL!	#NULL!	#NULL!	4	#NULL!	#NULL!	#NULL!	#NULL!	#NULL!	#NULL!	#NULL!	#NULL!	3	#NULL!	#NULL!	#NULL!	3.33333	3.14286	4
660	1	4	2	2	7/29/2012 9:12:15 PM	1	1	1	1	1	3	3	1	4	4	2	4	3	4	4	3	4	3	#NULL!	4	2	4	3	3	5	4	#NULL!	5	5	1	3	1	3	3	4	3	4	4	3	5	3	3.66667	3.5	4.75
661	1	4	2	2	7/30/2012 6:45:18 AM	1	1	1	1	1	4	4	1	5	4	3	3	3	3	3	3	3	3	3	3	3	3	3	3	4	3	#NULL!	3	3	4	3	3	3	3	3	3	3	3	3	3	3	3.16667	3	3.25
662	1	4	2	2	7/31/2012 11:13:19 AM	1	1	1	4	#NULL!	2	3	2	2	3	2	4	3	4	4	3	4	3	3	3	2	4	3	4	4	3	#NULL!	4	3	4	3	4	3	2	4	3	2	3	4	3	4	3.5	3.42857	3.5
663	2	5	2	5	7/31/2012 1:11:41 PM	1	1	1	#NULL!	#NULL!	#NULL!	#NULL!	#NULL!	#NULL!	#NULL!	#NULL!	#NULL!	#NULL!	#NULL!	#NULL!	#NULL!	#NULL!	#NULL!	#NULL!	#NULL!	#NULL!	#NULL!	#NULL!	#NULL!	#NULL!	#NULL!	#NULL!	#NULL!	#NULL!	#NULL!	#NULL!	#NULL!	#NULL!	#NULL!	#NULL!	#NULL!	#NULL!	#NULL!	#NULL!	#NULL!	#NULL!	#NULL!	#NULL!	#NULL!
664	1	4	2	2	7/31/2012 3:42:34 PM	1	1	1	4	#NULL!	2	2	2	3	3	3	3	3	4	3	2	4	3	3	3	3	3	3	3	4	3	#NULL!	3	3	2	3	3	3	3	3	3	3	3	3	3	3	3	3.14286	3.25
665	1	4	2	2	7/31/2012 3:51:43 PM	1	1	1	#NULL!	#NULL!	2	4	2	5	#NULL!	2	4	3	#NULL!	4	#NULL!	4	#NULL!	#NULL!	3	2	4	4	4	4	#NULL!	#NULL!	4	3	4	3	3	3	#NULL!	#NULL!	2	3	3	3	#NULL!	3	3.66667	3.8	3.66667
666	1	4	2	2	40947.367511574077	1	1	1	3	2	2	2	2	2	3	3	3	3	4	3	3	3	3	3	4	2	4	3	3	4	3	#NULL!	4	3	3	3	3	3	3	3	3	3	3	3	3	3	3.16667	3.28571	3.5
667	1	4	2	2	40976.624467592592	1	1	1	3	2	2	2	2	2	2	3	3	2	3	3	2	4	3	4	4	3	3	3	2	3	4	#NULL!	3	2	4	3	4	2	2	4	3	4	3	4	3	4	2.5	3.28571	3
668	1	4	2	2	40976.630289351851	1	1	1	4	#NULL!	3	3	1	4	4	3	3	3	3	3	3	3	3	4	3	3	3	3	3	4	3	#NULL!	4	3	2	2	1	1	4	4	3	4	4	3	4	4	3.16667	3.14286	3.5
669	1	4	2	2	41068.368148148147	1	1	1	#NULL!	#NULL!	4	4	2	3	3	4	2	2	4	3	2	3	3	4	2	4	2	2	2	4	4	#NULL!	4	2	3	3	2	3	3	4	2	3	3	2	3	2	2.66667	2.57143	3.5
670	1	4	2	2	41068.514687499999	1	1	1	#NULL!	#NULL!	#NULL!	#NULL!	#NULL!	#NULL!	2	3	3	3	3	4	3	4	3	3	3	3	3	3	3	2	3	#NULL!	3	4	2	3	3	2	3	4	#NULL!	#NULL!	4	#NULL!	2	#NULL!	3	3.14286	3
671	1	4	2	2	41068.536273148151	1	1	1	#NULL!	#NULL!	2	3	2	4	4	2	4	4	4	4	4	4	4	4	3	3	3	4	4	3	4	#NULL!	4	4	2	2	3	2	3	4	3	3	4	4	3	4	4	3.71429	3.75
672	1	4	2	2	41068.547430555554	1	1	1	#NULL!	#NULL!	4	4	2	4	3	4	2	2	4	3	3	4	3	2	2	2	4	3	2	4	3	#NULL!	4	3	3	3	3	3	2	3	4	2	2	3	4	3	2.83333	2.85714	3.5
673	1	4	2	2	41068.551539351851	1	1	1	#NULL!	#NULL!	3	3	2	2	3	3	3	1	1	2	3	3	2	1	1	3	3	1	2	5	3	#NULL!	4	1	1	1	3	1	1	4	1	1	5	2	5	2	2.16667	1.85714	3.25
674	1	4	2	2	41098.34815972222	1	1	1	#NULL!	#NULL!	4	4	2	5	4	4	2	3	3	4	3	3	3	4	3	3	3	3	3	4	3	#NULL!	4	3	3	3	3	3	3	3	3	3	3	3	3	3	3.16667	3.14286	3.5
675	1	4	2	2	41098.628645833334	1	1	1	#NULL!	#NULL!	2	3	2	3	3	3	3	3	3	3	3	4	3	3	3	3	3	3	3	4	3	#NULL!	4	3	2	3	3	3	3	3	3	3	3	3	3	3	3	3.14286	3.5
676	1	4	2	2	41129.700856481482	1	1	1	1	1	4	4	1	5	4	2	4	4	3	4	4	4	4	4	4	2	4	2	4	5	4	#NULL!	4	3	2	3	2	3	4	4	#NULL!	4	4	4	4	4	3.83333	3.71429	4
677	1	4	2	2	41251.854050925926	1	1	1	1	1	4	4	1	4	4	2	4	3	4	3	4	4	4	3	3	2	4	3	3	5	3	#NULL!	4	4	1	1	1	1	3	4	3	3	4	4	4	3	3.66667	3.42857	4
678	1	4	2	2	8/13/2012 9:58:19 AM	1	1	1	1	1	2	2	2	4	4	3	3	3	4	3	3	3	3	2	3	2	4	4	3	3	3	#NULL!	3	3	3	3	3	2	2	4	3	3	3	3	3	3	3.33333	3.14286	3
679	1	4	2	2	8/13/2012 12:19:26 PM	1	1	1	#NULL!	#NULL!	#NULL!	#NULL!	#NULL!	#NULL!	#NULL!	#NULL!	#NULL!	#NULL!	#NULL!	#NULL!	#NULL!	#NULL!	#NULL!	#NULL!	#NULL!	#NULL!	#NULL!	#NULL!	#NULL!	#NULL!	#NULL!	#NULL!	#NULL!	#NULL!	#NULL!	#NULL!	#NULL!	#NULL!	#NULL!	#NULL!	#NULL!	#NULL!	#NULL!	#NULL!	#NULL!	#NULL!	#NULL!	#NULL!	#NULL!
680	2	5	2	5	8/13/2012 3:43:09 PM	1	1	1	1	1	2	2	2	3	4	3	3	3	3	4	#NULL!	3	#NULL!	#NULL!	3	3	3	1	1	3	#NULL!	#NULL!	3	3	4	4	3	5	#NULL!	#NULL!	#NULL!	#NULL!	4	#NULL!	#NULL!	#NULL!	3.4	2.2	3
681	2	5	2	5	8/14/2012 3:03:37 PM	1	1	1	#NULL!	#NULL!	3	1	1	5	4	3	3	3	4	3	3	3	3	4	2	4	2	3	3	4	3	#NULL!	4	3	3	4	3	4	3	4	3	#NULL!	4	3	3	4	3.33333	2.85714	3.5
693	2	5	2	5	8/15/2012 12:04:24 PM	1	1	1	1	1	4	4	1	5	5	3	3	4	4	4	4	4	4	3	3	2	4	4	4	4	4	#NULL!	4	3	2	3	3	3	3	3	4	3	3	3	4	3	4	3.71429	3.75
694	1	4	2	2	8/15/2012 12:21:57 PM	1	1	1	#NULL!	#NULL!	1	3	2	2	4	2	4	4	4	4	4	5	4	3	4	2	4	4	4	4	3	#NULL!	4	4	2	3	3	2	3	4	4	4	3	4	4	3	4	4	3.75
704	2	5	2	5	8/16/2012 12:07:37 PM	1	1	1	#NULL!	#NULL!	#NULL!	#NULL!	#NULL!	#NULL!	5	2	4	4	4	4	4	4	4	3	4	2	4	4	4	#NULL!	#NULL!	#NULL!	#NULL!	5	#NULL!	#NULL!	#NULL!	#NULL!	#NULL!	#NULL!	#NULL!	#NULL!	4	#NULL!	#NULL!	#NULL!	4.16667	3.85714	5
705	2	5	2	5	8/16/2012 12:50:06 PM	1	1	1	#NULL!	#NULL!	2	2	2	4	4	2	4	4	4	4	3	4	#NULL!	4	4	2	4	4	4	4	4	#NULL!	4	4	3	2	4	2	4	4	2	4	4	3	4	4	3.83333	4	4
706	2	5	2	5	8/16/2012 1:00:49 PM	1	1	1	#NULL!	#NULL!	#NULL!	#NULL!	#NULL!	#NULL!	5	2	4	#NULL!	3	#NULL!	3	#NULL!	#NULL!	3	#NULL!	2	4	4	4	#NULL!	#NULL!	#NULL!	#NULL!	4	#NULL!	#NULL!	#NULL!	#NULL!	#NULL!	#NULL!	#NULL!	#NULL!	#NULL!	#NULL!	#NULL!	#NULL!	3.75	3.75	4
708	2	5	2	5	8/16/2012 4:54:40 PM	1	1	1	#NULL!	#NULL!	4	4	2	4	4	4	2	4	4	4	3	4	4	3	4	3	3	3	4	4	3	#NULL!	5	4	4	2	2	4	2	4	3	3	3	3	4	4	3.5	3.57143	4
709	2	5	2	5	8/16/2012 8:50:21 PM	1	1	1	#NULL!	#NULL!	#NULL!	#NULL!	#NULL!	#NULL!	#NULL!	#NULL!	#NULL!	#NULL!	#NULL!	#NULL!	#NULL!	#NULL!	#NULL!	#NULL!	#NULL!	2	4	#NULL!	#NULL!	#NULL!	#NULL!	#NULL!	#NULL!	#NULL!	#NULL!	#NULL!	#NULL!	#NULL!	#NULL!	#NULL!	#NULL!	#NULL!	#NULL!	#NULL!	#NULL!	#NULL!	#NULL!	4	#NULL!
710	2	5	2	5	8/16/2012 10:06:38 PM	1	1	1	#NULL!	#NULL!	2	4	2	3	4	2	4	4	5	4	3	4	4	4	4	2	4	4	3	4	3	#NULL!	5	4	2	2	3	3	3	4	3	4	3	4	3	4	4	3.85714	4
711	2	5	2	5	8/17/2012 2:35:37 AM	1	1	1	#NULL!	#NULL!	4	4	2	5	4	4	2	4	4	4	2	3	#NULL!	4	4	2	4	4	4	4	3	#NULL!	4	4	2	2	2	4	2	4	4	4	3	4	4	2	3.33333	3.83333	3.75
712	2	5	2	5	8/17/2012 11:12:51 AM	1	1	1	#NULL!	#NULL!	#NULL!	#NULL!	#NULL!	#NULL!	5	2	4	#NULL!	4	#NULL!	#NULL!	#NULL!	#NULL!	#NULL!	#NULL!	2	4	3	4	#NULL!	#NULL!	#NULL!	#NULL!	4	#NULL!	#NULL!	#NULL!	#NULL!	#NULL!	#NULL!	#NULL!	#NULL!	#NULL!	#NULL!	#NULL!	#NULL!	4.33333	3.66667	4
714	2	5	2	5	8/17/2012 12:59:02 PM	1	1	1	1	1	4	4	1	4	4	1	5	5	5	4	4	4	4	4	4	1	5	5	5	5	3	#NULL!	4	5	3	3	2	3	3	4	3	4	4	4	4	4	4.5	4.42857	4.25
715	2	5	2	5	8/17/2012 8:17:08 PM	1	1	1	#NULL!	#NULL!	4	4	2	5	4	2	4	4	4	4	4	4	4	4	4	2	4	4	4	4	3	#NULL!	4	4	2	2	4	2	3	4	2	4	4	4	3	4	4	4	3.75
716	2	5	2	5	8/18/2012 2:50:42 AM	1	1	1	#NULL!	#NULL!	4	4	1	5	4	3	3	3	4	4	4	4	3	1	#NULL!	3	3	2	4	4	3	#NULL!	4	4	3	2	4	3	3	3	3	3	3	3	3	3	3.66667	2.83333	3.75
717	2	5	2	5	8/18/2012 12:24:06 PM	1	1	1	#NULL!	#NULL!	2	2	1	2	5	1	5	4	5	5	5	4	4	5	4	2	4	5	4	5	4	#NULL!	5	5	2	3	3	1	5	4	3	4	4	5	4	4	4.83333	4.28571	4.75
718	2	5	2	5	8/18/2012 12:44:02 PM	1	1	1	#NULL!	#NULL!	4	4	2	5	4	3	3	3	3	4	3	4	3	3	3	3	3	3	3	3	3	#NULL!	3	3	4	3	3	3	3	3	3	3	3	3	3	3	3.33333	3.14286	3
719	2	5	2	5	8/18/2012 1:09:49 PM	1	1	1	#NULL!	#NULL!	3	4	2	3	4	3	3	3	4	3	3	3	3	4	3	4	2	3	2	4	3	#NULL!	4	3	3	2	4	4	2	4	3	3	3	3	3	4	3.33333	2.85714	3.5
720	2	5	2	5	8/18/2012 1:14:50 PM	1	1	1	2	1	1	1	1	2	4	2	4	4	4	5	4	4	3	3	3	2	4	5	4	3	4	#NULL!	4	4	2	2	4	4	2	4	2	4	5	4	4	4	4.16667	3.71429	3.75
721	2	5	2	5	8/18/2012 3:57:15 PM	1	1	1	2	1	1	1	2	2	4	2	4	4	4	4	4	4	#NULL!	3	2	3	3	3	3	5	3	#NULL!	4	4	3	3	3	3	3	4	3	3	4	4	4	4	4	3	4
722	2	5	2	5	8/18/2012 6:28:51 PM	1	1	1	#NULL!	#NULL!	4	4	2	4	3	3	3	3	3	3	2	3	3	3	4	3	3	3	3	5	2	#NULL!	5	4	3	3	3	2	3	3	3	3	3	3	2	3	2.83333	3.14286	4
723	2	5	2	5	8/18/2012 6:43:13 PM	1	1	1	#NULL!	#NULL!	3	2	2	4	5	2	4	3	4	4	3	4	#NULL!	1	3	2	4	2	3	5	3	#NULL!	4	4	4	4	3	4	2	4	4	4	4	3	3	4	3.83333	2.83333	4
724	2	5	2	5	8/18/2012 7:34:11 PM	1	1	1	#NULL!	#NULL!	3	4	1	4	4	4	2	3	3	4	4	4	3	3	3	3	3	3	3	4	4	#NULL!	3	4	3	3	3	2	3	4	3	4	4	3	3	3	3.33333	3.14286	3.75
725	2	5	2	5	8/19/2012 9:28:11 AM	1	1	1	#NULL!	#NULL!	#NULL!	#NULL!	#NULL!	#NULL!	3	4	2	3	4	3	3	3	3	2	3	3	3	3	4	3	#NULL!	#NULL!	4	4	3	3	3	3	#NULL!	#NULL!	#NULL!	#NULL!	4	#NULL!	3	#NULL!	3	3	3.66667
726	2	5	2	5	8/19/2012 1:53:28 PM	1	1	1	#NULL!	#NULL!	4	4	2	5	4	#NULL!	#NULL!	4	4	4	4	4	#NULL!	#NULL!	3	2	4	3	3	4	4	#NULL!	4	4	3	3	2	2	3	4	#NULL!	4	3	#NULL!	3	4	4	3.4	4
727	2	5	2	5	8/19/2012 2:35:20 PM	1	1	1	#NULL!	#NULL!	2	4	2	4	4	2	4	3	4	4	4	4	3	4	3	2	4	3	3	4	#NULL!	#NULL!	3	4	4	2	3	1	2	4	#NULL!	4	3	2	#NULL!	3	3.83333	3.42857	3.66667
728	2	5	2	5	8/20/2012 2:29:22 AM	1	1	1	#NULL!	#NULL!	2	3	2	4	4	3	3	4	4	4	3	4	3	#NULL!	4	2	4	4	4	4	2	#NULL!	4	5	2	2	2	2	3	3	3	3	3	3	3	3	3.66667	3.83333	3.75
729	2	5	2	5	8/20/2012 2:34:04 AM	1	1	1	#NULL!	#NULL!	4	4	2	4	4	2	4	4	4	4	4	4	3	3	3	3	3	4	3	4	3	#NULL!	4	4	2	2	2	2	2	4	3	3	3	3	3	3	4	3.28571	3.75
733	1	4	2	2	8/20/2012 3:24:33 PM	1	1	1	4	#NULL!	1	2	1	2	3	2	4	3	4	4	3	4	4	2	4	2	4	4	3	4	3	#NULL!	4	3	2	2	2	2	3	4	3	4	4	4	3	4	3.5	3.57143	3.5
734	1	4	2	2	8/20/2012 3:55:50 PM	1	1	1	#NULL!	#NULL!	4	4	1	5	3	3	3	3	4	4	3	4	4	4	4	3	3	4	3	4	3	#NULL!	4	4	3	3	3	3	4	4	2	4	4	3	3	4	3.33333	3.71429	3.75
736	1	4	2	2	8/20/2012 4:31:14 PM	1	1	1	1	1	1	1	1	3	3	2	4	2	3	3	4	3	3	3	3	2	4	3	3	4	3	#NULL!	4	3	3	3	3	3	2	3	2	2	2	3	3	3	3.16667	3.14286	3.5
737	2	5	2	5	8/20/2012 7:20:26 PM	1	1	1	#NULL!	#NULL!	4	4	2	3	4	3	3	3	3	3	3	3	3	3	3	3	3	3	3	4	3	#NULL!	4	3	3	3	3	4	3	2	2	2	2	2	2	4	3.16667	3	3.5
738	2	5	2	5	8/21/2012 2:30:06 AM	1	1	1	#NULL!	#NULL!	4	4	2	5	4	2	4	3	4	4	3	3	3	3	3	3	3	4	3	4	3	#NULL!	4	4	3	3	3	3	3	3	3	3	4	3	3	3	3.66667	3.14286	3.75
739	2	5	2	5	8/21/2012 9:23:04 AM	1	1	1	#NULL!	#NULL!	3	3	1	2	4	4	2	3	5	4	2	4	3	3	3	3	3	3	4	5	3	#NULL!	5	5	1	3	1	3	3	4	2	3	4	4	5	3	3.33333	3.28571	4.5
740	2	5	2	5	8/21/2012 10:47:53 AM	1	1	1	#NULL!	#NULL!	4	4	2	5	4	3	3	3	4	3	#NULL!	3	3	3	3	3	3	3	3	4	3	#NULL!	5	#NULL!	3	4	3	4	3	4	3	3	3	3	3	3	3.4	3	4
741	2	5	2	5	8/21/2012 11:56:08 AM	1	1	1	#NULL!	#NULL!	2	3	2	3	4	3	3	4	3	4	3	4	3	3	3	3	3	3	3	4	3	#NULL!	4	4	3	3	3	2	3	4	3	3	3	3	3	3	3.5	3.14286	3.75
743	2	5	2	5	8/21/2012 9:05:51 PM	1	1	1	#NULL!	#NULL!	4	4	2	5	4	3	3	3	4	4	3	3	3	3	3	3	3	3	3	3	3	#NULL!	3	4	3	3	3	3	2	4	3	3	2	3	2	3	3.5	3	3.25
744	2	5	2	5	8/22/2012 8:53:23 AM	1	1	1	#NULL!	#NULL!	2	3	2	2	4	3	3	3	4	4	3	4	#NULL!	2	#NULL!	3	3	3	3	4	3	#NULL!	4	4	3	3	3	2	3	3	3	3	#NULL!	3	3	2	3.5	3	3.75
747	2	5	2	5	8/23/2012 3:03:38 AM	1	1	1	#NULL!	#NULL!	3	3	2	3	4	2	4	4	4	4	3	4	4	4	4	#NULL!	#NULL!	4	4	5	3	#NULL!	4	4	3	3	4	3	3	4	3	3	3	3	3	3	3.83333	4	4
748	2	5	2	5	8/23/2012 10:54:33 AM	1	1	1	#NULL!	#NULL!	2	2	2	2	4	2	4	4	5	4	#NULL!	4	#NULL!	#NULL!	4	2	4	3	4	5	4	#NULL!	4	4	3	2	3	2	3	3	#NULL!	3	4	4	4	4	4.2	3.8	4.25
750	2	5	2	5	8/23/2012 3:55:48 PM	1	1	1	#NULL!	#NULL!	3	3	2	3	4	3	3	3	4	5	2	3	4	4	4	3	3	3	3	4	3	#NULL!	4	4	4	3	3	2	3	5	3	4	4	4	1	4	3.5	3.42857	3.75
751	2	5	2	5	8/23/2012 4:58:27 PM	1	1	1	#NULL!	#NULL!	4	4	2	4	4	3	3	4	5	5	3	4	3	5	4	2	4	4	4	5	3	#NULL!	5	4	2	3	3	3	1	4	2	4	3	4	3	4	4	4	4.25
752	2	5	2	5	8/23/2012 5:11:00 PM	1	1	1	#NULL!	#NULL!	3	3	2	4	4	2	4	3	4	4	3	4	3	4	3	2	4	3	4	4	3	#NULL!	4	4	4	3	2	3	3	4	3	3	3	4	3	4	3.66667	3.57143	3.75
753	2	5	2	5	8/24/2012 1:17:34 AM	1	1	1	#NULL!	#NULL!	4	4	2	4	4	3	3	3	3	3	3	3	4	3	3	3	3	3	3	4	3	#NULL!	4	4	3	3	4	3	3	4	3	3	3	3	3	3	3.16667	3.14286	3.75
754	2	5	2	5	8/24/2012 8:21:19 AM	1	1	1	#NULL!	#NULL!	1	4	2	3	4	2	4	4	5	4	4	4	3	4	4	2	4	4	4	5	3	#NULL!	5	4	3	3	3	3	3	4	3	4	4	4	3	4	4.16667	3.85714	4.25
755	2	5	2	5	8/24/2012 8:38:03 AM	1	1	1	2	1	2	2	2	3	4	2	4	3	4	4	2	4	3	3	3	3	3	4	3	5	3	#NULL!	5	3	3	4	2	3	3	4	3	1	4	3	3	5	3.5	3.28571	4
757	1	4	2	2	8/27/2012 8:24:07 AM	1	1	1	#NULL!	#NULL!	#NULL!	#NULL!	#NULL!	#NULL!	5	2	4	4	5	5	4	4	3	3	4	2	4	4	4	5	#NULL!	#NULL!	4	4	2	3	2	2	#NULL!	#NULL!	#NULL!	#NULL!	4	#NULL!	3	#NULL!	4.5	3.71429	4.33333
758	2	5	2	5	8/27/2012 5:33:38 PM	1	1	1	1	1	4	4	1	5	4	1	5	4	5	5	3	4	4	4	4	2	4	4	4	5	3	#NULL!	4	3	3	3	2	2	3	4	3	5	4	4	3	4	4.33333	4	3.75
759	2	5	2	5	8/27/2012 7:47:19 PM	1	1	1	1	1	4	4	1	5	3	3	3	3	3	3	3	4	3	2	3	3	3	3	3	3	3	#NULL!	3	4	3	3	3	3	3	3	3	3	3	3	3	4	3	3	3.25
761	2	5	2	5	8/28/2012 10:23:59 AM	1	1	1	2	1	1	1	2	2	4	2	4	3	4	4	4	4	#NULL!	4	4	3	3	4	3	5	2	#NULL!	4	5	2	2	2	2	2	4	1	4	4	4	4	4	3.83333	3.66667	4
769	2	5	2	5	8/29/2012 4:26:58 AM	1	1	1	#NULL!	#NULL!	2	4	2	2	4	3	3	3	3	3	2	3	3	4	4	3	3	2	2	5	3	#NULL!	5	3	3	3	3	2	3	3	3	3	4	3	3	2	3	3	4
775	2	5	2	5	8/29/2012 7:13:57 PM	1	1	1	#NULL!	#NULL!	1	3	2	2	4	2	4	3	5	4	3	4	3	2	4	3	3	3	3	5	4	#NULL!	5	4	3	3	4	4	2	2	3	3	3	4	3	3	3.83333	3.14286	4.5
776	2	5	2	5	8/29/2012 8:56:55 PM	1	1	1	#NULL!	#NULL!	4	4	2	4	4	3	3	4	4	4	4	4	4	4	3	3	3	4	4	4	3	#NULL!	3	3	3	3	3	2	4	4	3	3	4	4	3	4	3.83333	3.71429	3.25
777	1	4	2	2	8/29/2012 11:44:45 PM	1	1	1	#NULL!	#NULL!	#NULL!	#NULL!	#NULL!	#NULL!	#NULL!	#NULL!	#NULL!	#NULL!	#NULL!	#NULL!	#NULL!	#NULL!	#NULL!	#NULL!	#NULL!	#NULL!	#NULL!	#NULL!	#NULL!	#NULL!	#NULL!	#NULL!	#NULL!	#NULL!	#NULL!	#NULL!	#NULL!	#NULL!	#NULL!	#NULL!	#NULL!	#NULL!	#NULL!	#NULL!	#NULL!	#NULL!	#NULL!	#NULL!	#NULL!
778	2	5	2	5	8/30/2012 12:51:58 AM	1	1	1	#NULL!	#NULL!	2	3	2	2	5	2	4	3	4	4	3	4	4	4	3	3	3	4	3	5	3	#NULL!	5	4	4	3	3	4	3	4	3	4	4	4	4	3	3.83333	3.57143	4.25
779	1	4	2	2	8/30/2012 8:55:10 AM	1	1	1	1	1	4	4	1	5	4	2	4	4	4	5	4	4	4	4	4	2	4	4	3	4	4	#NULL!	4	4	5	3	3	4	4	4	3	3	4	4	4	4	4.16667	3.85714	4
782	2	5	2	5	8/31/2012 12:58:09 AM	1	1	1	#NULL!	#NULL!	3	3	2	4	5	2	4	4	4	4	4	4	3	4	3	2	4	4	3	4	3	#NULL!	4	4	4	2	4	2	3	3	3	4	4	3	4	3	4.16667	3.57143	3.75
783	2	5	2	5	8/31/2012 12:58:24 AM	1	1	1	#NULL!	#NULL!	2	3	2	2	3	2	4	4	4	4	4	3	3	4	4	4	2	3	2	4	1	#NULL!	4	4	2	2	2	2	2	4	2	4	3	2	3	4	3.83333	3	3.25
784	2	5	2	5	8/31/2012 10:39:22 AM	1	1	1	1	1	2	2	1	3	4	2	4	3	3	3	3	4	3	3	3	3	3	3	3	4	3	#NULL!	4	3	3	3	4	3	3	4	3	4	3	3	4	3	3.33333	3.14286	3.5
785	1	4	2	2	8/31/2012 11:26:35 AM	1	1	1	#NULL!	#NULL!	2	3	2	2	3	2	4	4	4	5	3	4	4	4	3	2	4	3	3	4	3	#NULL!	5	3	4	3	4	3	2	4	3	2	3	3	4	3	3.83333	3.57143	3.75
786	2	5	2	5	8/31/2012 1:32:29 PM	1	1	1	2	1	2	2	2	4	4	2	4	4	3	5	4	4	3	4	3	3	3	3	3	5	4	#NULL!	4	3	3	2	3	3	3	4	3	3	3	4	3	4	4	3.28571	4
788	2	5	2	5	8/31/2012 6:58:48 PM	1	1	1	#NULL!	#NULL!	4	4	2	4	3	3	3	3	3	4	3	4	4	3	3	3	3	3	3	4	3	#NULL!	4	3	4	3	3	3	3	3	3	3	1	3	3	3	3.16667	3.28571	3.5
793	2	5	2	5	40977.929930555554	1	1	1	#NULL!	#NULL!	4	4	2	4	4	2	4	3	4	4	3	4	#NULL!	2	3	2	4	3	3	3	3	#NULL!	3	4	4	3	3	3	2	#NULL!	3	3	3	3	3	3	3.66667	3.16667	3.25
795	2	5	2	5	41008.648622685185	1	1	1	#NULL!	#NULL!	4	4	2	5	4	2	4	3	3	4	3	3	3	4	3	3	3	3	3	4	2	#NULL!	4	4	4	2	3	3	3	4	3	3	2	3	2	4	3.5	3.14286	3.5
796	2	5	2	5	41038.458379629628	1	1	1	#NULL!	#NULL!	3	4	2	5	3	3	3	3	4	3	3	3	2	4	3	3	3	3	3	3	2	#NULL!	4	4	4	2	4	4	3	4	3	2	3	3	2	3	3.16667	3	3.25
797	2	5	2	5	41038.465798611112	1	1	1	1	1	3	3	1	4	5	2	4	4	4	5	5	4	4	4	4	2	4	3	3	4	4	#NULL!	5	4	2	2	1	2	3	4	3	3	4	4	4	4	4.5	3.71429	4.25
798	2	5	2	5	41038.692557870374	1	1	1	#NULL!	#NULL!	4	4	2	4	4	3	3	3	3	4	3	3	4	4	3	3	3	3	4	5	3	#NULL!	4	4	3	2	3	3	3	3	3	3	3	3	3	3	3.33333	3.42857	4
799	2	5	2	5	41069.427233796298	1	1	1	3	2	2	4	2	4	4	3	3	3	3	4	3	3	3	4	3	2	4	3	3	4	3	#NULL!	4	3	3	2	3	2	3	3	2	3	3	3	3	2	3.33333	3.28571	3.5
800	2	5	2	5	41069.672939814816	1	1	1	2	1	1	1	2	2	4	2	4	4	4	4	4	4	4	3	4	2	4	4	4	5	4	#NULL!	4	4	3	3	4	3	3	4	3	4	4	4	3	4	4	3.85714	4.25
801	2	5	2	5	41099.39203703704	1	1	1	#NULL!	#NULL!	#NULL!	#NULL!	#NULL!	#NULL!	4	2	4	4	4	4	4	4	4	3	4	3	3	4	4	5	#NULL!	#NULL!	#NULL!	4	2	#NULL!	2	2	#NULL!	#NULL!	#NULL!	#NULL!	4	#NULL!	#NULL!	#NULL!	4	3.71429	4.5
803	2	5	2	5	41130.728738425925	1	1	1	1	1	2	2	1	4	4	2	4	4	4	4	4	4	4	3	3	2	4	3	3	5	4	#NULL!	5	3	3	4	2	4	5	4	4	5	4	3	4	4	4	3.42857	4.25
804	2	5	2	5	41161.611284722225	1	1	1	4	#NULL!	4	4	1	4	4	3	3	3	3	3	4	3	3	3	2	3	3	3	4	4	3	#NULL!	3	4	2	3	3	4	3	4	3	3	3	3	3	4	3.33333	3	3.5
806	2	5	2	5	41191.645208333335	1	1	1	1	1	2	2	1	3	5	2	4	3	4	4	3	3	3	3	4	2	4	4	3	4	3	#NULL!	5	3	3	2	3	3	4	4	3	3	4	3	3	4	3.83333	3.42857	3.75
807	2	5	2	5	41222.359548611108	1	1	1	4	#NULL!	4	4	1	5	4	3	3	3	3	4	3	4	4	4	3	5	1	4	3	4	3	#NULL!	5	3	4	4	4	4	3	3	3	4	4	3	3	4	3.33333	3.28571	3.75
808	2	5	2	5	41222.548576388886	1	1	1	4	#NULL!	4	4	2	3	4	3	3	3	3	3	4	3	3	4	2	4	2	3	2	4	3	#NULL!	3	4	3	3	2	3	2	4	3	3	3	3	2	4	3.33333	2.71429	3.5
809	2	5	2	5	41252.650104166663	1	1	1	2	1	2	2	2	3	4	3	3	3	4	4	3	3	3	2	4	3	3	2	3	4	3	#NULL!	4	3	3	2	3	3	3	4	3	3	4	3	3	4	3.5	2.85714	3.5
810	2	5	2	5	9/16/2012 2:15:07 PM	1	1	1	1	1	2	2	1	3	3	4	2	3	3	3	3	1	4	3	3	3	3	4	3	5	4	#NULL!	#NULL!	4	3	#NULL!	2	1	4	5	3	2	4	3	3	4	2.83333	3	4.33333
811	2	5	2	5	9/18/2012 12:23:40 PM	1	1	1	4	#NULL!	4	4	1	5	4	3	3	4	4	4	5	4	3	4	2	3	3	3	4	4	3	#NULL!	4	5	2	3	3	3	2	4	2	3	3	4	3	4	4	3.28571	4
812	2	5	2	5	9/19/2012 3:35:25 PM	1	1	1	#NULL!	#NULL!	3	3	2	3	4	3	3	3	4	4	4	4	4	4	4	2	4	3	3	4	4	#NULL!	4	4	3	3	3	3	4	3	3	4	4	4	4	4	3.66667	3.71429	4
813	2	5	2	5	9/20/2012 5:09:03 PM	1	1	1	#NULL!	#NULL!	#NULL!	#NULL!	#NULL!	#NULL!	4	2	4	3	4	4	4	4	3	3	4	2	4	4	3	#NULL!	#NULL!	#NULL!	#NULL!	4	3	#NULL!	#NULL!	#NULL!	#NULL!	#NULL!	#NULL!	#NULL!	4	#NULL!	#NULL!	#NULL!	3.83333	3.57143	4
814	1	4	2	2	9/22/2012 9:17:50 PM	1	1	1	#NULL!	#NULL!	3	3	2	4	3	1	5	3	3	3	3	1	3	1	1	4	2	2	3	5	3	#NULL!	5	3	5	4	4	4	3	4	4	3	1	3	3	2	3.33333	1.85714	4
815	2	5	2	5	9/24/2012 10:28:38 AM	1	1	1	1	1	2	2	2	3	4	3	3	3	3	3	3	3	3	3	3	4	2	1	2	3	2	#NULL!	4	3	5	4	3	5	3	3	2	3	3	3	3	3	3.16667	2.42857	3
825	2	5	2	5	40978.560601851852	1	1	1	1	1	3	3	1	4	4	2	4	3	5	4	4	4	4	4	4	3	3	3	3	5	#NULL!	#NULL!	5	4	1	2	2	1	#NULL!	5	#NULL!	3	3	4	4	4	4	3.57143	4.66667
826	2	5	2	5	41162.626967592594	1	1	1	2	1	2	2	2	2	4	2	4	3	3	4	3	3	3	2	2	3	3	4	3	5	3	#NULL!	5	3	4	4	5	3	2	4	3	3	3	3	4	1	3.5	2.85714	4
831	2	5	2	5	11/16/2012 1:59:25 PM	1	1	1	#NULL!	#NULL!	3	4	2	5	4	3	3	4	4	4	3	3	4	4	4	2	4	3	4	4	3	#NULL!	4	4	4	3	4	3	3	4	3	4	3	3	3	4	3.66667	3.71429	3.75
832	5	1	1	6	41396.695381944446	1	1	0	3	2	2	2	2	2	4	3	3	4	4	4	2	4	3	4	4	3	3	3	3	4	3	#NULL!	4	3	4	#NULL!	4	4	2	4	2	3	1	4	4	4	3.5	3.42857	3.5
833	5	1	1	6	41396.875578703701	1	1	0	3	2	2	4	2	5	3	3	3	3	3	3	2	1	3	3	3	3	3	3	2	4	3	#NULL!	4	1	4	#NULL!	4	1	2	5	2	4	2	2	5	4	2.83333	2.57143	3
834	5	1	1	6	41457.544444444444	1	1	0	3	2	2	3	2	2	4	2	4	3	4	4	4	3	4	3	4	4	2	4	3	4	3	#NULL!	4	4	2	#NULL!	2	2	3	3	1	3	2	4	4	4	3.83333	3.28571	3.75
836	5	1	1	6	41488.72896990741	1	1	0	3	2	2	2	2	2	5	4	2	4	4	4	4	4	4	4	4	2	4	3	3	4	4	#NULL!	4	3	3	#NULL!	4	3	3	4	3	3	1	4	3	5	3.83333	3.71429	3.75
837	5	1	1	6	41488.855578703704	1	1	0	3	2	4	4	2	5	4	3	3	3	4	4	4	4	3	3	3	4	2	4	3	4	3	#NULL!	4	4	5	#NULL!	4	4	3	2	3	3	2	3	3	2	3.66667	3.14286	3.75
838	5	1	1	6	41488.877488425926	1	1	0	2	1	2	3	1	3	3	3	3	3	3	3	3	3	1	1	1	3	3	2	2	4	2	#NULL!	4	3	3	#NULL!	2	1	2	4	1	2	1	2	3	3	3	1.85714	3.25
839	5	1	1	6	41488.926261574074	1	1	0	2	1	4	4	1	5	3	1	5	5	3	5	3	5	5	1	1	1	5	5	3	5	5	#NULL!	5	3	1	#NULL!	1	1	1	5	1	5	5	1	5	1	4	3.57143	4.5
840	5	1	1	6	41519.712418981479	1	1	0	2	1	4	4	1	4	5	2	4	3	4	5	4	4	4	5	3	2	4	4	4	4	2	#NULL!	4	3	2	#NULL!	4	3	3	3	3	4	4	4	2	4	4.16667	4	3.25
841	5	1	1	6	41519.870740740742	1	1	0	2	1	4	4	1	5	5	2	4	4	5	5	3	4	4	4	4	2	4	4	4	5	4	#NULL!	5	4	4	#NULL!	4	4	2	4	2	4	4	4	5	4	4.33333	4	4.5
842	5	1	1	6	41549.023090277777	1	1	0	3	2	3	3	2	4	1	5	1	1	1	4	1	3	1	1	1	5	1	1	1	2	1	#NULL!	4	1	5	#NULL!	5	5	1	2	1	2	1	1	1	1	1.5	1.28571	2
843	5	1	1	6	41549.024571759262	1	1	0	3	2	2	4	2	5	4	3	3	2	4	4	2	4	4	2	4	2	4	4	4	4	4	#NULL!	4	4	4	#NULL!	4	2	2	3	2	2	4	2	4	3	3.16667	3.71429	4
844	5	1	1	6	41549.09815972222	1	1	0	3	2	2	2	2	3	2	2	4	2	4	4	2	3	2	2	4	2	4	4	2	4	3	#NULL!	4	4	3	#NULL!	2	2	3	3	1	3	3	3	2	3	3	3	3.75
845	5	1	1	6	41549.195543981485	1	1	0	3	2	3	4	2	4	4	3	3	3	4	4	3	4	2	5	3	4	2	4	2	4	2	#NULL!	4	3	4	#NULL!	3	3	2	3	2	2	3	3	3	3	3.5	3.14286	3.25
846	5	1	1	6	41549.713194444441	1	1	0	3	2	2	2	2	2	4	2	4	3	5	4	3	4	5	5	4	4	2	3	4	5	1	#NULL!	5	4	2	#NULL!	3	1	2	4	3	3	1	4	3	5	3.83333	3.85714	3.75
847	5	1	1	6	41549.863402777781	1	1	0	3	2	4	4	2	5	4	4	2	3	2	4	2	3	2	5	3	3	3	3	3	4	4	#NULL!	4	4	5	#NULL!	4	4	2	4	2	2	1	4	4	4	2.83333	3.14286	4
848	5	1	1	6	41580.376782407409	1	1	0	2	1	2	2	1	3	3	2	4	3	4	4	4	4	3	3	1	4	2	4	3	4	2	#NULL!	4	4	3	#NULL!	2	2	2	1	2	1	3	3	1	3	3.66667	2.85714	3.5
849	5	1	1	6	41580.678298611114	1	1	0	3	2	2	2	1	4	3	2	4	3	2	2	3	3	2	2	2	2	4	2	3	4	3	#NULL!	4	4	2	#NULL!	2	2	3	2	3	3	2	4	3	2	2.83333	2.57143	3.75
850	5	1	1	6	41610.501111111109	1	1	0	3	2	2	2	2	2	5	4	2	1	5	5	4	5	1	4	5	3	3	5	3	5	3	#NULL!	5	4	5	#NULL!	1	1	3	3	1	3	3	5	5	5	3.66667	3.71429	4.25
851	5	1	1	6	41610.50576388889	1	1	0	2	1	2	4	1	4	4	2	4	4	4	4	1	4	4	3	3	2	4	4	4	4	3	#NULL!	4	4	3	#NULL!	4	4	2	4	2	2	2	4	2	4	3.5	3.71429	3.75
852	5	1	1	6	2/17/2013 9:12:40 AM	1	1	0	#NULL!	#NULL!	#NULL!	#NULL!	#NULL!	#NULL!	4	3	3	3	4	4	3	4	2	3	4	3	3	4	4	#NULL!	#NULL!	#NULL!	#NULL!	#NULL!	4	#NULL!	4	2	2	3	3	1	#NULL!	3	3	4	3.5	3.42857	#NULL!
853	5	1	1	6	2/18/2013 1:19:07 AM	1	1	0	3	2	4	4	1	5	5	5	1	2	5	5	#NULL!	5	2	4	2	1	5	2	4	4	3	#NULL!	5	4	5	#NULL!	5	4	1	4	1	2	1	4	3	5	3.6	3.42857	4
854	5	1	1	6	2/18/2013 1:59:39 PM	1	1	0	3	2	4	4	2	4	5	1	5	5	5	5	3	5	4	4	4	1	5	4	5	5	4	#NULL!	5	5	4	#NULL!	4	1	4	4	3	4	3	3	4	4	4.66667	4.42857	4.75
855	5	1	1	6	2/18/2013 9:42:05 PM	1	1	0	3	2	2	2	2	2	5	2	4	4	4	4	4	4	4	5	4	2	4	5	4	5	4	#NULL!	4	4	4	#NULL!	4	2	3	4	4	4	3	4	4	4	4.16667	4.28571	4.25
856	5	1	1	6	2/18/2013 11:19:53 PM	1	1	0	3	2	2	2	2	2	4	3	3	4	4	3	3	4	2	4	3	3	3	4	4	4	3	#NULL!	4	4	4	#NULL!	2	3	2	3	2	2	1	3	2	4	3.5	3.42857	3.75
857	5	1	1	6	2/19/2013 10:08:29 AM	1	1	0	3	2	2	4	2	4	4	2	4	4	4	4	4	4	3	3	3	3	3	3	2	5	5	#NULL!	5	4	2	#NULL!	3	3	4	4	3	4	2	3	4	4	4	3	4.75
858	5	1	1	6	2/19/2013 12:47:11 PM	1	1	0	3	2	3	4	2	5	4	2	4	4	5	5	3	4	4	5	5	2	4	4	3	5	4	#NULL!	5	4	2	#NULL!	2	2	3	3	1	3	1	3	3	4	4.16667	4.14286	4.5
859	5	1	1	6	2/19/2013 2:23:11 PM	1	1	0	3	2	4	4	1	5	5	1	5	4	4	5	5	5	5	5	4	1	5	5	4	5	5	#NULL!	5	4	2	#NULL!	2	1	4	5	3	4	4	5	4	5	4.66667	4.71429	4.75
860	5	1	1	6	2/20/2013 9:23:32 AM	1	1	0	3	2	2	#NULL!	2	2	5	2	4	4	4	5	3	4	4	4	4	3	3	3	3	4	4	#NULL!	4	4	4	#NULL!	2	2	3	4	3	2	1	4	4	4	4.16667	3.57143	4
861	5	1	1	6	2/20/2013 12:51:15 PM	1	1	0	2	1	4	4	2	5	4	4	2	4	3	4	3	4	4	4	3	3	3	5	4	4	3	#NULL!	5	3	5	#NULL!	4	4	2	3	3	3	2	3	4	4	3.33333	3.85714	3.75
862	5	1	1	6	2/25/2013 6:48:53 PM	1	1	0	3	2	2	2	2	4	4	4	2	3	4	3	3	2	2	3	4	4	2	4	4	2	2	#NULL!	2	4	4	#NULL!	4	4	2	3	3	2	1	2	3	2	3.16667	3	2.5
863	5	1	1	6	2/27/2013 2:42:03 PM	1	1	0	#NULL!	#NULL!	#NULL!	#NULL!	#NULL!	#NULL!	1	4	2	2	4	4	3	3	3	5	2	2	4	4	4	#NULL!	#NULL!	#NULL!	#NULL!	#NULL!	4	#NULL!	4	4	#NULL!	#NULL!	#NULL!	#NULL!	#NULL!	#NULL!	#NULL!	#NULL!	2.66667	3.57143	#NULL!
864	5	1	1	6	41367.622083333335	1	1	0	1	1	2	2	2	2	5	5	1	5	5	5	3	5	5	5	4	1	5	5	5	5	3	#NULL!	5	5	3	#NULL!	2	2	1	4	2	4	4	3	4	4	4	4.85714	4.5
865	5	1	1	6	41367.65320601852	1	1	0	4	#NULL!	2	4	2	5	5	1	5	4	4	5	5	4	3	3	4	2	4	5	5	5	2	#NULL!	4	5	2	2	4	2	3	4	3	3	4	4	2	3	4.66667	4	4
866	5	1	1	6	41397.584953703707	1	1	0	1	1	1	3	2	3	4	2	4	2	5	4	4	3	4	1	3	2	4	2	4	5	3	#NULL!	5	4	4	#NULL!	3	2	1	3	3	2	5	3	2	4	3.83333	3	4.25
867	5	1	1	6	41397.820428240739	1	1	0	1	1	1	2	1	3	5	2	4	4	3	4	3	4	4	4	3	2	4	4	3	3	4	#NULL!	4	4	2	#NULL!	3	4	2	3	2	3	4	2	4	4	3.83333	3.71429	3.75
868	5	1	1	6	41397.927060185182	1	1	0	3	2	2	4	2	3	5	3	3	3	4	4	2	4	3	3	3	4	2	4	3	4	3	#NULL!	4	3	4	#NULL!	4	5	2	3	1	1	1	3	4	3	3.5	3.14286	3.5
870	5	1	1	6	3/22/2013 3:12:55 PM	1	1	0	3	2	1	1	2	2	4	2	4	2	5	4	3	5	3	3	4	2	4	3	4	5	3	#NULL!	5	5	4	#NULL!	4	3	3	3	3	3	3	5	4	5	3.66667	3.71429	4.5
871	5	1	1	6	3/25/2013 1:40:37 PM	1	1	0	2	1	2	2	2	4	4	2	4	4	4	4	3	3	5	3	3	2	4	4	4	4	2	#NULL!	5	3	4	#NULL!	2	2	2	4	2	4	2	2	3	4	3.83333	3.71429	3.5
872	5	1	1	6	3/25/2013 4:13:34 PM	1	1	0	1	1	2	2	2	2	5	2	4	2	4	4	#NULL!	4	3	4	4	1	5	3	3	3	3	#NULL!	4	4	2	#NULL!	2	1	1	3	3	1	4	1	4	4	3.8	3.71429	3.5
873	5	1	1	6	3/25/2013 7:19:27 PM	1	1	0	3	2	3	4	2	4	5	1	5	5	5	5	2	5	3	4	5	1	5	4	4	5	4	#NULL!	5	5	4	#NULL!	4	4	3	5	2	4	4	3	4	4	4.5	4.28571	4.75
874	5	1	1	6	3/26/2013 8:44:41 AM	1	1	0	2	1	4	4	2	5	5	1	5	5	4	4	4	5	5	5	4	1	5	5	4	5	2	#NULL!	5	4	4	#NULL!	4	3	4	3	4	4	4	4	4	4	4.5	4.71429	4
875	6	1	1	2	3/28/2013 5:11:14 PM	1	1	0	2	1	4	4	1	5	4	4	2	4	5	5	5	5	5	5	4	4	2	3	5	4	1	1	3	5	3	4	3	3	2	3	2	3	1	3	4	5	4.16667	4.14286	2.8
876	6	1	1	2	3/28/2013 10:37:59 PM	1	1	0	1	1	2	2	2	2	4	4	2	3	4	4	4	4	4	4	3	2	4	4	4	4	4	4	4	4	3	4	3	3	1	5	2	4	2	3	2	2	3.5	3.85714	4
877	6	1	1	2	3/29/2013 9:26:00 AM	1	1	0	2	1	2	2	1	3	5	1	5	5	5	5	5	5	5	5	5	1	5	5	5	5	4	4	5	5	4	4	2	3	4	5	5	5	5	4	5	5	5	5	4.6
878	6	1	1	2	3/29/2013 10:17:20 AM	1	1	0	2	1	2	2	1	3	5	5	1	5	5	5	5	5	5	5	3	2	4	5	3	5	2	2	5	4	5	3	4	4	3	5	3	5	1	3	5	5	4.33333	4.28571	3.6
879	6	1	1	2	3/29/2013 10:45:30 AM	1	1	0	#NULL!	#NULL!	#NULL!	#NULL!	#NULL!	#NULL!	#NULL!	#NULL!	#NULL!	#NULL!	#NULL!	#NULL!	#NULL!	#NULL!	#NULL!	#NULL!	#NULL!	#NULL!	#NULL!	#NULL!	#NULL!	#NULL!	#NULL!	#NULL!	#NULL!	#NULL!	#NULL!	#NULL!	#NULL!	#NULL!	#NULL!	#NULL!	#NULL!	#NULL!	#NULL!	#NULL!	#NULL!	#NULL!	#NULL!	#NULL!	#NULL!
880	6	1	1	2	3/29/2013 11:28:52 AM	1	1	0	1	1	2	2	2	2	4	1	5	5	5	4	4	4	5	5	4	1	5	4	4	5	4	4	5	5	2	3	4	2	2	3	2	4	3	3	4	3	4.5	4.42857	4.6
881	6	1	1	2	3/29/2013 1:27:27 PM	1	1	0	#NULL!	#NULL!	#NULL!	#NULL!	#NULL!	#NULL!	5	4	2	2	#NULL!	4	3	4	3	5	4	3	3	2	3	#NULL!	#NULL!	#NULL!	#NULL!	#NULL!	1	1	3	1	1	3	1	1	#NULL!	1	3	3	3.2	3.42857	#NULL!
882	6	1	1	2	3/29/2013 3:49:42 PM	1	1	0	4	#NULL!	3	4	2	3	5	1	5	4	3	4	5	5	5	5	4	1	5	5	4	5	4	4	5	5	4	4	3	2	5	4	3	5	4	4	4	4	4.33333	4.71429	4.6
883	6	1	1	2	3/29/2013 5:54:03 PM	1	1	0	3	2	2	4	2	5	4	1	5	4	4	4	4	4	3	4	4	2	4	5	4	5	3	3	3	5	4	3	4	4	2	3	3	2	1	3	2	2	4.16667	4	3.8
884	6	1	1	2	41278.447523148148	1	1	0	2	1	2	2	1	3	2	5	1	5	5	5	5	5	5	4	5	1	5	5	5	4	4	4	5	5	3	4	3	4	3	4	3	4	3	4	4	4	3.83333	4.85714	4.4
885	6	1	1	2	41278.686469907407	1	1	0	3	2	4	4	2	5	3	4	2	3	4	3	4	3	3	4	3	2	4	4	3	4	2	2	3	3	2	2	2	2	3	4	3	3	2	3	3	4	3.16667	3.42857	2.8
886	5	1	1	6	41278.710763888892	1	1	0	2	1	1	2	1	3	4	2	4	4	4	4	4	5	4	5	3	2	4	4	3	4	3	#NULL!	4	4	4	4	4	3	3	2	2	3	4	3	2	4	4	4	3.75
887	6	1	1	2	41309.583437499998	1	1	0	3	2	2	2	2	5	4	2	4	3	4	4	4	3	4	4	4	2	4	4	4	5	3	3	5	4	5	4	3	3	3	4	2	3	3	4	4	4	3.83333	3.85714	4
888	6	1	1	2	41337.586446759262	1	1	0	#NULL!	#NULL!	#NULL!	#NULL!	#NULL!	#NULL!	3	2	4	4	5	5	5	4	4	4	4	1	5	4	4	#NULL!	#NULL!	#NULL!	#NULL!	#NULL!	4	4	3	2	2	5	2	1	#NULL!	3	3	4	4.33333	4.14286	#NULL!
889	6	1	1	2	41337.616979166669	1	1	0	4	#NULL!	3	3	2	3	5	1	5	4	5	5	5	4	4	5	4	1	5	5	5	5	3	3	5	5	5	4	5	4	3	3	2	4	1	2	2	2	4.83333	4.57143	4.2
890	6	1	1	2	41337.70752314815	1	1	0	2	1	4	4	1	4	4	2	4	4	4	5	4	4	4	4	4	3	3	4	4	4	2	2	2	4	4	4	4	4	2	2	3	2	2	3	3	4	4.16667	3.85714	2.8
891	6	1	1	2	41337.745358796295	1	1	0	1	1	2	2	2	3	3	1	5	4	5	4	5	5	5	5	4	2	4	5	4	5	3	3	5	5	4	2	4	2	3	1	3	3	3	3	4	5	4.33333	4.57143	4.2
892	5	1	1	6	41368.575636574074	1	1	0	4	#NULL!	3	4	2	5	5	1	5	5	5	5	5	5	5	5	5	1	5	5	5	5	3	#NULL!	4	5	4	3	4	3	5	5	3	5	5	5	4	5	5	5	4.25
893	6	1	1	2	41368.758958333332	1	1	0	1	1	1	1	2	2	4	4	2	3	4	5	5	3	4	4	4	1	5	3	4	5	3	3	4	5	2	2	3	3	2	2	3	3	2	4	4	5	3.83333	3.85714	4
894	6	1	1	2	41368.976493055554	1	1	0	1	1	2	2	2	3	4	3	3	3	3	3	4	4	5	4	3	3	3	4	4	4	4	4	4	5	2	2	4	2	2	4	3	3	3	3	4	3	3.33333	3.85714	4.2
895	5	1	1	6	41459.822233796294	1	1	0	4	#NULL!	2	4	1	3	5	2	4	3	4	4	4	5	4	5	4	2	4	2	2	5	3	#NULL!	4	4	4	3	2	2	2	2	3	3	2	4	2	5	4	3.71429	4
896	6	1	1	2	41490.456828703704	1	1	0	2	1	4	#NULL!	1	5	4	1	5	4	5	5	4	5	5	5	5	2	4	5	5	5	3	3	5	4	4	4	3	2	4	3	3	5	5	3	2	4	4.5	4.85714	4
897	6	1	1	2	41521.484317129631	1	1	0	2	1	2	2	2	3	3	2	4	4	4	4	4	4	4	4	4	3	3	4	3	5	4	4	4	4	4	4	5	5	4	4	3	4	2	4	3	4	3.83333	3.71429	4.2
898	6	1	1	2	41551.452280092592	1	1	0	2	1	2	2	1	3	5	1	5	4	5	5	4	4	4	5	4	1	5	4	4	5	2	2	3	4	4	4	2	4	2	3	2	3	4	2	4	2	4.66667	4.28571	3.2
899	6	1	1	2	4/13/2013 1:38:51 PM	1	1	0	2	1	3	4	1	4	5	2	4	4	5	5	2	5	4	4	4	2	4	4	4	4	3	3	4	4	2	2	2	4	2	2	3	2	4	4	4	4	4.16667	4.14286	3.6
900	6	1	1	2	4/14/2013 7:15:05 PM	1	1	0	2	1	2	2	1	4	5	5	1	5	5	5	5	5	5	5	5	1	5	5	5	5	5	5	5	5	2	1	3	1	4	5	3	4	3	5	4	5	4.33333	5	5
901	6	1	1	2	4/18/2013 10:34:23 AM	1	1	0	1	1	1	1	2	2	3	1	5	4	5	4	5	4	4	1	5	1	5	5	5	5	4	4	4	5	4	2	3	3	2	4	3	4	3	5	4	5	4.33333	4.14286	4.4
902	6	1	1	2	4/22/2013 1:22:37 PM	1	1	0	1	1	2	2	1	2	4	2	4	3	3	4	2	3	4	3	2	2	4	3	4	4	2	2	2	2	4	2	2	2	2	2	2	2	2	2	3	2	3.33333	3.28571	2.4
903	6	1	1	2	4/23/2013 2:33:30 PM	1	1	0	#NULL!	#NULL!	#NULL!	#NULL!	#NULL!	#NULL!	5	1	5	4	4	5	4	3	3	1	2	1	5	5	4	#NULL!	#NULL!	#NULL!	#NULL!	#NULL!	2	4	1	2	2	3	3	2	#NULL!	1	5	1	4.5	3.28571	#NULL!
904	6	1	1	2	4/24/2013 2:31:57 PM	1	1	0	2	1	2	2	1	4	5	5	1	4	4	5	5	5	5	5	5	4	2	4	4	5	3	3	4	4	3	4	3	2	4	2	4	4	2	3	3	4	4	4.28571	3.8
905	6	1	1	2	4/28/2013 11:16:43 PM	1	1	0	1	1	3	3	1	3	5	2	4	3	4	5	4	5	5	3	3	2	4	2	4	4	4	4	4	4	5	2	4	3	3	4	3	3	2	4	2	2	4.16667	3.71429	4
906	6	1	1	2	41279.531041666669	1	1	0	3	2	3	3	2	2	4	2	4	4	4	4	4	4	3	4	4	3	3	3	4	4	2	2	3	4	3	4	4	3	3	4	2	2	2	4	3	4	4	3.57143	3
907	6	1	1	2	41583.797268518516	1	1	0	3	2	4	4	1	4	4	2	4	4	4	5	5	5	3	5	4	3	3	4	4	5	2	2	4	4	1	2	2	3	1	3	2	3	2	3	3	1	4.33333	4	3.4
908	5	1	1	6	5/14/2013 4:26:17 PM	1	1	0	#NULL!	#NULL!	#NULL!	#NULL!	#NULL!	#NULL!	#NULL!	#NULL!	#NULL!	#NULL!	#NULL!	#NULL!	#NULL!	#NULL!	#NULL!	#NULL!	#NULL!	#NULL!	#NULL!	#NULL!	#NULL!	#NULL!	#NULL!	#NULL!	#NULL!	#NULL!	#NULL!	#NULL!	#NULL!	#NULL!	#NULL!	#NULL!	#NULL!	#NULL!	#NULL!	#NULL!	#NULL!	#NULL!	#NULL!	#NULL!	#NULL!
910	6	1	1	2	5/22/2013 9:56:38 PM	1	1	0	2	1	2	2	1	4	5	2	4	4	4	5	5	4	5	4	4	2	4	4	4	5	4	5	5	4	2	1	1	1	4	4	3	4	3	4	4	4	4.5	4.14286	4.6
911	6	1	1	2	5/31/2013 4:04:27 PM	1	1	0	#NULL!	#NULL!	#NULL!	#NULL!	#NULL!	#NULL!	#NULL!	#NULL!	#NULL!	#NULL!	#NULL!	#NULL!	#NULL!	#NULL!	#NULL!	#NULL!	#NULL!	#NULL!	#NULL!	#NULL!	#NULL!	#NULL!	#NULL!	#NULL!	#NULL!	#NULL!	#NULL!	#NULL!	#NULL!	#NULL!	#NULL!	#NULL!	#NULL!	#NULL!	#NULL!	#NULL!	#NULL!	#NULL!	#NULL!	#NULL!	#NULL!
912	8	7	2	8	41587.610532407409	1	1	0	4	#NULL!	2	4	2	4	5	1	5	5	4	5	5	5	5	5	3	2	4	5	4	5	2	5	4	5	2	1	5	1	4	4	1	4	1	3	3	5	4.83333	4.42857	4.2
913	8	7	2	8	41587.619768518518	1	1	0	4	#NULL!	4	4	2	4	4	2	4	2	4	5	4	4	4	5	4	4	2	4	4	5	4	5	5	5	1	1	2	1	4	5	2	4	2	3	3	2	3.83333	3.85714	4.8
914	8	7	2	8	41587.62059027778	1	1	0	2	1	2	2	1	3	5	1	5	5	5	5	5	4	4	4	5	1	5	5	5	5	4	5	4	4	5	4	5	4	2	5	2	2	2	5	5	5	5	4.57143	4.4
915	8	7	2	8	41587.647847222222	1	1	0	4	#NULL!	4	4	2	5	5	1	5	4	4	5	5	5	5	5	5	2	4	3	5	5	4	5	4	5	4	4	3	1	3	3	3	4	1	4	4	4	4.66667	4.57143	4.6
916	8	7	2	8	41587.648321759261	1	1	0	2	1	4	4	2	5	5	2	4	5	4	4	5	5	4	4	4	1	5	3	4	5	2	5	5	5	3	3	2	1	3	3	1	3	4	4	3	5	4.5	4.14286	4.4
917	8	7	2	8	41587.648645833331	1	1	0	4	#NULL!	4	4	2	5	5	2	4	2	4	5	4	3	2	4	4	4	2	4	4	5	4	4	4	4	5	4	4	4	2	4	3	3	1	3	2	3	4	3.28571	4.2
918	8	7	2	8	41587.820729166669	1	1	0	4	#NULL!	#NULL!	2	2	4	4	3	3	2	4	4	4	4	3	5	2	2	4	4	2	4	3	4	3	4	2	3	4	4	1	5	1	2	1	2	4	2	3.5	3.42857	3.6
919	8	7	2	8	41617.410902777781	1	1	0	4	#NULL!	3	4	2	2	4	2	4	4	4	2	4	3	2	4	3	3	3	4	2	5	2	4	5	4	4	2	4	4	5	5	3	4	2	3	4	2	3.66667	3	4
920	8	7	2	8	41617.501400462963	1	1	0	4	#NULL!	2	4	2	4	4	2	4	3	5	5	4	4	5	4	4	2	4	4	3	5	3	4	4	5	5	3	4	2	3	5	2	3	1	3	4	3	4.16667	4	4.2
921	8	7	2	8	41617.531886574077	1	1	0	4	#NULL!	4	4	2	5	3	3	3	3	3	4	3	3	3	4	4	3	3	4	3	4	3	3	4	5	4	2	2	2	3	2	3	3	1	3	2	3	3.16667	3.42857	3.8
922	8	7	2	8	9/13/2013 11:01:57 AM	1	1	0	1	1	2	2	2	2	4	3	3	4	4	4	4	4	4	4	4	4	2	4	4	4	2	4	4	4	4	4	4	4	3	4	2	3	2	3	4	4	3.83333	3.71429	3.6
923	8	7	2	8	9/13/2013 1:10:46 PM	1	1	0	1	1	1	2	2	2	5	2	4	3	3	4	4	4	4	2	3	2	4	3	3	4	3	4	4	3	4	4	4	4	3	4	2	4	4	3	3	2	3.83333	3.28571	3.6
924	8	7	2	8	9/13/2013 1:57:29 PM	1	1	0	4	#NULL!	4	#NULL!	2	4	5	1	5	4	4	5	5	3	3	2	4	1	5	4	5	5	4	4	4	4	3	2	2	4	4	4	3	4	1	4	4	4	4.66667	3.71429	4.2
925	8	7	2	8	9/14/2013 2:28:58 PM	1	1	0	4	#NULL!	1	1	2	1	3	1	5	4	4	5	4	4	3	5	5	1	5	5	4	5	4	4	4	5	4	2	3	3	4	5	3	5	3	4	3	4	4.16667	4.42857	4.4
926	8	7	2	8	9/14/2013 9:23:25 PM	1	1	0	2	1	1	1	1	3	4	2	4	4	3	4	4	5	4	4	2	2	4	2	4	5	2	5	5	4	4	4	2	2	1	4	3	4	4	3	5	4	3.83333	3.57143	4.2
927	8	7	2	8	9/15/2013 8:49:24 PM	1	1	0	2	1	2	2	2	3	4	2	4	4	4	4	5	4	4	4	4	2	4	5	3	4	3	4	4	4	5	4	2	2	2	3	3	3	1	3	4	4	4.16667	4	3.8
928	8	7	2	8	9/16/2013 11:44:55 AM	1	1	0	4	#NULL!	2	4	2	4	4	3	3	2	3	4	2	2	2	4	2	4	2	3	2	4	3	3	4	3	3	3	4	3	3	3	2	3	2	3	2	3	3	2.42857	3.4
929	8	7	2	8	9/16/2013 3:27:26 PM	1	1	0	4	#NULL!	4	4	2	4	4	1	5	4	4	5	4	5	3	5	4	1	5	4	5	4	3	4	4	4	4	1	1	5	5	5	3	5	2	3	2	5	4.33333	4.42857	3.8
930	11	8	2	3	9/16/2013 6:32:29 PM	1	1	0	4	#NULL!	4	4	2	4	5	2	4	3	4	5	5	5	4	4	3	2	4	4	3	5	3	4	4	5	2	1	1	2	2	5	2	4	1	3	3	4	4.33333	3.85714	4.2
931	11	8	2	3	9/16/2013 8:46:55 PM	1	1	0	2	1	2	2	1	4	3	1	5	4	3	5	5	4	5	3	4	1	5	4	5	4	3	5	4	4	1	2	3	1	3	4	3	4	3	4	5	4	4.16667	4.28571	4
932	8	7	2	8	9/17/2013 9:58:57 AM	1	1	0	#NULL!	#NULL!	#NULL!	#NULL!	#NULL!	#NULL!	4	2	4	4	3	4	4	4	3	4	4	3	3	3	#NULL!	#NULL!	#NULL!	4	#NULL!	#NULL!	2	2	2	2	1	3	3	3	#NULL!	1	3	3	3.83333	3.5	4
933	11	8	2	3	9/17/2013 3:26:59 PM	1	1	0	2	1	4	4	1	5	4	4	2	2	4	4	4	4	4	5	2	2	4	4	4	4	4	4	4	4	2	4	2	2	3	4	3	4	4	4	4	4	3.33333	3.85714	4
934	8	7	2	8	9/17/2013 4:33:27 PM	1	1	0	4	#NULL!	2	2	2	4	3	4	2	3	4	4	4	4	3	3	4	3	3	4	4	3	3	4	4	4	1	4	4	3	3	5	4	3	1	2	3	2	3.33333	3.57143	3.6
935	11	8	2	3	9/17/2013 8:43:48 PM	1	1	0	2	1	2	2	1	3	5	2	4	4	4	4	5	4	5	5	4	2	4	4	5	4	3	4	4	5	3	2	1	4	2	2	4	3	3	4	4	4	4.33333	4.42857	4
936	11	8	2	3	9/18/2013 8:37:50 AM	1	1	0	4	#NULL!	3	3	1	3	3	4	2	2	3	3	3	2	3	4	2	4	2	3	3	3	3	3	3	3	2	3	4	3	2	4	3	2	2	2	4	2	2.66667	2.71429	3
937	11	8	2	3	9/18/2013 10:46:24 AM	1	1	0	4	#NULL!	2	2	2	4	4	2	4	4	4	5	4	5	3	5	2	2	4	4	4	5	3	5	5	5	1	2	4	4	4	5	2	5	1	4	4	4	4.16667	3.85714	4.6
938	8	7	2	8	9/19/2013 4:08:05 PM	1	1	0	4	#NULL!	1	1	2	#NULL!	3	3	3	3	3	4	3	4	3	3	3	3	3	3	3	3	3	3	3	3	3	3	4	2	3	3	3	3	1	3	3	1	3.16667	3.14286	3
939	11	8	2	3	9/19/2013 5:43:03 PM	1	1	0	2	1	4	4	1	5	5	2	4	4	5	5	5	5	5	5	4	1	5	4	4	5	4	5	5	5	2	2	4	4	2	5	5	4	3	4	4	4	4.66667	4.57143	4.8
940	8	7	2	8	9/20/2013 9:57:20 AM	1	1	0	1	1	2	2	2	2	5	2	4	4	4	4	4	4	3	4	4	2	4	4	3	4	2	4	4	4	5	4	4	2	2	3	1	2	3	3	2	4	4.16667	3.71429	3.6
941	11	8	2	3	9/20/2013 3:20:52 PM	1	1	0	2	1	1	1	1	3	4	1	5	4	5	4	5	5	4	5	3	1	5	5	5	5	3	5	5	5	5	4	4	3	3	5	3	4	3	3	4	3	4.5	4.57143	4.6
942	11	8	2	3	9/20/2013 3:43:13 PM	1	1	0	4	#NULL!	2	3	1	3	4	4	2	3	4	4	4	3	3	4	3	2	4	4	3	4	3	4	4	4	4	2	4	3	4	4	3	2	2	3	2	4	3.5	3.42857	3.8
943	8	7	2	8	9/20/2013 4:48:50 PM	1	1	0	4	#NULL!	1	4	2	4	4	1	5	4	4	4	4	4	4	4	3	2	4	4	4	5	4	4	5	4	2	2	3	2	4	4	4	4	4	3	2	3	4.16667	3.85714	4.4
944	8	7	2	8	9/23/2013 2:19:34 PM	1	1	0	4	#NULL!	3	4	2	5	5	4	2	4	5	5	5	4	3	5	4	2	4	4	5	5	4	1	4	4	2	3	1	1	5	3	1	1	3	3	3	3	4.33333	4.14286	3.6
945	11	8	2	3	9/23/2013 4:31:54 PM	1	1	0	4	#NULL!	4	4	2	4	4	1	5	4	4	5	5	5	5	5	5	1	5	4	5	5	4	5	5	5	4	1	1	1	1	5	3	4	2	5	5	5	4.5	4.85714	4.8
946	7	6	2	7	9/24/2013 9:54:55 AM	1	1	0	4	#NULL!	3	4	1	3	4	1	5	4	4	5	4	4	4	4	4	2	4	3	2	5	3	4	4	4	2	3	4	3	4	4	4	3	4	5	3	5	4.33333	3.57143	4
947	8	7	2	8	9/24/2013 10:08:22 AM	1	1	0	4	#NULL!	4	4	2	5	5	2	4	5	4	5	4	5	4	5	4	2	4	4	4	5	3	4	5	5	4	2	3	2	3	4	3	2	2	3	4	3	4.5	4.28571	4.4
948	11	8	2	3	9/24/2013 10:53:46 AM	1	1	0	2	1	1	1	1	3	4	2	4	5	5	5	5	5	5	5	5	2	4	4	5	5	1	5	5	5	3	3	2	2	5	5	5	5	3	5	4	5	4.66667	4.71429	4.2
949	7	6	2	7	9/24/2013 11:38:54 AM	1	1	0	4	#NULL!	4	4	1	4	2	2	4	4	4	4	3	3	4	3	3	4	2	3	3	4	3	4	3	4	3	4	4	3	3	4	3	2	4	2	4	2	3.5	3	3.6
950	7	6	2	7	9/24/2013 11:40:14 AM	1	1	0	4	#NULL!	3	3	1	4	4	2	4	4	4	3	3	4	4	4	2	1	5	4	4	4	3	4	4	2	4	2	4	2	3	5	3	3	3	3	4	3	3.66667	3.85714	3.4
951	11	8	2	3	9/24/2013 7:51:03 PM	1	1	0	4	#NULL!	4	4	2	5	5	4	2	4	5	5	5	5	5	5	3	3	3	5	4	5	5	4	5	4	5	2	4	2	2	3	3	3	2	3	4	3	4.33333	4.28571	4.6
952	7	6	2	7	9/25/2013 8:34:16 AM	1	1	0	4	#NULL!	3	3	1	3	2	5	1	3	1	5	2	4	4	5	3	2	4	3	5	5	5	4	5	4	3	1	3	2	3	4	3	3	4	4	3	4	2.33333	4	4.6
953	7	6	2	7	9/25/2013 9:16:47 AM	1	1	0	4	#NULL!	4	4	1	4	3	3	3	3	3	5	4	5	5	4	4	2	4	3	4	5	4	5	4	4	2	2	2	3	4	4	4	4	4	3	3	4	3.5	4.14286	4.4
954	11	8	2	3	9/25/2013 2:59:34 PM	1	1	0	2	1	4	4	1	5	4	2	4	4	3	4	4	4	4	4	4	2	4	4	4	4	4	4	4	4	2	2	2	3	2	4	3	3	3	4	3	4	3.83333	4	4
955	7	6	2	7	9/26/2013 9:28:04 AM	1	1	0	4	#NULL!	4	4	1	5	3	1	5	5	4	5	5	5	5	5	4	1	5	4	4	4	2	4	4	5	1	2	1	2	3	5	3	3	4	3	5	4	4.5	4.57143	3.8
956	11	8	2	3	9/26/2013 11:32:19 AM	1	1	0	#NULL!	#NULL!	#NULL!	#NULL!	#NULL!	#NULL!	5	3	3	4	3	4	4	4	3	4	4	2	4	4	4	#NULL!	#NULL!	4	#NULL!	#NULL!	4	2	1	1	1	4	4	#NULL!	1	3	3	2	3.83333	3.85714	4
957	8	7	2	8	9/26/2013 1:24:20 PM	1	1	0	4	#NULL!	2	4	2	4	4	2	4	4	3	5	5	5	4	4	1	1	5	4	3	5	4	5	5	5	4	2	3	3	4	5	2	4	2	4	2	4	4.16667	3.71429	4.8
958	8	7	2	8	9/26/2013 1:45:53 PM	1	1	0	#NULL!	#NULL!	#NULL!	#NULL!	#NULL!	#NULL!	#NULL!	#NULL!	#NULL!	#NULL!	#NULL!	#NULL!	#NULL!	#NULL!	#NULL!	#NULL!	#NULL!	#NULL!	#NULL!	#NULL!	#NULL!	#NULL!	#NULL!	#NULL!	#NULL!	#NULL!	#NULL!	#NULL!	#NULL!	#NULL!	#NULL!	#NULL!	#NULL!	#NULL!	#NULL!	#NULL!	#NULL!	#NULL!	#NULL!	#NULL!	#NULL!
959	7	6	2	7	9/26/2013 2:44:08 PM	1	1	0	4	#NULL!	2	4	1	3	4	5	1	4	5	5	5	5	4	4	4	1	5	4	5	5	2	5	4	5	5	4	4	4	2	4	2	2	5	2	5	2	4	4.42857	4.2
960	11	8	2	3	9/26/2013 3:02:18 PM	1	1	0	4	#NULL!	2	4	2	5	2	4	2	2	5	4	4	4	4	#NULL!	4	4	2	2	4	4	4	5	5	4	4	2	4	4	3	3	2	4	4	4	2	2	3.16667	3.33333	4.4
961	7	6	2	7	9/26/2013 5:26:56 PM	1	1	0	2	1	2	2	1	4	3	4	2	4	4	5	4	4	5	5	4	4	2	2	5	5	4	4	5	2	4	4	4	3	4	4	3	4	4	2	2	2	3.66667	3.85714	4
962	11	8	2	3	9/26/2013 9:13:24 PM	1	1	0	2	1	2	2	1	3	5	2	4	4	5	5	4	4	4	5	4	2	4	3	4	5	5	5	5	5	4	5	5	4	3	4	3	4	2	4	4	4	4.5	4	5
963	11	8	2	3	9/28/2013 10:13:28 AM	1	1	0	4	#NULL!	2	2	2	4	4	4	2	4	3	4	5	3	4	4	3	1	5	5	4	5	2	3	4	5	2	4	2	1	3	5	3	4	2	3	4	3	3.66667	4	3.8
964	11	8	2	3	9/28/2013 11:12:57 AM	1	1	0	2	1	4	4	1	5	5	4	2	3	4	5	4	5	4	4	4	2	4	4	5	5	5	5	5	5	5	2	2	2	4	3	4	4	2	5	3	4	3.83333	4.28571	5
965	8	7	2	8	9/29/2013 10:19:56 AM	1	1	0	4	#NULL!	3	4	2	5	5	2	4	3	4	4	4	4	4	4	4	2	4	3	4	5	4	4	4	5	3	4	3	2	3	5	3	4	1	3	4	4	4	3.85714	4.4
966	11	8	2	3	9/29/2013 11:20:22 AM	1	1	0	4	#NULL!	3	3	2	4	4	3	3	2	4	5	5	5	4	4	2	2	4	2	4	5	4	4	5	5	4	2	4	3	3	5	4	3	1	3	4	4	3.83333	3.57143	4.6
967	8	7	2	8	9/29/2013 12:28:35 PM	1	1	0	4	#NULL!	4	4	2	5	4	2	4	4	3	5	4	4	3	5	4	2	4	2	4	5	3	5	5	5	4	4	5	3	3	5	4	3	2	2	3	2	4	3.71429	4.6
968	8	7	2	8	9/30/2013 8:47:16 AM	1	1	0	4	#NULL!	4	4	2	3	5	1	5	5	5	5	5	5	4	5	5	2	4	4	5	5	4	5	5	5	2	1	2	3	4	5	5	4	2	3	5	4	5	4.57143	4.8
969	11	8	2	3	9/30/2013 9:11:44 AM	1	1	0	4	#NULL!	2	2	2	4	4	2	4	2	4	4	4	4	3	4	4	2	4	3	2	5	4	5	5	4	4	2	3	2	2	4	3	3	2	4	2	4	3.66667	3.42857	4.6
970	8	7	2	8	9/30/2013 9:19:01 AM	1	1	0	4	#NULL!	2	2	2	3	5	1	5	4	4	5	4	4	4	3	5	2	4	4	5	5	3	5	3	5	4	3	4	2	3	3	3	3	1	3	4	4	4.5	4.14286	4.2
971	7	6	2	7	9/30/2013 11:18:00 AM	1	1	0	4	#NULL!	4	4	1	3	4	2	4	4	4	4	4	4	4	4	4	2	4	4	3	4	4	4	4	4	2	3	4	4	4	3	4	3	4	4	4	3	4	3.85714	4
972	7	6	2	7	9/30/2013 12:26:20 PM	1	1	0	2	1	1	1	1	3	4	2	4	4	4	4	4	3	4	4	4	2	4	4	4	4	2	4	4	3	4	2	4	4	4	4	4	4	2	2	2	2	4	3.85714	3.4
973	8	7	2	8	9/30/2013 10:18:58 PM	1	1	0	2	1	2	2	2	3	4	2	4	4	4	4	4	4	3	2	2	2	4	3	4	3	2	4	3	4	4	4	4	3	2	3	3	3	1	3	4	4	4	3.14286	3.2
974	8	7	2	8	41284.415011574078	1	1	0	4	#NULL!	3	3	2	3	4	4	2	3	2	2	4	3	4	5	5	4	2	4	3	4	4	4	4	5	4	3	4	3	3	3	3	3	1	3	3	3	2.83333	3.71429	4.2
975	11	8	2	3	41284.491793981484	1	1	0	4	#NULL!	4	4	2	4	5	2	4	3	3	4	4	#NULL!	4	4	3	2	4	4	4	4	3	3	4	4	2	2	4	2	1	3	3	4	1	3	3	2	3.83333	3.83333	3.6
976	7	6	2	7	41284.882025462961	1	1	0	2	1	4	4	1	5	5	5	1	4	3	4	3	4	4	4	2	2	4	2	2	5	2	4	5	5	4	2	4	3	3	5	2	3	2	2	5	2	3.33333	3.14286	4.2
977	11	8	2	3	41343.475011574075	1	1	0	2	1	4	4	1	5	5	2	4	3	4	5	5	5	4	5	4	2	4	4	4	5	3	4	4	5	4	4	3	4	4	4	4	4	4	4	3	4	4.33333	4.28571	4.2
978	7	6	2	7	41374.621504629627	1	1	0	#NULL!	#NULL!	#NULL!	#NULL!	#NULL!	#NULL!	4	2	4	3	4	4	4	4	4	4	4	3	3	4	4	#NULL!	#NULL!	4	#NULL!	#NULL!	4	4	2	3	3	3	2	4	#NULL!	4	4	4	3.83333	3.85714	4
979	11	8	2	3	41404.594525462962	1	1	0	4	#NULL!	2	2	2	2	4	2	4	3	4	4	5	4	4	4	3	3	3	3	4	3	2	4	3	2	1	2	1	1	4	3	3	3	2	3	3	3	4	3.57143	2.8
980	11	8	2	3	41404.721655092595	1	1	0	4	#NULL!	2	2	2	3	4	2	4	3	4	4	4	4	4	4	4	2	4	5	4	4	3	4	4	3	4	4	1	2	4	5	3	4	1	4	4	4	3.83333	4.14286	3.6
981	8	7	2	8	41496.650370370371	1	1	0	1	1	2	2	1	2	5	2	4	4	4	5	4	4	4	2	2	2	4	4	4	5	3	4	4	4	4	5	4	2	1	5	2	4	4	4	1	4	4.33333	3.42857	4
982	11	8	2	3	41527.601712962962	1	1	0	4	#NULL!	2	2	2	4	4	4	2	2	4	3	5	4	4	4	4	3	3	2	2	5	4	4	4	2	4	4	4	4	4	4	4	2	1	2	4	2	3.33333	3.28571	3.8
983	8	7	2	8	10/14/2013 9:32:23 AM	1	1	0	4	#NULL!	4	4	2	5	4	2	4	2	4	5	4	4	3	4	2	2	4	3	4	4	4	4	4	4	2	2	4	2	3	4	2	4	2	4	2	4	3.83333	3.42857	4
984	8	7	2	8	10/14/2013 5:01:56 PM	1	1	0	4	#NULL!	2	2	2	2	4	2	4	4	2	5	4	4	3	5	4	2	4	4	4	5	4	4	5	5	4	4	4	3	2	4	3	4	1	1	3	1	3.83333	4	4.6
985	8	7	2	8	10/15/2013 3:49:57 PM	1	1	0	#NULL!	#NULL!	#NULL!	#NULL!	#NULL!	#NULL!	#NULL!	#NULL!	#NULL!	#NULL!	#NULL!	#NULL!	#NULL!	#NULL!	#NULL!	#NULL!	#NULL!	#NULL!	#NULL!	#NULL!	#NULL!	#NULL!	#NULL!	#NULL!	#NULL!	#NULL!	#NULL!	#NULL!	#NULL!	#NULL!	#NULL!	#NULL!	#NULL!	#NULL!	#NULL!	#NULL!	#NULL!	#NULL!	#NULL!	#NULL!	#NULL!
986	8	7	2	8	10/27/2013 11:13:45 AM	1	1	0	4	#NULL!	4	4	2	5	3	3	3	4	4	4	3	4	4	4	3	2	4	4	3	4	3	5	4	3	4	4	2	1	3	5	2	4	3	3	4	3	3.5	3.71429	3.8
987	8	7	2	8	10/31/2013 11:22:46 AM	1	1	0	4	#NULL!	3	4	2	5	4	4	2	4	4	5	4	3	4	5	2	3	3	4	4	4	1	4	3	5	4	4	4	3	3	#NULL!	1	2	1	1	2	1	3.83333	3.57143	3.4
988	8	7	2	8	41375.437349537038	1	1	0	4	#NULL!	4	4	2	5	#NULL!	#NULL!	#NULL!	#NULL!	#NULL!	#NULL!	#NULL!	#NULL!	#NULL!	#NULL!	#NULL!	#NULL!	#NULL!	#NULL!	#NULL!	2	2	#NULL!	2	4	#NULL!	#NULL!	#NULL!	#NULL!	#NULL!	#NULL!	#NULL!	#NULL!	1	#NULL!	#NULL!	#NULL!	#NULL!	#NULL!	2.5
989	11	8	2	3	11/14/2013 11:01:19 AM	1	1	0	2	1	4	4	1	5	5	1	5	5	5	5	5	4	4	3	4	2	4	4	5	5	3	5	5	5	3	2	3	3	4	5	4	4	3	4	2	5	5	4	4.6
990	11	8	2	3	11/22/2013 8:32:19 AM	1	1	0	2	1	1	1	1	3	5	2	4	4	4	5	5	5	3	4	3	2	4	3	4	5	4	5	4	5	4	4	4	3	3	4	5	3	4	4	2	4	4.5	3.71429	4.6
1329	17	1	1	9	41889.453020833331	1	1	0	1	1	2	2	2	2	5	3	3	4	5	4	5	4	4	4	3	3	3	4	5	5	4	4	5	4	3	3	4	3	3	4	3	3	4	4	5	5	4.33333	3.85714	4.4
1330	17	1	1	9	41889.526770833334	1	1	0	4	#NULL!	1	1	2	2	3	3	3	3	3	3	4	3	3	2	3	3	3	2	3	4	3	4	4	3	4	3	5	5	3	5	2	3	2	3	3	3	3.16667	2.71429	3.6
1331	18	7	2	2	41889.58489583333	1	1	0	3	2	4	4	1	3	4	2	4	2	4	4	4	4	3	4	4	2	4	4	4	4	2	3	3	2	2	2	4	2	3	4	2	4	2	3	4	4	3.66667	3.85714	2.8
1332	17	1	1	9	41889.592997685184	1	1	0	4	#NULL!	2	2	1	5	3	3	3	4	3	5	3	5	4	4	4	4	2	3	4	5	4	5	5	2	2	2	2	3	3	3	3	3	2	4	3	3	3.5	3.71429	4.2
1333	18	7	2	2	41889.599479166667	1	1	0	3	2	2	2	1	2	4	3	3	3	3	2	4	2	4	4	4	3	3	4	4	4	2	4	3	4	3	4	2	2	2	4	1	2	3	3	2	4	3.16667	3.57143	3.4
1334	17	1	1	9	41889.605983796297	1	1	0	4	#NULL!	4	4	2	4	4	3	3	4	4	4	3	5	5	5	5	2	4	4	4	5	3	5	4	4	2	2	2	2	3	3	3	4	4	4	3	4	3.66667	4.57143	4.2
1335	18	7	2	2	41889.637986111113	1	1	0	3	2	3	4	2	2	4	3	3	2	3	3	3	3	3	2	3	4	2	3	2	4	2	4	4	3	3	4	3	2	1	2	1	2	2	3	2	4	3	2.57143	3.4
1336	17	1	1	9	41889.67255787037	1	1	0	4	#NULL!	3	3	1	4	3	2	4	3	3	5	3	4	4	4	4	2	4	4	#NULL!	5	2	4	4	4	3	4	3	4	3	2	3	3	4	4	3	5	3.5	4	3.8
1337	18	7	2	2	41919.33803240741	1	1	0	4	#NULL!	4	4	2	4	5	1	5	4	3	4	3	4	5	5	4	1	5	4	3	5	2	4	5	2	4	2	5	4	4	5	2	4	3	4	3	5	4	4.28571	3.6
1338	17	1	1	9	41919.439583333333	1	1	0	4	#NULL!	1	1	2	2	3	3	3	3	4	5	4	4	5	1	4	2	4	4	3	5	4	5	5	4	2	3	4	2	3	5	3	4	4	5	4	5	3.66667	3.57143	4.6
1339	17	1	1	9	41919.450057870374	1	1	0	1	1	2	2	2	2	4	1	5	4	4	2	4	4	3	4	2	3	3	4	3	4	3	4	4	4	2	4	3	4	3	3	4	2	1	3	3	4	3.83333	3.28571	3.8
1340	17	1	1	9	41919.455694444441	1	1	0	4	#NULL!	2	2	#NULL!	4	4	4	2	4	4	5	4	3	4	4	4	2	4	3	4	5	2	3	4	4	3	2	4	4	4	2	2	2	2	2	3	2	3.83333	3.71429	3.6
1341	18	7	2	2	41919.49927083333	1	1	0	3	2	2	2	1	4	4	4	2	3	3	4	2	4	3	4	2	4	2	2	3	4	3	4	3	3	5	4	4	4	3	4	2	4	3	3	2	4	3	2.85714	3.4
1342	18	7	2	2	41919.503865740742	1	1	0	3	2	4	4	2	5	3	4	2	3	3	4	4	5	3	4	2	2	4	3	4	3	2	3	3	4	5	4	4	4	2	3	3	2	2	2	3	3	3.16667	3.57143	3
1343	18	7	2	2	41919.513657407406	1	1	0	3	2	4	4	1	5	4	2	4	3	4	4	4	4	4	5	4	2	4	3	4	4	3	5	4	4	4	3	3	2	3	4	3	4	4	4	3	5	3.83333	4	4
1344	18	7	2	2	41919.524293981478	1	1	0	3	2	2	2	2	2	4	2	4	4	4	4	4	4	4	4	4	2	4	4	4	4	3	4	4	3	2	2	2	2	3	3	3	3	4	3	3	4	4	4	3.6
1345	17	1	1	9	41919.558287037034	1	1	0	#NULL!	#NULL!	2	2	#NULL!	2	4	2	4	4	4	4	4	5	4	4	5	1	5	5	3	5	2	4	4	4	2	4	2	2	3	3	4	4	2	4	4	5	4	4.42857	3.8
1346	18	7	2	2	41919.573171296295	1	1	0	3	2	2	2	1	3	4	2	4	3	3	4	4	4	2	4	2	4	2	3	3	4	3	4	4	3	3	3	3	3	3	4	2	3	3	2	4	3	3.66667	2.85714	3.6
1347	18	7	2	2	41919.575208333335	1	1	0	3	2	4	4	1	5	2	3	3	4	3	4	3	4	4	4	2	3	3	3	3	4	3	4	4	4	2	2	2	2	3	2	3	4	2	4	4	4	3.16667	3.28571	3.8
1348	18	7	2	2	41919.577800925923	1	1	0	3	2	4	4	2	3	4	1	5	3	2	4	3	4	4	4	4	2	4	4	4	4	1	2	2	3	3	1	2	4	4	4	3	1	1	1	4	1	3.5	4	2.4
1349	18	7	2	2	41919.586064814815	1	1	0	3	2	4	4	2	5	4	#NULL!	#NULL!	3	2	4	4	3	4	4	4	3	3	4	3	5	3	3	4	4	3	4	4	4	2	2	2	2	2	2	2	2	3.4	3.57143	3.8
1350	17	1	1	9	41919.599212962959	1	1	0	4	#NULL!	4	4	2	5	4	2	4	4	5	5	4	5	5	5	5	4	2	5	4	5	3	5	5	4	4	4	4	4	3	4	2	3	5	4	3	4	4.33333	4.42857	4.4
1351	17	1	1	9	41919.620856481481	1	1	0	4	#NULL!	1	1	2	1	2	1	5	5	4	5	3	5	5	5	5	1	5	5	3	5	3	5	5	5	1	1	1	1	5	5	4	5	4	4	4	4	4	4.71429	4.6
1352	18	7	2	2	41919.62158564815	1	1	0	3	2	4	4	2	5	4	2	4	4	3	5	4	5	4	4	4	2	4	4	4	4	3	4	4	5	3	3	3	4	3	3	3	3	2	4	2	4	4	4.14286	4
1353	17	1	1	9	41919.647581018522	1	1	0	4	#NULL!	3	3	2	3	2	3	3	2	4	3	3	3	3	4	3	5	1	3	3	2	1	4	3	2	2	3	3	4	1	3	3	3	2	3	3	3	2.83333	2.85714	2.4
1354	18	7	2	2	41919.652662037035	1	1	0	3	2	2	2	2	5	4	1	5	5	3	4	5	5	5	5	4	2	4	5	5	5	5	5	5	5	3	2	2	2	4	4	3	4	5	4	5	4	4.33333	4.71429	5
1355	18	7	2	2	41919.653553240743	1	1	0	3	2	4	4	2	5	2	1	5	5	4	5	4	5	4	5	5	1	5	5	5	5	4	3	4	5	3	3	4	4	4	4	3	4	4	3	3	3	4.16667	4.85714	4.2
1356	18	7	2	2	41919.653935185182	1	1	0	3	2	4	4	2	5	5	4	2	4	3	4	3	5	4	4	4	3	3	3	3	4	3	3	4	4	3	4	3	3	1	3	3	2	4	3	3	3	3.5	3.71429	3.6
1357	18	7	2	2	41919.657685185186	1	1	0	3	2	2	2	2	2	3	2	4	2	2	2	3	3	3	2	3	4	2	3	3	4	1	4	3	3	2	4	3	3	2	2	2	2	1	2	3	2	2.66667	2.71429	3
1358	18	7	2	2	41919.662893518522	1	1	0	3	2	3	3	2	4	4	3	3	3	3	3	3	2	3	2	3	3	3	3	3	4	3	3	4	3	2	4	2	4	2	3	2	2	3	4	2	3	3.16667	2.71429	3.4
1359	18	7	2	2	41919.691469907404	1	1	0	3	2	2	2	2	2	4	2	4	3	4	3	4	3	4	4	5	2	4	4	4	4	1	3	4	3	5	3	1	1	4	5	4	4	1	3	3	4	3.66667	4	3
1360	17	1	1	9	41919.695115740738	1	1	0	4	#NULL!	1	1	2	2	3	2	4	4	3	5	3	5	3	4	4	3	3	4	5	5	2	5	5	4	1	2	2	3	3	3	3	3	3	5	5	5	3.66667	4	4.2
1361	17	1	1	9	41919.696643518517	1	1	0	4	#NULL!	1	1	1	4	3	3	3	5	3	5	3	5	4	4	5	2	4	3	4	4	5	5	4	4	4	4	4	3	3	4	3	4	4	5	3	5	3.66667	4.14286	4.4
1362	17	1	1	9	41919.887719907405	1	1	0	4	#NULL!	2	2	1	5	1	5	1	4	2	2	3	4	4	1	4	3	3	3	3	5	3	5	5	4	5	4	5	5	1	5	2	1	1	2	2	3	2.16667	3.14286	4.4
1363	18	7	2	2	41919.912060185183	1	1	0	4	#NULL!	2	4	2	4	3	2	4	3	3	4	3	4	3	3	3	4	2	3	4	4	4	4	4	4	4	4	4	3	2	3	3	2	2	3	3	2	3.33333	3.14286	4
1364	18	7	2	2	41950.368657407409	1	1	0	3	2	4	4	1	5	4	4	2	3	3	4	4	3	4	4	4	2	4	4	4	4	3	4	4	3	4	4	5	4	4	5	2	3	3	2	3	2	3.33333	3.85714	3.6
1365	18	7	2	2	41950.392060185186	1	1	0	3	2	4	4	2	4	4	3	3	3	3	4	4	4	3	2	3	3	3	3	4	4	3	4	4	3	4	3	2	2	2	3	2	2	2	3	3	4	3.5	3.14286	3.6
1366	18	7	2	2	41950.406817129631	1	1	0	3	2	2	2	2	2	3	2	4	4	4	4	4	4	4	4	4	2	4	4	4	4	3	3	4	4	3	2	2	2	3	3	3	3	3	3	3	3	3.83333	4	3.6
1368	18	7	2	2	41950.557002314818	1	1	0	3	2	4	4	2	5	4	3	3	4	3	4	4	4	2	4	3	4	2	4	3	4	3	3	3	4	3	3	4	3	3	3	3	3	3	3	3	3	3.66667	3.14286	3.4
1369	18	7	2	2	41950.596550925926	1	1	0	3	2	4	4	1	4	4	2	4	3	4	4	4	4	2	5	2	3	3	4	2	3	3	4	3	3	2	2	2	2	3	2	2	2	3	3	2	4	3.83333	3.14286	3.2
1370	18	7	2	2	41950.648136574076	1	1	0	3	2	4	4	2	3	2	3	3	3	3	3	3	4	4	2	2	4	2	3	3	4	3	4	4	3	5	4	3	4	3	4	3	3	4	4	4	4	2.83333	2.85714	3.6
1371	18	7	2	2	41950.673506944448	1	1	0	3	2	3	4	1	4	3	2	4	3	4	4	3	3	2	3	3	4	2	4	4	5	2	4	3	4	2	2	3	2	2	3	1	2	3	3	3	4	3.5	3	3.6
1372	18	7	2	2	41950.678460648145	1	1	0	3	2	2	2	2	2	4	4	2	3	2	3	4	4	4	2	3	4	2	3	2	4	4	4	4	2	3	4	3	3	3	2	1	3	1	3	2	2	3	2.85714	3.6
1373	18	7	2	2	41950.678912037038	1	1	0	3	2	4	4	2	4	4	2	4	2	2	4	2	4	4	4	4	3	3	3	3	4	3	4	4	4	5	2	4	4	2	2	2	2	1	2	3	2	3	3.57143	3.8
1374	18	7	2	2	41950.689016203702	1	1	0	3	2	2	2	2	3	3	3	3	3	2	3	4	4	4	2	2	2	4	4	3	4	2	4	3	3	5	4	3	4	2	4	2	3	2	4	2	4	3	3.28571	3.2
1375	18	7	2	2	41950.690115740741	1	1	0	3	2	4	4	1	5	3	3	3	4	4	4	4	4	3	4	4	3	3	3	3	4	3	4	4	4	3	3	4	4	4	4	3	3	3	3	3	2	3.66667	3.42857	3.8
1376	18	7	2	2	41950.903668981482	1	1	0	#NULL!	#NULL!	#NULL!	#NULL!	#NULL!	#NULL!	#NULL!	#NULL!	#NULL!	#NULL!	#NULL!	#NULL!	#NULL!	#NULL!	#NULL!	#NULL!	#NULL!	#NULL!	#NULL!	#NULL!	#NULL!	#NULL!	#NULL!	#NULL!	#NULL!	#NULL!	#NULL!	#NULL!	#NULL!	#NULL!	#NULL!	#NULL!	#NULL!	#NULL!	#NULL!	#NULL!	#NULL!	#NULL!	#NULL!	#NULL!	#NULL!
1377	18	7	2	2	41950.928796296299	1	1	0	3	2	4	4	2	5	3	2	4	4	3	4	3	4	4	4	3	3	3	4	4	4	3	4	4	4	4	4	4	4	3	3	4	3	2	3	4	2	3.5	3.71429	3.8
1380	17	1	1	9	7/13/2014 4:27:15 PM	1	1	0	4	#NULL!	4	4	1	5	3	2	4	3	4	5	3	4	4	4	4	1	5	3	3	4	4	4	4	4	4	2	4	2	3	3	3	3	1	3	3	4	3.66667	3.85714	4
1381	17	1	1	9	7/13/2014 9:12:57 PM	1	1	0	4	#NULL!	4	4	2	5	3	3	3	3	3	5	3	4	5	4	5	4	2	3	4	4	4	4	4	4	5	4	4	3	3	3	3	3	4	4	3	4	3.33333	3.85714	4
1382	18	7	2	2	7/14/2014 1:12:29 AM	1	1	0	3	2	4	4	2	4	3	2	4	2	3	4	4	4	4	4	4	4	2	4	4	5	2	4	4	4	4	4	4	3	4	3	2	4	2	3	2	4	3.33333	3.71429	3.8
1383	18	7	2	2	7/14/2014 8:33:13 AM	1	1	0	3	2	4	4	2	3	2	2	4	4	4	4	5	5	4	4	4	2	4	4	4	4	2	5	4	4	4	2	2	4	4	4	1	4	2	4	3	4	3.83333	4.14286	3.8
1384	18	7	2	2	7/14/2014 8:40:55 AM	1	1	0	3	2	4	4	2	4	4	4	2	2	2	4	2	4	3	4	2	4	2	4	2	4	2	3	3	4	2	2	2	2	2	3	2	2	3	3	3	5	2.66667	3	3.2
1385	18	7	2	2	7/14/2014 9:23:46 AM	1	1	0	3	2	4	4	2	5	4	4	2	4	4	5	5	5	5	5	5	4	2	4	4	5	3	4	5	5	4	5	4	5	3	3	3	3	3	3	3	3	4	4.28571	4.4
1386	18	7	2	2	7/14/2014 10:08:09 AM	1	1	0	4	#NULL!	1	1	2	2	3	2	4	4	3	4	3	4	4	4	4	1	5	4	4	4	4	4	4	4	2	4	4	4	4	4	4	4	4	3	3	4	3.5	4.14286	4
1387	18	7	2	2	7/14/2014 10:20:07 AM	1	1	0	3	2	4	4	2	5	4	2	4	2	3	4	4	4	4	3	3	4	2	4	4	4	3	3	4	2	3	2	2	2	2	3	2	2	2	2	4	2	3.5	3.42857	3.2
1388	17	1	1	9	7/14/2014 11:21:30 AM	1	1	0	4	#NULL!	4	4	2	5	3	2	4	3	3	5	3	5	3	5	5	1	5	4	5	5	4	5	4	5	1	1	1	3	3	5	3	4	2	3	3	3	3.5	4.57143	4.6
1389	18	7	2	2	7/14/2014 11:46:50 AM	1	1	0	3	2	2	2	2	2	4	4	2	3	4	5	4	4	4	4	4	4	2	4	4	5	4	5	4	4	3	2	2	2	2	3	3	2	4	3	2	3	3.66667	3.71429	4.4
1390	18	7	2	2	7/14/2014 11:47:33 AM	1	1	0	3	2	2	2	1	3	3	2	4	1	3	4	2	4	3	5	3	2	4	2	2	5	1	4	3	3	2	2	4	2	3	3	2	2	4	4	4	4	2.83333	3.28571	3.2
1391	17	1	1	9	7/14/2014 1:01:29 PM	1	1	0	4	#NULL!	1	1	2	3	3	2	4	3	3	5	3	4	3	4	4	2	4	2	2	4	1	4	4	2	2	3	2	3	3	3	3	2	4	4	3	4	3.5	3.28571	3
1392	17	1	1	9	7/14/2014 2:09:49 PM	1	1	0	#NULL!	#NULL!	#NULL!	#NULL!	#NULL!	#NULL!	#NULL!	#NULL!	#NULL!	#NULL!	#NULL!	#NULL!	#NULL!	#NULL!	#NULL!	#NULL!	#NULL!	#NULL!	#NULL!	#NULL!	#NULL!	#NULL!	#NULL!	#NULL!	#NULL!	#NULL!	#NULL!	#NULL!	#NULL!	#NULL!	#NULL!	#NULL!	#NULL!	#NULL!	#NULL!	#NULL!	#NULL!	#NULL!	#NULL!	#NULL!	#NULL!
1394	18	7	2	2	7/14/2014 3:05:59 PM	1	1	0	3	2	4	4	1	5	4	3	3	3	4	4	3	4	4	3	3	3	3	4	3	4	3	4	3	3	4	4	5	4	2	4	2	3	1	2	4	2	3.5	3.42857	3.4
1395	18	7	2	2	7/14/2014 3:28:18 PM	1	1	0	4	#NULL!	4	4	2	4	4	3	3	4	3	4	3	4	3	3	4	4	2	2	2	3	2	2	3	2	4	1	4	2	4	4	3	4	2	3	3	4	3.5	2.85714	2.4
1396	18	7	2	2	7/14/2014 3:37:58 PM	1	1	0	3	2	3	3	2	3	2	3	3	4	2	4	3	4	4	4	4	3	3	3	3	3	3	3	3	3	3	2	3	3	3	3	4	3	3	3	3	3	3	3.57143	3
1397	18	7	2	2	7/14/2014 4:07:10 PM	1	1	0	3	2	3	3	2	2	4	4	2	4	4	4	4	3	2	4	2	4	2	4	2	4	4	4	4	1	5	2	4	2	3	3	2	2	2	2	4	2	3.66667	2.71429	3.4
1398	18	7	2	2	7/14/2014 4:18:24 PM	1	1	0	3	2	4	4	2	4	3	2	4	3	4	4	4	3	4	3	2	4	2	2	3	3	1	3	3	1	4	2	3	5	4	3	3	5	2	3	2	3	3.66667	2.71429	2.2
1399	18	7	2	2	7/14/2014 4:42:46 PM	1	1	0	3	2	2	2	2	2	5	2	4	3	4	4	5	4	4	5	3	3	3	2	3	4	3	4	4	4	3	2	3	2	3	3	3	3	2	4	2	4	4.16667	3.42857	3.8
1402	18	7	2	2	7/14/2014 7:07:44 PM	1	1	0	3	2	2	4	1	2	5	2	4	2	2	4	1	3	4	3	3	1	5	4	2	4	4	5	5	2	4	2	4	4	2	2	3	2	2	2	2	2	3	3.42857	4
1403	18	7	2	2	7/14/2014 7:34:35 PM	1	1	0	4	#NULL!	4	4	2	5	3	4	2	2	3	2	4	4	3	2	4	4	2	5	2	4	3	2	4	1	5	2	2	3	3	3	2	4	2	1	3	1	2.66667	3.14286	2.8
1405	18	7	2	2	7/15/2014 10:49:56 AM	1	1	0	4	#NULL!	4	4	2	5	3	3	3	3	3	4	3	3	3	4	4	2	4	3	2	5	3	4	4	2	2	2	2	3	2	3	3	4	4	3	3	4	3.16667	3.28571	3.6
1406	18	7	2	2	7/15/2014 10:54:01 AM	1	1	0	3	2	4	4	2	3	4	3	3	2	4	4	4	4	3	3	2	3	3	4	3	4	2	4	4	2	3	2	4	2	2	4	1	3	4	3	3	3	3.5	3.14286	3.2
1407	18	7	2	2	7/15/2014 3:54:36 PM	1	1	0	3	2	4	4	1	5	4	1	5	4	4	4	4	4	4	4	4	3	3	4	4	5	4	4	5	5	3	3	2	3	2	4	3	4	3	4	4	4	4.16667	3.85714	4.6
1409	18	7	2	2	7/16/2014 10:04:09 AM	1	1	0	3	2	4	4	1	5	2	4	2	3	2	3	2	4	2	4	2	2	4	3	3	3	2	4	3	3	4	4	4	4	2	2	1	2	2	2	2	4	2.33333	3.14286	3
1410	18	7	2	2	7/16/2014 1:54:54 PM	1	1	0	#NULL!	#NULL!	#NULL!	#NULL!	#NULL!	#NULL!	#NULL!	#NULL!	#NULL!	#NULL!	#NULL!	#NULL!	#NULL!	#NULL!	#NULL!	#NULL!	#NULL!	#NULL!	#NULL!	#NULL!	#NULL!	#NULL!	#NULL!	#NULL!	#NULL!	#NULL!	#NULL!	#NULL!	#NULL!	#NULL!	#NULL!	#NULL!	#NULL!	#NULL!	#NULL!	#NULL!	#NULL!	#NULL!	#NULL!	#NULL!	#NULL!
1411	18	7	2	2	7/16/2014 2:12:20 PM	1	1	0	#NULL!	#NULL!	#NULL!	#NULL!	#NULL!	#NULL!	3	3	3	2	3	4	3	3	4	5	4	4	2	5	3	#NULL!	#NULL!	4	#NULL!	#NULL!	4	2	4	2	3	3	3	3	#NULL!	3	4	3	3	3.71429	4
1412	18	7	2	2	7/16/2014 2:59:06 PM	1	1	0	3	2	3	3	2	3	5	3	3	4	4	5	5	4	5	1	5	2	4	4	4	5	4	5	5	4	3	4	1	4	3	3	3	3	3	3	5	4	4.33333	3.85714	4.6
1413	18	7	2	2	7/16/2014 3:03:47 PM	1	1	0	3	2	4	4	2	5	3	3	3	4	3	4	4	4	4	2	3	1	5	4	4	5	2	4	5	4	5	3	5	4	#NULL!	5	3	4	1	3	4	4	3.5	3.71429	4
1414	18	7	2	2	7/16/2014 3:14:56 PM	1	1	0	4	#NULL!	3	3	2	2	4	2	4	3	3	4	2	5	4	4	4	4	2	2	2	4	3	4	4	2	4	3	4	3	4	4	2	4	2	2	4	2	3.33333	3.28571	3.4
1415	18	7	2	2	7/16/2014 4:19:43 PM	1	1	0	3	2	4	4	2	5	3	2	4	4	3	5	4	5	3	5	5	4	2	5	3	4	4	4	4	4	5	4	2	2	3	3	3	3	2	3	3	4	3.83333	4	4
1416	17	1	1	9	7/16/2014 5:20:39 PM	1	1	0	2	1	4	4	2	3	5	1	5	4	5	5	5	4	4	5	4	1	5	5	4	5	3	5	5	2	1	2	5	4	5	5	2	4	4	4	5	4	4.83333	4.42857	4
1417	18	7	2	2	7/16/2014 5:25:01 PM	1	1	0	3	2	4	4	2	5	4	2	4	4	4	2	4	4	3	4	3	1	5	5	4	5	3	4	5	4	1	4	1	2	4	5	3	3	4	3	5	4	3.66667	4	4.2
1418	18	7	2	2	7/16/2014 11:47:20 PM	1	1	0	4	#NULL!	4	4	2	5	3	3	3	2	3	5	3	1	1	4	3	4	2	1	4	5	4	5	5	4	5	4	4	3	1	1	3	3	1	2	3	4	3.16667	2.28571	4.6
1419	18	7	2	2	7/17/2014 7:37:41 AM	1	1	0	4	#NULL!	4	4	1	5	#NULL!	3	3	3	3	4	#NULL!	4	4	3	4	3	3	3	3	5	2	5	5	3	4	2	2	2	3	4	4	4	4	4	3	4	3.25	3.42857	4
1420	17	1	1	9	7/17/2014 8:46:52 AM	1	1	0	4	#NULL!	3	3	2	4	3	2	4	1	3	4	3	2	5	4	1	2	4	1	4	4	3	4	3	2	3	1	4	4	2	2	1	2	2	2	2	2	3	3	3.2
1421	18	7	2	2	7/17/2014 9:21:32 AM	1	1	0	3	2	4	4	2	5	5	1	5	2	3	5	4	4	4	5	3	2	4	5	4	5	2	3	3	5	2	2	1	4	1	5	2	2	1	2	2	2	4	4.14286	3.6
1422	18	7	2	2	7/17/2014 10:05:10 AM	1	1	0	#NULL!	#NULL!	#NULL!	#NULL!	#NULL!	#NULL!	#NULL!	#NULL!	#NULL!	#NULL!	#NULL!	#NULL!	#NULL!	#NULL!	#NULL!	#NULL!	#NULL!	#NULL!	#NULL!	#NULL!	#NULL!	#NULL!	#NULL!	#NULL!	#NULL!	#NULL!	#NULL!	#NULL!	#NULL!	#NULL!	#NULL!	#NULL!	#NULL!	#NULL!	#NULL!	#NULL!	#NULL!	#NULL!	#NULL!	#NULL!	#NULL!
1423	18	7	2	2	7/17/2014 10:06:07 AM	1	1	0	4	#NULL!	2	2	2	4	4	4	2	2	2	2	2	4	2	4	2	2	4	2	1	4	3	4	4	1	2	4	4	4	4	5	1	4	4	1	1	3	2.33333	2.71429	3.2
1424	17	1	1	9	7/17/2014 10:45:20 AM	1	1	0	4	#NULL!	4	4	1	4	3	3	3	3	3	3	3	3	3	3	4	3	3	3	3	2	3	3	2	3	3	3	3	3	3	3	3	3	2	3	3	3	3	3.14286	2.6
1425	18	7	2	2	7/17/2014 11:26:17 AM	1	1	0	3	2	2	2	2	2	3	4	2	2	3	3	4	3	3	4	2	3	3	2	2	4	3	4	4	3	4	4	4	4	3	3	3	3	2	3	2	2	2.83333	2.71429	3.6
1426	18	7	2	2	7/17/2014 1:10:19 PM	1	1	0	3	2	4	4	2	5	4	3	3	3	4	3	3	4	3	2	2	3	3	2	4	4	2	4	3	2	3	1	1	4	2	3	2	2	2	3	2	3	3.33333	2.85714	3
1427	18	7	2	2	7/17/2014 1:50:09 PM	1	1	0	2	1	4	4	1	4	5	1	5	4	4	5	4	5	4	3	4	1	5	4	4	5	3	4	5	4	2	3	3	4	3	3	3	3	4	4	4	4	4.5	4.14286	4.2
1428	18	7	2	2	7/17/2014 2:03:02 PM	1	1	0	3	2	4	4	2	3	4	2	4	4	3	5	4	5	3	4	4	2	4	3	4	4	2	4	4	4	2	2	3	2	3	3	3	3	1	3	3	5	4	3.85714	3.6
1429	18	7	2	2	7/17/2014 3:16:26 PM	1	1	0	3	2	4	4	2	3	4	2	4	2	2	4	4	4	4	4	2	3	3	4	3	4	2	4	3	2	4	2	2	2	3	4	1	2	2	3	2	2	3.33333	3.42857	3
1430	18	7	2	2	7/17/2014 3:23:25 PM	1	1	0	3	2	2	2	2	3	3	4	2	2	3	3	4	3	3	2	2	4	2	3	2	4	1	3	2	1	5	5	4	4	1	1	1	1	1	2	3	5	2.83333	2.42857	2.2
1431	18	7	2	2	7/17/2014 3:37:27 PM	1	1	0	2	1	3	3	1	4	3	3	3	3	3	3	2	3	3	3	3	3	3	3	3	3	3	3	3	3	3	3	3	3	3	3	3	3	3	3	3	3	2.83333	3	3
1432	18	7	2	2	7/17/2014 3:54:23 PM	1	1	0	3	2	4	4	2	4	3	4	2	3	2	4	4	3	3	4	2	3	3	2	4	4	3	4	4	4	3	3	3	3	2	4	2	2	1	4	4	4	3	3	3.8
1433	18	7	2	2	7/17/2014 4:21:16 PM	1	1	0	4	#NULL!	4	4	1	5	5	2	4	4	4	5	3	4	3	5	4	2	4	4	2	5	3	5	5	3	3	3	2	3	4	3	2	2	3	4	2	4	4.16667	3.71429	4.2
1436	18	7	2	2	7/17/2014 9:46:36 PM	1	1	0	4	#NULL!	4	4	2	5	3	3	3	3	3	4	3	5	3	2	1	3	3	5	3	5	5	5	5	5	1	5	1	3	3	3	3	4	5	4	3	4	3.16667	3.14286	5
1438	18	7	2	2	7/18/2014 8:57:47 AM	1	1	0	3	2	4	4	2	4	4	3	3	4	3	4	4	4	4	3	4	4	2	2	2	4	3	3	4	3	2	1	1	1	2	4	1	3	4	2	4	4	3.66667	3	3.4
1439	18	7	2	2	7/18/2014 9:15:44 AM	1	1	0	4	#NULL!	4	4	2	5	4	3	3	3	3	4	3	4	4	4	4	5	1	3	3	3	3	3	3	2	3	4	3	3	3	3	4	4	3	3	3	4	3.33333	3.28571	2.8
1440	18	7	2	2	7/18/2014 9:23:11 AM	1	1	0	3	2	4	4	2	5	4	4	2	3	2	4	3	4	3	4	2	3	3	2	4	5	3	4	4	4	3	4	2	4	1	5	2	2	1	3	4	4	3	3.14286	4
1441	18	7	2	2	7/18/2014 10:26:48 AM	1	1	0	3	2	4	4	2	4	3	3	3	3	4	4	3	3	4	4	3	2	4	3	3	3	1	3	3	2	4	3	3	3	2	2	1	2	1	1	3	4	3.33333	3.42857	2.4
1444	18	7	2	2	7/18/2014 11:03:41 AM	1	1	0	3	2	2	2	2	2	3	2	4	2	3	4	4	4	3	4	3	2	4	4	4	4	3	4	4	3	4	4	4	3	3	3	2	3	1	3	3	2	3.33333	3.71429	3.6
1445	18	7	2	2	7/18/2014 11:07:36 AM	1	1	0	3	2	4	4	2	5	4	2	4	5	2	4	4	4	4	5	4	2	4	4	5	4	2	4	4	4	5	2	5	2	4	5	#NULL!	4	2	3	3	4	3.83333	4.28571	3.6
1446	18	7	2	2	7/18/2014 3:48:38 PM	1	1	0	3	2	4	4	2	4	4	2	4	4	3	3	4	4	4	3	3	2	4	3	4	4	1	3	1	2	4	2	2	2	3	4	3	4	3	4	3	4	3.66667	3.57143	2.2
1447	18	7	2	2	7/19/2014 6:31:43 AM	1	1	0	3	2	4	4	2	3	4	2	4	2	4	5	4	5	4	4	4	2	4	4	4	4	2	4	4	2	1	1	1	1	3	3	1	4	4	5	5	5	3.83333	4.14286	3.2
1448	17	1	1	9	7/19/2014 7:36:43 PM	1	1	0	4	#NULL!	3	3	1	4	4	3	3	3	3	5	4	5	5	5	5	1	5	4	5	5	2	5	5	4	4	2	2	2	1	5	4	2	1	4	3	5	3.66667	4.85714	4.2
1449	18	7	2	2	7/20/2014 2:26:29 PM	1	1	0	2	1	3	3	1	4	5	1	5	4	3	5	5	5	4	5	3	1	5	5	5	5	4	5	5	5	4	2	2	1	4	4	4	2	3	4	3	4	4.5	4.57143	4.8
1450	18	7	2	2	7/20/2014 5:44:27 PM	1	1	0	3	2	4	4	2	4	3	2	4	2	4	2	2	4	4	4	4	2	4	4	4	4	1	2	1	2	1	1	5	5	1	3	3	4	2	4	3	2	2.83333	4	2
1451	18	7	2	2	7/20/2014 6:39:05 PM	1	1	0	#NULL!	#NULL!	#NULL!	#NULL!	#NULL!	#NULL!	#NULL!	#NULL!	#NULL!	#NULL!	#NULL!	#NULL!	#NULL!	#NULL!	#NULL!	#NULL!	#NULL!	#NULL!	#NULL!	#NULL!	#NULL!	#NULL!	#NULL!	#NULL!	#NULL!	#NULL!	#NULL!	#NULL!	#NULL!	#NULL!	#NULL!	#NULL!	#NULL!	#NULL!	#NULL!	#NULL!	#NULL!	#NULL!	#NULL!	#NULL!	#NULL!
1452	18	7	2	2	7/20/2014 8:06:19 PM	1	1	0	3	2	2	2	2	2	2	2	4	4	4	4	4	4	5	4	4	2	4	4	4	4	2	3	4	4	4	2	2	2	3	4	2	2	2	2	2	2	3.66667	4.14286	3.4
1453	17	1	1	9	7/21/2014 6:15:38 AM	1	1	0	4	#NULL!	4	4	2	5	2	4	2	2	3	5	3	3	4	4	3	4	2	4	3	4	3	4	5	4	5	2	5	4	3	5	4	2	1	4	3	5	2.83333	3.28571	4
1454	18	7	2	2	7/21/2014 8:21:00 AM	1	1	0	3	2	4	4	2	5	4	2	4	1	4	4	4	4	4	4	1	2	4	4	4	5	2	3	3	2	2	2	2	2	3	2	2	3	2	2	4	4	3.5	3.57143	3
1455	18	7	2	2	7/21/2014 8:38:53 AM	1	1	0	3	2	2	2	2	2	4	1	5	4	3	5	4	4	4	3	5	2	4	4	4	5	4	4	5	5	4	4	3	4	3	3	3	3	4	4	3	4	4.16667	4	4.6
1456	18	7	2	2	7/21/2014 9:43:56 AM	1	1	0	4	#NULL!	2	2	1	4	3	3	3	2	3	5	2	4	2	4	1	2	4	2	4	5	3	5	5	2	2	2	2	3	3	3	3	2	2	3	3	4	3	3	4
1457	18	7	2	2	7/21/2014 9:50:17 AM	1	1	0	4	#NULL!	4	4	2	4	3	3	3	3	3	4	3	4	3	4	4	3	3	3	2	4	3	4	4	2	2	2	2	2	3	3	3	3	2	4	3	4	3.16667	3.28571	3.4
1458	17	1	1	9	7/21/2014 10:35:03 AM	1	1	0	4	#NULL!	2	3	2	4	3	4	2	1	3	4	4	4	4	5	2	2	4	2	4	3	1	4	4	1	2	2	3	4	3	4	3	3	3	3	4	4	2.83333	3.57143	2.6
1459	18	7	2	2	7/21/2014 12:07:42 PM	1	1	0	#NULL!	#NULL!	#NULL!	#NULL!	#NULL!	#NULL!	4	2	4	3	4	5	3	4	4	4	4	3	3	3	3	#NULL!	#NULL!	4	#NULL!	#NULL!	3	4	2	2	2	2	2	3	#NULL!	4	3	5	3.83333	3.57143	4
1460	18	7	2	2	7/21/2014 12:48:40 PM	1	1	0	2	1	4	4	1	5	4	1	5	4	2	4	3	4	4	4	2	1	5	4	4	3	1	4	4	4	2	1	2	1	2	4	3	4	2	3	3	3	3.66667	3.85714	3.2
1461	18	7	2	2	7/21/2014 1:26:36 PM	1	1	0	3	2	4	4	2	3	3	3	3	3	2	3	3	3	2	2	3	4	2	5	2	4	2	3	3	3	4	3	3	3	4	3	2	3	4	3	3	4	2.83333	2.71429	3
1462	18	7	2	2	7/21/2014 1:38:19 PM	1	1	0	3	2	2	2	2	4	2	4	2	3	2	4	2	4	3	4	3	4	2	4	3	5	3	4	4	2	3	2	3	4	3	3	1	3	2	3	2	2	2.5	3.28571	3.6
1463	18	7	2	2	7/21/2014 1:54:02 PM	1	1	0	3	2	4	4	2	5	4	4	2	4	4	5	4	5	3	3	5	2	4	3	4	4	2	4	4	4	3	2	3	2	3	4	2	2	3	4	3	5	3.83333	3.85714	3.6
1464	18	7	2	2	7/21/2014 2:11:46 PM	1	1	0	3	2	2	2	2	3	4	1	5	5	5	5	5	5	5	5	4	2	4	4	5	5	2	5	4	4	1	2	1	2	3	4	3	3	4	4	4	5	4.83333	4.57143	4
1465	18	7	2	2	7/21/2014 2:15:21 PM	1	1	0	3	2	4	4	2	5	4	4	2	4	4	4	2	4	3	4	2	3	3	2	4	3	2	4	3	2	5	4	5	5	4	4	3	4	2	2	4	4	3.33333	3.14286	2.8
1466	18	7	2	2	7/21/2014 2:40:21 PM	1	1	0	#NULL!	#NULL!	#NULL!	#NULL!	#NULL!	#NULL!	3	4	2	2	2	3	3	3	2	4	2	3	3	2	2	#NULL!	#NULL!	3	#NULL!	#NULL!	3	2	3	4	2	3	2	2	#NULL!	2	2	2	2.5	2.57143	3
1467	18	7	2	2	7/21/2014 3:36:52 PM	1	1	0	4	#NULL!	2	2	1	2	3	1	5	5	3	4	3	4	5	5	5	4	2	4	4	5	2	4	5	4	1	1	1	3	3	4	1	1	2	3	3	4	3.83333	4.14286	4
1468	18	7	2	2	7/21/2014 3:37:03 PM	1	1	0	4	#NULL!	4	4	1	5	3	3	3	3	3	4	3	4	3	3	2	2	4	3	3	2	3	3	2	2	4	4	3	3	2	3	1	2	3	2	3	3	3.16667	3.14286	2.4
1469	18	7	2	2	7/21/2014 3:55:17 PM	1	1	0	3	2	4	4	1	5	2	2	4	3	2	3	4	4	3	3	3	3	3	2	2	4	2	3	2	2	3	4	2	4	2	3	2	3	2	2	3	3	3	2.85714	2.6
1470	18	7	2	2	7/21/2014 9:38:00 PM	1	1	0	#NULL!	#NULL!	#NULL!	#NULL!	#NULL!	#NULL!	1	1	5	1	3	5	1	1	1	3	1	5	1	5	1	#NULL!	#NULL!	3	#NULL!	#NULL!	2	1	5	1	1	2	1	3	#NULL!	3	4	5	2.66667	1.85714	3
1471	18	7	2	2	7/21/2014 10:16:00 PM	1	1	0	2	1	3	3	1	3	4	4	2	4	4	4	4	4	4	4	4	2	4	4	4	4	4	4	4	4	4	4	4	2	4	4	2	4	4	2	2	4	3.66667	4	4
1472	18	7	2	2	7/21/2014 10:22:55 PM	1	1	0	3	2	3	3	2	3	2	4	2	2	2	3	1	3	2	2	4	4	2	2	2	4	2	4	3	4	4	2	2	4	2	3	1	2	2	2	2	2	2	2.42857	3.4
1473	18	7	2	2	7/21/2014 10:37:38 PM	1	1	0	#NULL!	#NULL!	#NULL!	#NULL!	#NULL!	#NULL!	5	2	4	4	4	5	4	5	4	4	4	1	5	2	4	#NULL!	#NULL!	4	#NULL!	#NULL!	2	2	2	2	4	4	4	4	#NULL!	4	4	4	4.33333	4	4
1474	18	7	2	2	7/22/2014 7:32:59 AM	1	1	0	4	#NULL!	2	2	1	3	4	1	5	1	3	4	2	4	2	5	3	4	2	3	2	4	3	4	3	2	2	3	3	3	3	5	1	4	4	3	3	4	3.16667	3	3.2
1475	18	7	2	2	7/22/2014 8:32:24 AM	1	1	0	2	1	3	3	2	4	4	2	4	2	3	3	3	3	2	4	2	3	3	2	2	5	1	3	4	2	4	2	3	4	3	4	1	1	4	3	2	1	3.16667	2.57143	3
1476	18	7	2	2	7/22/2014 8:55:08 AM	1	1	0	3	2	4	4	2	5	4	2	4	4	2	4	4	2	2	4	4	2	4	4	2	2	1	2	2	4	4	4	2	3	2	4	2	2	2	2	2	4	3.66667	3.14286	2.2
1477	18	7	2	2	7/22/2014 10:59:34 AM	1	1	0	3	2	3	4	2	3	4	2	4	4	4	5	2	4	3	4	4	2	4	4	4	4	1	4	4	4	4	2	2	2	4	4	3	4	4	3	4	4	3.83333	3.85714	3.4
1478	18	7	2	2	7/22/2014 11:10:05 AM	1	1	0	4	#NULL!	4	4	2	4	3	3	3	3	3	4	3	4	3	4	4	2	4	3	4	4	3	4	5	3	4	4	4	3	3	4	4	4	3	4	3	4	3.16667	3.71429	3.8
1479	17	1	1	9	7/22/2014 11:10:57 AM	1	1	0	4	#NULL!	2	2	2	2	4	5	1	1	3	2	2	4	2	4	2	5	1	2	2	5	4	4	5	1	5	5	5	5	2	5	1	1	1	1	3	1	2.16667	2.42857	3.8
1480	18	7	2	2	7/22/2014 11:33:39 AM	1	1	0	4	#NULL!	4	4	2	3	3	5	1	2	3	4	2	2	5	5	4	4	2	2	2	5	1	4	5	1	1	5	2	3	2	2	2	2	1	3	3	1	2.5	3.14286	3.2
1481	18	7	2	2	7/22/2014 11:59:29 AM	1	1	0	4	#NULL!	2	2	1	2	3	3	3	3	3	5	3	4	4	5	4	3	3	4	2	4	4	4	4	4	1	2	3	3	3	3	3	3	4	3	3	3	3.33333	3.71429	4
1482	17	1	1	9	7/22/2014 12:08:59 PM	1	1	0	4	#NULL!	3	3	1	3	3	4	2	2	2	2	2	3	4	5	2	3	3	3	2	5	2	4	3	1	4	4	3	3	2	4	2	2	2	2	2	1	2.16667	3.14286	3
1483	18	7	2	2	7/22/2014 12:52:19 PM	1	1	0	3	2	2	2	2	3	4	2	4	3	3	4	3	4	3	4	3	2	4	4	3	4	3	4	3	2	3	4	2	3	3	3	1	2	3	4	3	4	3.5	3.57143	3.2
1484	18	7	2	2	7/22/2014 12:59:35 PM	1	1	0	#NULL!	#NULL!	#NULL!	#NULL!	#NULL!	#NULL!	#NULL!	#NULL!	#NULL!	#NULL!	#NULL!	#NULL!	#NULL!	#NULL!	#NULL!	#NULL!	#NULL!	#NULL!	#NULL!	#NULL!	#NULL!	#NULL!	#NULL!	#NULL!	#NULL!	#NULL!	#NULL!	#NULL!	#NULL!	#NULL!	#NULL!	#NULL!	#NULL!	#NULL!	#NULL!	#NULL!	#NULL!	#NULL!	#NULL!	#NULL!	#NULL!
1485	18	7	2	2	7/22/2014 3:13:06 PM	1	1	0	3	2	4	4	1	5	4	3	3	2	4	4	4	3	4	4	2	2	4	4	3	5	3	5	4	4	5	5	5	4	4	5	3	4	4	4	3	5	3.5	3.42857	4.2
1486	18	7	2	2	7/22/2014 7:13:20 PM	1	1	0	3	2	4	4	2	5	3	3	3	3	3	4	3	3	3	4	4	3	3	4	3	2	2	3	2	2	4	4	3	3	3	3	3	3	2	3	2	3	3.16667	3.42857	2.2
1488	18	7	2	2	7/22/2014 9:04:25 PM	1	1	0	3	2	4	4	2	5	1	1	5	5	5	5	5	5	4	4	5	2	4	5	5	4	3	4	4	4	4	4	4	2	3	3	2	3	3	3	4	4	4.33333	4.57143	3.8
1489	18	7	2	2	7/22/2014 11:06:37 PM	1	1	0	3	2	3	3	2	2	4	4	2	3	3	4	3	3	3	4	3	4	2	2	3	4	3	3	3	3	2	1	1	2	1	2	2	2	2	2	4	2	3.16667	2.85714	3.2
1490	18	7	2	2	7/23/2014 6:18:55 AM	1	1	0	2	1	4	4	1	4	5	1	5	4	5	4	4	5	5	5	5	2	4	2	2	5	4	5	5	4	4	2	1	2	4	4	2	4	5	5	2	5	4.5	4	4.6
1491	18	7	2	2	7/23/2014 11:20:22 AM	1	1	0	3	2	4	4	1	5	3	2	4	3	4	5	4	4	3	4	4	2	4	4	4	4	3	4	4	4	3	2	2	3	3	4	3	4	4	3	4	4	3.83333	3.85714	3.8
1492	18	7	2	2	7/24/2014 9:47:08 AM	1	1	0	#NULL!	#NULL!	#NULL!	#NULL!	#NULL!	#NULL!	#NULL!	#NULL!	#NULL!	#NULL!	#NULL!	#NULL!	#NULL!	#NULL!	#NULL!	#NULL!	#NULL!	#NULL!	#NULL!	#NULL!	#NULL!	#NULL!	#NULL!	#NULL!	#NULL!	#NULL!	#NULL!	#NULL!	#NULL!	#NULL!	#NULL!	#NULL!	#NULL!	#NULL!	#NULL!	#NULL!	#NULL!	#NULL!	#NULL!	#NULL!	#NULL!
1494	17	1	1	9	7/24/2014 3:58:10 PM	1	1	0	4	#NULL!	4	4	2	5	3	1	5	3	4	5	3	4	4	5	5	1	5	5	4	5	4	5	5	4	1	2	2	1	3	4	3	4	2	4	4	4	3.83333	4.57143	4.6
1495	18	7	2	2	7/24/2014 8:35:51 PM	1	1	0	3	2	2	2	2	2	4	2	4	4	4	4	4	4	5	4	4	2	4	4	4	4	4	4	4	4	2	2	1	2	3	4	2	3	2	4	4	4	4	4.14286	4
1496	17	1	1	9	7/25/2014 8:37:11 AM	1	1	0	1	1	1	1	2	2	3	3	3	3	3	4	4	4	3	4	3	2	4	2	2	5	4	5	5	4	4	3	3	2	4	4	4	4	2	5	3	5	3.33333	3.14286	4.6
1497	18	7	2	2	7/25/2014 8:52:57 AM	1	1	0	#NULL!	#NULL!	#NULL!	#NULL!	#NULL!	#NULL!	4	2	4	3	4	5	3	2	1	1	3	2	4	4	2	#NULL!	#NULL!	#NULL!	#NULL!	#NULL!	4	3	5	4	1	3	#NULL!	#NULL!	#NULL!	#NULL!	2	#NULL!	3.83333	2.42857	#NULL!
1498	18	7	2	2	7/25/2014 11:41:22 AM	1	1	0	3	2	4	4	2	3	2	5	1	1	2	1	1	4	3	5	1	5	1	2	1	1	1	1	1	1	4	5	1	5	1	1	1	1	4	4	1	4	1.33333	2.42857	1
1499	18	7	2	2	7/25/2014 10:16:50 PM	1	1	0	#NULL!	#NULL!	#NULL!	#NULL!	#NULL!	#NULL!	3	3	3	3	4	4	3	3	1	4	3	4	2	3	3	#NULL!	#NULL!	3	#NULL!	#NULL!	4	4	4	4	1	1	1	1	#NULL!	3	3	4	3.33333	2.71429	3
1502	17	1	1	9	7/26/2014 10:52:41 PM	1	1	0	4	#NULL!	1	1	1	3	2	2	4	4	2	4	4	4	2	4	3	3	3	4	2	5	4	4	5	5	2	2	4	4	4	4	4	4	1	4	3	5	3.33333	3.14286	4.6
1503	18	7	2	2	7/27/2014 3:32:20 PM	1	1	0	3	2	2	2	2	2	4	2	4	3	4	4	4	4	4	4	2	2	4	4	4	4	3	5	4	3	2	2	4	2	2	4	3	2	4	4	4	2	3.83333	3.71429	3.8
1504	17	1	1	9	7/29/2014 10:49:18 AM	1	1	0	4	#NULL!	2	2	2	4	3	3	3	1	3	1	2	2	2	3	1	5	1	2	2	5	2	4	5	2	5	4	5	4	2	3	1	1	2	1	2	2	2.16667	1.85714	3.6
1505	18	7	2	2	7/29/2014 1:39:02 PM	1	1	0	2	1	4	4	1	5	3	4	2	3	3	5	4	3	4	4	2	5	1	4	4	1	5	1	1	4	5	4	4	3	3	4	2	1	1	1	4	1	3.33333	3.14286	2.4
1506	18	7	2	2	7/29/2014 8:19:38 PM	1	1	0	3	2	3	3	1	4	3	3	3	1	1	1	2	3	3	1	1	5	1	3	1	3	1	3	3	1	3	3	1	4	1	2	1	1	1	1	1	1	1.83333	1.85714	2.2
1507	18	7	2	2	7/30/2014 9:10:13 AM	1	1	0	3	2	4	4	1	5	4	2	4	4	4	4	4	4	3	4	5	1	5	5	3	5	3	4	4	4	2	3	2	2	3	4	3	3	2	3	3	4	4	4.14286	4
1508	17	1	1	9	7/30/2014 1:58:31 PM	1	1	0	4	#NULL!	4	4	1	5	4	3	3	3	4	5	3	4	4	5	5	4	2	4	4	5	1	5	5	5	4	4	4	3	3	3	3	4	2	4	4	4	3.66667	4	4.2
1509	18	7	2	2	7/30/2014 2:48:15 PM	1	1	0	3	2	2	2	2	2	4	3	3	2	4	4	#NULL!	4	4	4	3	4	2	3	2	4	4	4	4	2	2	2	3	3	3	3	1	2	2	2	1	2	3.4	3.14286	3.6
1510	17	1	1	9	7/31/2014 10:44:53 AM	1	1	0	4	#NULL!	4	4	2	4	2	4	2	2	2	2	2	4	2	4	2	5	1	2	1	4	2	2	4	2	4	2	4	2	2	4	#NULL!	2	2	2	2	2	2	2.28571	2.8
1511	18	7	2	2	7/31/2014 9:00:15 PM	1	1	0	3	2	2	2	2	2	5	1	5	4	5	5	4	5	4	5	4	1	5	5	4	5	4	5	5	5	2	1	4	1	4	3	3	4	5	5	4	5	4.66667	4.57143	4.8
1512	18	7	2	2	7/31/2014 9:29:32 PM	1	1	0	3	2	3	3	2	3	5	2	4	4	4	5	4	4	3	5	4	2	4	4	2	5	3	5	5	4	4	2	5	1	3	3	3	3	5	4	4	5	4.33333	3.71429	4.4
1513	18	7	2	2	41706.429456018515	1	1	0	3	2	4	4	2	5	2	3	3	4	2	3	3	3	3	2	2	3	3	3	3	4	1	3	2	4	4	3	3	2	3	3	2	2	5	3	2	4	2.83333	2.71429	2.8
1514	18	7	2	2	41737.64644675926	1	1	0	4	#NULL!	4	4	2	3	1	3	3	2	3	1	3	3	3	3	3	5	1	3	3	2	3	2	2	3	2	1	1	1	1	3	3	1	2	4	3	3	2.16667	2.71429	2.4
1515	17	1	1	9	41737.784432870372	1	1	0	#NULL!	#NULL!	#NULL!	#NULL!	#NULL!	#NULL!	4	4	2	3	4	4	3	4	4	4	3	3	3	2	3	#NULL!	#NULL!	5	#NULL!	#NULL!	4	3	5	4	3	4	3	2	#NULL!	2	2	2	3.33333	3.28571	5
1516	18	7	2	2	41767.522164351853	1	1	0	3	2	2	2	1	2	4	2	4	2	2	4	2	4	4	4	3	3	3	4	4	5	4	4	5	4	4	2	4	2	3	2	2	3	2	3	5	4	3	3.71429	4.4
1517	18	7	2	2	41767.559016203704	1	1	0	3	2	4	4	2	5	3	3	3	3	3	4	3	2	4	3	2	3	3	3	3	4	3	3	4	3	#NULL!	1	3	3	3	5	3	3	3	3	3	4	3.16667	2.85714	3.4
1518	18	7	2	2	41767.569050925929	1	1	0	3	2	4	4	2	3	4	2	4	4	4	3	3	4	4	2	3	4	2	4	3	2	3	3	2	2	3	2	3	4	2	4	2	2	2	3	2	3	3.66667	3.14286	2.4
1520	17	1	1	9	41767.751458333332	1	1	0	4	#NULL!	2	2	2	2	2	4	2	2	3	4	2	4	2	2	2	2	4	1	4	4	2	4	4	1	5	4	5	4	2	2	2	2	1	2	2	2	2.5	2.71429	3
1521	18	7	2	2	41767.834606481483	1	1	0	4	#NULL!	4	4	2	4	3	3	3	3	2	3	2	3	3	3	3	3	3	3	3	4	2	3	4	2	3	5	3	4	2	2	3	3	1	3	3	3	2.66667	3	3
1522	18	7	2	2	41767.981493055559	1	1	0	3	2	3	3	2	3	3	3	3	3	2	4	3	3	4	4	3	4	2	4	2	4	3	4	3	2	4	4	5	3	2	3	5	2	1	3	2	3	3	3.14286	3.2
1523	18	7	2	2	41767.985451388886	1	1	0	3	2	2	2	1	2	4	2	4	2	4	4	3	3	4	4	4	4	2	3	3	4	2	3	4	4	3	2	4	2	4	4	2	3	1	4	3	4	3.5	3.28571	3.4
1525	18	7	2	2	41798.490162037036	1	1	0	3	2	4	4	2	4	5	4	2	2	3	5	5	4	4	5	4	2	4	4	4	5	3	4	3	4	2	2	2	1	1	3	2	3	2	3	3	4	3.66667	4.14286	3.8
1526	18	7	2	2	41798.628634259258	1	1	0	2	1	1	1	1	3	5	1	5	3	3	5	5	5	3	4	3	2	4	3	4	5	3	5	4	5	2	2	2	2	4	5	3	3	4	3	4	4	4.33333	3.71429	4.4
1527	18	7	2	2	41798.677662037036	1	1	0	3	2	4	4	1	5	3	3	3	3	3	4	3	3	3	3	3	3	3	3	3	#NULL!	2	2	2	2	5	1	2	2	3	3	1	3	2	3	3	4	3.16667	3	2
1528	18	7	2	2	41798.808888888889	1	1	0	#NULL!	#NULL!	#NULL!	#NULL!	#NULL!	#NULL!	#NULL!	#NULL!	#NULL!	#NULL!	#NULL!	#NULL!	#NULL!	#NULL!	#NULL!	#NULL!	#NULL!	#NULL!	#NULL!	#NULL!	#NULL!	#NULL!	#NULL!	#NULL!	#NULL!	#NULL!	#NULL!	#NULL!	#NULL!	#NULL!	#NULL!	#NULL!	#NULL!	#NULL!	#NULL!	#NULL!	#NULL!	#NULL!	#NULL!	#NULL!	#NULL!
1529	18	7	2	2	41828.370740740742	1	1	0	3	2	4	4	2	3	4	4	2	4	4	4	4	4	4	4	3	2	4	4	3	5	4	4	4	5	3	2	3	3	3	3	3	3	4	3	4	3	3.66667	3.71429	4.4
1530	18	7	2	2	41828.551076388889	1	1	0	3	2	4	4	2	4	4	1	5	4	5	5	4	4	4	4	2	2	4	4	4	5	2	4	5	4	5	4	2	2	4	1	1	1	1	1	1	4	4.5	3.71429	4
1531	18	7	2	2	41828.654918981483	1	1	0	4	#NULL!	4	4	1	5	4	3	3	2	4	4	2	4	5	4	4	4	2	4	4	4	3	4	4	4	5	3	4	4	4	2	2	4	2	4	2	4	3.16667	3.85714	3.8
1532	18	7	2	2	41828.656504629631	1	1	0	2	1	2	2	1	4	4	2	4	3	2	4	4	4	4	4	4	1	5	3	4	4	2	3	3	2	4	2	3	3	2	2	2	3	3	4	3	4	3.5	4	2.8
1533	18	7	2	2	41828.661863425928	1	1	0	3	2	4	4	2	3	3	4	2	4	3	4	4	4	4	3	3	3	3	2	3	4	3	4	3	4	3	3	2	3	2	3	3	3	3	4	3	4	3.33333	3.14286	3.6
1534	18	7	2	2	41828.667673611111	1	1	0	3	2	2	2	2	2	5	2	4	4	3	4	3	4	2	2	4	2	4	4	2	5	4	4	4	2	4	2	3	3	2	2	2	2	2	4	3	4	3.83333	3.14286	3.8
1535	18	7	2	2	41859.622071759259	1	1	0	4	#NULL!	4	4	2	3	#NULL!	#NULL!	#NULL!	#NULL!	#NULL!	#NULL!	#NULL!	#NULL!	#NULL!	#NULL!	#NULL!	#NULL!	#NULL!	#NULL!	#NULL!	3	2	#NULL!	3	3	#NULL!	#NULL!	#NULL!	#NULL!	#NULL!	#NULL!	#NULL!	#NULL!	2	#NULL!	#NULL!	#NULL!	#NULL!	#NULL!	2.75
1536	18	7	2	2	41920.474293981482	1	1	0	3	2	3	4	2	4	4	2	4	3	4	4	4	4	3	3	3	2	4	3	3	4	3	4	4	4	2	3	4	3	3	3	2	2	4	3	2	4	3.83333	3.28571	3.8
1537	18	7	2	2	41920.581608796296	1	1	0	3	2	3	3	2	3	4	2	4	4	4	4	4	4	4	4	3	2	4	4	4	4	2	4	3	3	4	4	4	3	2	4	3	3	4	3	3	4	4	3.85714	3.2
1540	18	7	2	2	41951.393530092595	1	1	0	3	2	2	2	2	2	4	3	3	3	4	4	4	4	3	4	2	3	3	3	2	4	2	3	3	4	5	3	3	3	2	4	3	4	4	3	3	2	3.66667	3	3.2
1542	18	7	2	2	41951.628391203703	1	1	0	2	1	3	3	1	4	4	2	4	4	4	4	5	4	4	4	4	2	4	3	4	4	4	4	4	4	3	4	4	3	2	4	2	2	4	3	4	4	4.16667	3.85714	4
1543	18	7	2	2	41981.379861111112	1	1	0	4	#NULL!	4	4	1	3	3	2	4	3	4	4	3	4	3	4	4	2	4	4	4	5	3	4	4	3	3	2	2	4	4	4	2	2	4	3	3	5	3.5	3.85714	3.8
1544	18	7	2	2	41981.576932870368	1	1	0	3	2	4	4	2	5	4	3	3	3	2	5	3	3	3	3	4	2	4	5	3	4	2	3	3	2	2	2	2	2	3	4	3	3	2	3	3	4	3.33333	3.57143	2.8
1545	18	7	2	2	8/13/2014 11:52:44 AM	1	1	0	3	2	4	4	2	4	4	1	5	2	4	4	5	3	1	4	1	1	5	5	5	5	2	4	3	2	2	2	2	2	1	3	1	2	4	2	4	2	4	3.42857	3.2
1546	18	7	2	2	8/13/2014 3:14:51 PM	1	1	0	3	2	2	2	2	2	2	4	2	1	4	2	3	4	3	5	4	2	4	1	2	5	4	5	5	4	4	2	2	4	4	3	3	4	2	4	4	5	2.33333	3.28571	4.6
1548	18	7	2	2	8/14/2014 8:58:10 AM	1	1	0	2	1	4	4	1	5	#NULL!	#NULL!	#NULL!	#NULL!	#NULL!	#NULL!	#NULL!	#NULL!	#NULL!	#NULL!	#NULL!	#NULL!	#NULL!	#NULL!	#NULL!	5	3	#NULL!	4	4	#NULL!	#NULL!	#NULL!	#NULL!	#NULL!	#NULL!	#NULL!	#NULL!	4	#NULL!	#NULL!	#NULL!	#NULL!	#NULL!	4
1549	18	7	2	2	8/14/2014 11:07:17 AM	1	1	0	3	2	4	4	2	4	3	3	3	2	3	3	3	4	4	3	2	4	2	2	3	4	3	3	3	3	3	2	4	3	4	4	2	3	2	3	2	3	2.83333	2.85714	3.2
1550	18	7	2	2	8/14/2014 2:21:15 PM	1	1	0	#NULL!	#NULL!	#NULL!	#NULL!	#NULL!	#NULL!	#NULL!	#NULL!	#NULL!	#NULL!	#NULL!	#NULL!	#NULL!	#NULL!	#NULL!	#NULL!	#NULL!	1	5	#NULL!	#NULL!	#NULL!	#NULL!	#NULL!	#NULL!	#NULL!	#NULL!	#NULL!	#NULL!	#NULL!	#NULL!	#NULL!	#NULL!	#NULL!	#NULL!	#NULL!	#NULL!	#NULL!	#NULL!	5	#NULL!
1552	18	7	2	2	8/15/2014 10:10:50 AM	1	1	0	3	2	2	2	2	3	3	2	4	3	4	4	4	3	3	3	4	3	3	4	3	3	3	3	3	3	3	2	2	2	3	3	2	2	2	2	3	2	3.66667	3.28571	3
1553	18	7	2	2	8/15/2014 7:44:00 PM	1	1	0	4	#NULL!	2	4	1	5	3	3	3	3	3	4	3	4	3	5	2	4	2	4	4	4	3	4	4	3	2	4	2	3	3	3	3	4	4	3	3	3	3.16667	3.42857	3.6
1554	18	7	2	2	8/15/2014 9:43:11 PM	1	1	0	3	2	3	4	2	3	4	2	4	4	4	5	3	5	4	5	4	2	4	3	4	4	2	4	3	3	3	3	3	2	3	3	3	3	5	4	4	4	4	4.14286	3.2
1555	18	7	2	2	8/19/2014 11:24:41 AM	1	1	0	2	1	1	1	1	3	5	5	1	4	5	5	5	3	3	4	2	2	4	5	4	5	4	5	5	5	5	4	4	4	3	4	3	3	2	3	2	3	4.16667	3.57143	4.8
1556	18	7	2	2	8/19/2014 3:16:05 PM	1	1	0	3	2	4	4	2	4	3	3	3	3	3	4	3	3	3	4	2	3	3	3	3	4	3	3	3	3	3	4	3	2	3	3	2	3	2	2	3	2	3.16667	3	3.2
1557	18	7	2	2	8/20/2014 3:38:38 PM	1	1	0	#NULL!	#NULL!	#NULL!	#NULL!	#NULL!	#NULL!	5	#NULL!	#NULL!	#NULL!	#NULL!	#NULL!	4	#NULL!	#NULL!	#NULL!	#NULL!	2	4	#NULL!	4	#NULL!	#NULL!	#NULL!	#NULL!	#NULL!	#NULL!	#NULL!	#NULL!	#NULL!	#NULL!	#NULL!	#NULL!	#NULL!	#NULL!	#NULL!	#NULL!	#NULL!	4.5	4	#NULL!
1558	18	7	2	2	8/20/2014 3:53:09 PM	1	1	0	#NULL!	#NULL!	#NULL!	#NULL!	#NULL!	#NULL!	3	3	3	5	3	5	3	5	3	5	5	2	4	3	5	#NULL!	#NULL!	5	#NULL!	#NULL!	5	5	5	3	3	5	2	3	#NULL!	5	3	5	3.66667	4.28571	5
1559	18	7	2	2	8/21/2014 9:44:23 AM	1	1	0	#NULL!	#NULL!	#NULL!	#NULL!	#NULL!	#NULL!	#NULL!	#NULL!	#NULL!	#NULL!	#NULL!	#NULL!	#NULL!	#NULL!	#NULL!	#NULL!	#NULL!	#NULL!	#NULL!	#NULL!	#NULL!	#NULL!	#NULL!	#NULL!	#NULL!	#NULL!	#NULL!	#NULL!	#NULL!	#NULL!	#NULL!	#NULL!	#NULL!	#NULL!	#NULL!	#NULL!	#NULL!	#NULL!	#NULL!	#NULL!	#NULL!
1560	18	7	2	2	8/21/2014 10:51:17 AM	1	1	0	3	2	4	4	2	5	2	2	4	4	4	4	5	2	4	4	4	4	2	4	3	5	4	5	2	3	4	1	5	1	2	4	1	4	2	3	3	4	3.83333	3.28571	3.8
1561	18	7	2	2	8/21/2014 11:49:19 AM	1	1	0	3	2	4	4	2	3	4	2	4	4	5	5	4	5	4	5	4	2	4	4	4	4	4	5	4	4	4	2	2	2	3	3	4	2	4	4	2	4	4.33333	4.28571	4.2
1562	18	7	2	2	8/21/2014 1:55:40 PM	1	1	0	#NULL!	#NULL!	#NULL!	#NULL!	#NULL!	#NULL!	4	2	4	4	4	4	4	4	4	3	2	2	4	4	4	#NULL!	#NULL!	5	#NULL!	#NULL!	4	4	5	4	4	5	3	4	#NULL!	4	4	5	4	3.57143	5
1563	18	7	2	2	8/22/2014 4:22:49 PM	1	1	0	#NULL!	#NULL!	#NULL!	#NULL!	#NULL!	#NULL!	#NULL!	#NULL!	#NULL!	#NULL!	#NULL!	#NULL!	#NULL!	#NULL!	#NULL!	#NULL!	#NULL!	#NULL!	#NULL!	#NULL!	#NULL!	#NULL!	#NULL!	#NULL!	#NULL!	#NULL!	#NULL!	#NULL!	#NULL!	#NULL!	#NULL!	#NULL!	#NULL!	#NULL!	#NULL!	#NULL!	#NULL!	#NULL!	#NULL!	#NULL!	#NULL!
1564	18	7	2	2	8/26/2014 10:00:28 AM	1	1	0	#NULL!	#NULL!	#NULL!	#NULL!	#NULL!	#NULL!	4	3	3	2	2	3	2	3	2	5	4	4	2	4	2	#NULL!	#NULL!	3	#NULL!	#NULL!	3	3	3	3	2	2	1	2	#NULL!	2	3	3	2.66667	3.14286	3
1565	18	7	2	2	8/26/2014 12:06:34 PM	1	1	0	3	2	4	4	2	4	4	2	4	2	3	4	4	3	3	4	4	1	5	5	3	4	2	4	4	3	3	4	2	2	2	4	2	3	4	4	4	4	3.5	3.85714	3.4
1566	18	7	2	2	8/26/2014 4:04:32 PM	1	1	0	3	2	4	4	2	3	4	4	2	3	2	4	3	3	4	2	4	2	4	4	4	4	2	4	3	4	2	4	2	2	4	3	3	4	2	4	2	4	3	3.57143	3.4
1567	18	7	2	2	8/27/2014 1:44:47 PM	1	1	0	#NULL!	#NULL!	#NULL!	#NULL!	#NULL!	#NULL!	#NULL!	#NULL!	#NULL!	#NULL!	#NULL!	#NULL!	#NULL!	#NULL!	#NULL!	#NULL!	#NULL!	#NULL!	#NULL!	#NULL!	#NULL!	#NULL!	#NULL!	#NULL!	#NULL!	#NULL!	#NULL!	#NULL!	#NULL!	#NULL!	#NULL!	#NULL!	#NULL!	#NULL!	#NULL!	#NULL!	#NULL!	#NULL!	#NULL!	#NULL!	#NULL!
1568	18	7	2	2	8/27/2014 2:33:53 PM	1	1	0	3	2	3	4	2	4	4	2	4	3	3	4	2	4	3	4	2	2	4	4	2	4	3	4	4	4	4	2	2	2	4	4	4	2	4	3	3	3	3.33333	3.28571	3.8
1569	18	7	2	2	8/28/2014 1:15:01 AM	1	1	0	4	#NULL!	3	4	2	3	4	3	3	2	2	5	4	4	3	5	2	2	4	5	4	4	1	4	4	4	5	2	4	4	1	3	3	2	4	3	3	3	3.33333	3.85714	3.4
1570	18	7	2	2	8/28/2014 1:16:13 AM	1	1	0	4	#NULL!	2	2	2	4	4	3	3	2	2	5	3	4	3	4	4	2	4	4	4	5	1	3	4	5	5	2	4	5	1	2	2	2	4	3	3	3	3.16667	3.85714	3.6
1571	18	7	2	2	8/28/2014 8:15:09 AM	1	1	0	3	2	2	2	2	2	4	4	2	2	3	4	4	4	4	4	4	3	3	4	3	4	2	4	4	4	2	2	2	2	2	4	3	4	2	4	4	4	3.16667	3.71429	3.6
1572	18	7	2	2	8/28/2014 8:56:53 AM	1	1	0	3	2	2	2	2	3	2	4	2	2	4	4	2	4	3	2	4	2	4	4	2	4	2	4	3	2	5	2	4	2	3	4	2	2	2	3	3	4	2.66667	3.28571	3
1573	18	7	2	2	8/28/2014 3:28:01 PM	1	1	0	3	2	2	3	2	3	4	2	4	3	3	4	3	4	3	4	4	3	3	4	3	3	3	4	3	4	2	2	2	2	3	4	3	2	4	3	3	3	3.5	3.57143	3.4
1575	18	7	2	2	41707.04042824074	1	1	0	3	2	3	3	2	3	5	2	4	3	3	2	4	2	3	3	3	2	4	3	3	4	3	4	4	4	3	2	3	2	3	4	3	3	2	4	3	4	3.5	3	3.8
1576	18	7	2	2	41707.112233796295	1	1	0	3	2	4	4	2	4	4	2	4	4	4	4	4	4	4	4	4	2	4	4	4	3	2	4	3	4	4	2	2	4	4	4	2	4	2	4	2	4	4	4	3.2
1577	18	7	2	2	41768.670266203706	1	1	0	3	2	4	4	2	5	3	3	3	3	3	4	3	4	3	4	3	3	3	4	3	4	1	4	4	3	4	3	3	1	4	3	3	1	5	3	4	4	3.16667	3.42857	3.2
1578	18	7	2	2	41891.330752314818	1	1	0	3	2	4	4	2	4	4	2	4	2	4	4	3	3	4	2	3	2	4	4	4	4	1	3	3	3	4	4	2	2	3	4	1	3	2	4	4	4	3.5	3.42857	2.8
1579	18	7	2	2	41891.429131944446	1	1	0	3	2	2	2	1	3	3	1	5	4	4	4	4	4	5	4	5	1	5	5	4	5	4	5	4	4	2	2	2	3	4	5	5	3	4	5	2	5	4	4.57143	4.4
1580	18	7	2	2	41891.66815972222	1	1	0	3	2	3	3	2	4	2	4	2	2	3	2	2	2	3	2	4	4	2	2	2	4	2	2	2	2	4	4	4	2	1	2	1	2	1	2	2	2	2.16667	2.42857	2.4
1581	18	7	2	2	41921.375590277778	1	1	0	3	2	2	3	2	2	4	2	4	4	5	4	4	4	3	2	4	2	4	3	3	5	3	5	4	4	3	3	3	2	2	4	3	2	2	4	4	4	4.16667	3.28571	4.2
1582	18	7	2	2	41921.952199074076	1	1	0	1	1	2	2	1	3	4	4	2	4	4	4	3	4	4	4	3	3	3	3	3	4	2	4	3	1	3	4	2	2	4	4	3	4	2	3	4	3	3.5	3.42857	2.8
1583	18	7	2	2	9/21/2014 1:05:23 AM	1	1	0	1	1	2	2	1	2	5	3	3	4	5	5	5	3	2	4	3	1	5	4	3	5	1	4	3	4	4	2	1	1	1	5	1	1	2	1	4	5	4.5	3.42857	3.4
1584	19	9	2	2	10/30/2014 10:30:40 AM	1	1	0	3	2	3	4	2	5	4	2	4	3	2	5	4	5	5	4	5	1	5	3	4	5	1	5	3	4	5	1	1	2	3	2	2	1	1	3	5	1	3.66667	4.42857	3.6
1585	19	9	2	2	10/30/2014 10:52:55 AM	1	1	0	2	1	4	4	1	5	5	1	5	4	5	5	4	5	2	5	4	2	4	5	3	5	3	3	2	4	5	5	5	5	1	3	1	1	5	5	5	5	4.66667	4	3.4
1586	19	9	2	2	10/30/2014 12:07:30 PM	1	1	0	3	2	4	4	2	3	3	2	4	2	2	4	4	4	3	4	4	2	4	2	3	3	2	3	3	4	4	2	4	4	2	2	2	2	2	3	2	4	3.16667	3.42857	3
1587	19	9	2	2	10/30/2014 12:19:07 PM	1	1	0	3	2	2	2	2	4	3	4	2	1	3	1	2	3	2	5	2	5	1	1	2	2	1	1	2	1	5	5	5	1	1	5	1	3	5	1	2	1	2	2.28571	1.4
1588	19	9	2	2	10/30/2014 1:09:23 PM	1	1	0	3	2	3	3	2	5	4	3	3	3	3	4	4	4	4	4	3	3	3	4	4	4	2	4	3	3	4	4	5	4	3	3	2	2	4	3	4	4	3.5	3.71429	3.2
1589	19	9	2	2	10/30/2014 2:27:27 PM	1	1	0	3	2	2	2	1	2	3	2	4	3	3	4	3	4	3	4	4	3	3	2	4	5	2	4	4	3	4	4	2	3	4	3	2	3	2	4	3	4	3.33333	3.42857	3.6
1590	19	9	2	2	41650.818645833337	1	1	0	3	2	2	2	1	5	4	3	3	3	4	4	4	4	3	4	4	3	3	4	3	3	2	3	3	4	3	3	3	2	2	2	2	2	4	3	3	3	3.66667	3.57143	3
1591	19	9	2	2	41709.396481481483	1	1	0	2	1	3	3	1	3	4	3	3	3	4	4	5	4	2	2	3	3	3	3	4	4	4	4	4	4	4	4	4	3	2	2	2	2	1	3	3	4	3.83333	3	4
1592	19	9	2	2	41709.573888888888	1	1	0	3	2	4	4	1	5	3	1	5	3	4	5	4	5	4	4	4	1	5	4	4	5	4	5	4	4	5	4	4	4	3	5	3	4	5	3	4	4	4	4.28571	4.4
1593	19	9	2	2	41709.579988425925	1	1	0	3	2	3	3	2	3	2	4	2	2	1	2	2	3	2	1	3	2	4	5	2	3	1	3	3	4	3	2	3	3	2	3	2	1	2	3	4	4	1.83333	2.85714	2.8
1594	19	9	2	2	41709.605266203704	1	1	0	3	2	3	3	2	4	3	5	1	1	3	3	4	4	3	3	3	5	1	4	3	3	1	2	3	3	5	3	4	4	3	3	2	2	4	2	4	3	2.5	3	2.4
1595	19	9	2	2	41709.607939814814	1	1	0	3	2	4	4	2	4	2	5	1	1	4	4	4	3	2	4	3	4	2	3	2	3	2	3	3	2	4	3	2	2	2	3	2	1	2	3	2	2	2.66667	2.71429	2.6
1596	19	9	2	2	41709.611400462964	1	1	0	3	2	3	3	2	3	2	4	2	4	4	4	4	4	3	5	4	4	2	3	4	4	2	4	2	4	4	2	2	2	2	2	2	2	4	2	4	4	3.33333	3.57143	3.2
1597	19	9	2	2	41709.624502314815	1	1	0	4	#NULL!	4	4	2	4	3	2	4	4	3	4	4	4	4	4	4	1	5	5	3	4	4	4	4	4	1	1	1	2	3	3	3	2	3	4	2	4	3.66667	4.14286	4
1598	19	9	2	2	41709.632118055553	1	1	0	4	#NULL!	4	4	2	3	3	3	3	3	3	4	3	4	4	4	2	2	4	4	4	4	3	4	4	2	2	4	4	3	3	3	3	2	4	4	3	5	3.16667	3.71429	3.4
1599	19	9	2	2	41709.633437500001	1	1	0	3	2	2	4	2	5	3	2	4	4	3	4	4	4	3	4	2	5	1	3	2	4	3	3	5	3	4	3	4	4	1	4	1	3	3	2	3	3	3.66667	2.71429	3.6
1600	19	9	2	2	41709.633564814816	1	1	0	3	2	3	3	2	4	2	3	3	1	4	4	4	4	4	4	4	5	1	2	2	4	2	2	1	2	5	5	5	5	1	1	1	1	3	3	3	4	3	3	2.2
1601	19	9	2	2	41709.6797337963	1	1	0	4	#NULL!	2	3	2	3	1	5	1	1	1	4	1	4	1	4	4	5	1	1	1	2	1	3	1	1	5	4	5	5	3	3	1	1	2	1	1	1	1.5	2.28571	1.6
1602	19	9	2	2	41709.764907407407	1	1	0	3	2	4	4	2	4	4	5	1	1	4	3	2	2	2	5	3	5	1	1	2	4	3	4	#NULL!	1	4	2	3	3	3	4	2	3	5	3	4	3	2.5	2.28571	3
1603	19	9	2	2	41709.914027777777	1	1	0	3	2	4	4	2	5	5	4	2	4	5	5	4	5	2	5	5	1	5	5	4	5	3	5	5	4	4	4	5	4	2	2	3	2	5	4	4	4	4.16667	4.42857	4.4
1604	19	9	2	2	41740.354050925926	1	1	0	3	2	2	2	2	2	4	3	3	3	4	4	3	4	3	3	3	3	3	3	3	5	2	3	4	3	5	3	5	3	2	4	3	1	1	3	4	4	3.5	3.14286	3.4
1605	19	9	2	2	41740.355787037035	1	1	0	3	2	2	2	2	2	4	2	4	2	4	3	4	3	3	2	2	3	3	3	2	2	1	3	2	2	2	2	3	2	2	3	2	2	2	2	3	2	3.5	2.57143	2
1606	19	9	2	2	41740.392731481479	1	1	0	4	#NULL!	3	3	1	3	3	3	3	3	3	3	3	3	3	3	3	3	3	3	3	4	3	4	4	3	3	3	3	3	3	3	3	3	4	3	3	3	3	3	3.6
1607	19	9	2	2	41740.412731481483	1	1	0	4	#NULL!	4	4	2	4	3	3	3	4	3	5	3	4	3	4	4	2	4	3	4	4	4	4	4	5	2	3	2	3	3	3	3	4	4	3	3	3	3.5	3.71429	4.2
1608	19	9	2	2	41740.41642361111	1	1	0	4	#NULL!	3	3	1	3	3	3	3	2	3	3	2	5	3	3	3	3	3	3	3	4	3	5	4	1	5	3	3	3	3	3	1	3	3	4	4	3	2.66667	3.28571	3.4
1609	19	9	2	2	41740.458819444444	1	1	0	4	#NULL!	3	3	2	3	3	3	3	2	3	4	3	2	3	3	3	2	4	2	2	4	3	3	3	2	2	4	4	3	3	3	2	3	4	3	3	3	3	2.71429	3
1610	19	9	2	2	41740.638287037036	1	1	0	3	2	4	4	2	5	3	3	3	3	3	4	4	3	4	4	4	2	4	3	4	4	3	3	3	3	2	2	2	3	2	4	3	2	2	3	3	3	3.33333	3.71429	3.2
1611	19	9	2	2	41740.802245370367	1	1	0	4	#NULL!	#NULL!	#NULL!	#NULL!	#NULL!	3	3	3	2	3	4	2	3	2	4	2	4	2	3	1	3	2	3	3	2	4	3	4	3	1	3	2	2	2	2	3	2	2.83333	2.42857	2.6
1612	19	9	2	2	41770.330405092594	1	1	0	3	2	2	4	2	3	3	3	3	2	4	3	4	3	2	4	2	3	3	2	2	2	1	2	2	2	4	3	3	3	1	1	2	1	3	2	2	2	3.16667	2.57143	1.8
1613	19	9	2	2	41770.333796296298	1	1	0	4	#NULL!	4	4	2	5	#NULL!	4	2	2	#NULL!	2	4	4	4	1	2	5	1	5	2	4	2	4	4	1	2	4	4	#NULL!	1	2	1	2	2	4	#NULL!	4	2.5	2.71429	3
1614	19	9	2	2	41770.398761574077	1	1	0	3	2	2	2	2	2	3	5	1	1	3	2	2	2	1	2	3	4	2	4	2	1	1	1	1	1	5	3	3	3	1	2	1	1	3	4	3	4	2	2.28571	1
1615	19	9	2	2	41770.486516203702	1	1	0	3	2	2	3	2	2	4	4	2	4	2	4	2	5	2	4	4	2	4	5	4	4	2	4	4	4	4	3	4	3	1	3	2	1	2	2	2	4	3	4	3.6
1616	19	9	2	2	41770.64603009259	1	1	0	4	#NULL!	3	3	2	3	3	4	2	1	3	3	3	3	2	3	3	4	2	2	2	2	1	3	2	2	5	2	2	5	3	2	2	2	2	3	2	3	2.5	2.42857	2
1617	19	9	2	2	41770.651423611111	1	1	0	3	2	4	4	2	5	4	2	4	4	3	5	4	5	4	4	5	2	4	5	4	5	5	5	5	5	1	1	1	1	1	4	3	3	4	4	4	4	4	4.42857	5
1618	19	9	2	2	41770.81486111111	1	1	0	4	#NULL!	4	4	2	4	#NULL!	2	4	4	#NULL!	5	#NULL!	5	#NULL!	4	5	1	5	#NULL!	4	5	4	5	5	5	5	5	5	#NULL!	#NULL!	#NULL!	#NULL!	3	4	#NULL!	#NULL!	5	4.33333	4.6	4.8
1619	19	9	2	2	41770.920844907407	1	1	0	2	1	4	4	1	4	5	3	3	4	4	5	5	5	4	4	3	4	2	3	4	4	3	3	4	2	4	3	4	4	2	2	2	2	1	2	4	3	4.33333	3.57143	3.2
1620	19	9	2	2	41801.384479166663	1	1	0	4	#NULL!	3	4	2	4	#NULL!	2	4	2	#NULL!	#NULL!	#NULL!	2	2	4	4	4	2	4	#NULL!	4	1	4	4	2	4	2	2	#NULL!	#NULL!	#NULL!	#NULL!	2	2	2	#NULL!	4	3	3	3
1621	19	9	2	2	41801.432881944442	1	1	0	4	#NULL!	4	4	1	4	4	1	5	4	4	5	4	4	4	5	5	1	5	5	4	5	3	4	5	5	4	4	4	4	4	4	4	4	5	5	3	5	4.33333	4.57143	4.4
1622	19	9	2	2	41801.433587962965	1	1	0	4	#NULL!	2	4	1	5	4	4	2	2	3	1	4	3	2	4	5	1	5	4	4	4	4	4	4	4	2	2	1	2	2	3	2	2	2	4	3	4	2.66667	3.85714	4
1623	19	9	2	2	41801.43472222222	1	1	0	4	#NULL!	4	4	1	4	3	3	3	5	3	5	3	5	3	3	5	5	1	3	3	5	5	1	4	3	1	1	1	3	4	3	5	5	5	5	3	5	3.66667	3.28571	3.6
1624	19	9	2	2	41801.439340277779	1	1	0	4	#NULL!	3	3	2	3	3	1	5	5	3	5	3	4	#NULL!	5	5	1	5	4	5	4	4	4	4	5	2	2	3	3	3	3	3	4	4	3	3	5	4	4.66667	4.2
1625	19	9	2	2	41801.44054398148	1	1	0	4	#NULL!	1	1	1	4	3	3	3	3	3	5	3	3	5	3	5	1	5	3	5	5	5	5	5	5	2	2	1	2	3	5	3	5	5	5	3	5	3.33333	4.14286	5
1626	19	9	2	2	41801.457384259258	1	1	0	3	2	4	4	2	4	3	2	4	2	3	4	2	3	1	3	3	5	1	2	2	2	1	2	2	1	4	4	4	4	1	2	1	1	3	3	1	1	3	2.14286	1.6
1627	19	9	2	2	41801.473854166667	1	1	0	3	2	3	3	2	2	4	2	4	3	4	4	4	5	3	3	2	1	5	5	3	4	1	1	1	2	4	2	2	2	1	3	2	1	1	3	2	4	3.83333	3.71429	1.8
1628	19	9	2	2	41801.474166666667	1	1	0	3	2	3	3	2	3	4	2	4	3	3	5	4	3	4	2	3	1	5	5	3	2	2	2	2	5	4	2	4	3	1	2	2	1	1	5	3	5	3.83333	3.57143	2.6
1629	19	9	2	2	41801.555138888885	1	1	0	3	2	4	4	2	5	4	2	4	3	3	4	3	3	3	4	3	3	3	3	3	3	1	3	3	3	5	3	3	3	3	3	3	2	1	3	3	4	3.5	3.14286	2.6
1630	19	9	2	2	41801.559733796297	1	1	0	3	2	4	4	2	3	3	4	2	1	2	3	2	3	2	2	3	2	4	3	2	1	1	2	1	1	2	1	2	1	1	3	1	1	1	4	3	4	2.16667	2.71429	1.2
1631	19	9	2	2	41801.568564814814	1	1	0	3	2	2	2	2	3	3	2	4	4	4	4	3	4	3	4	4	2	4	4	4	3	1	3	2	2	2	4	3	4	2	3	3	2	1	3	4	4	3.66667	3.85714	2.2
1632	19	9	2	2	41801.569594907407	1	1	0	3	2	4	4	2	3	2	3	3	3	3	4	4	4	3	3	4	3	3	3	3	4	3	4	4	3	2	4	2	2	2	3	2	3	4	3	4	4	3.16667	3.28571	3.6
1633	19	9	2	2	41801.631423611114	1	1	0	2	1	4	4	2	5	4	2	4	3	4	5	5	5	3	2	3	2	4	4	4	2	3	3	2	4	4	4	3	4	3	3	3	3	2	4	4	4	4.16667	3.57143	2.8
1634	19	9	2	2	41831.43787037037	1	1	0	4	#NULL!	4	4	2	5	3	3	3	5	3	5	3	3	3	3	4	1	5	3	1	5	4	5	5	4	1	1	2	3	3	3	3	4	5	5	3	5	3.66667	3.14286	4.6
1635	19	9	2	2	41831.43787037037	1	1	0	4	#NULL!	3	3	2	4	3	3	3	4	3	5	3	3	3	3	4	1	5	3	1	5	4	5	5	4	1	1	2	3	3	3	3	4	5	5	3	5	3.5	3.14286	4.6
1636	19	9	2	2	41831.53634259259	1	1	0	3	2	4	4	2	3	4	2	4	2	4	4	5	4	4	2	4	2	4	4	2	2	1	2	1	2	4	4	2	4	2	4	2	1	1	2	4	2	3.83333	3.42857	1.6
1637	19	9	2	2	41831.66510416667	1	1	0	4	#NULL!	2	2	2	4	3	3	3	5	3	5	3	5	3	5	5	1	5	4	5	5	5	5	5	5	5	5	4	3	3	5	3	5	3	5	3	4	3.66667	4.57143	5
1638	19	9	2	2	41893.573900462965	1	1	0	3	2	2	2	2	2	4	2	4	3	4	4	4	2	3	2	3	4	2	2	2	4	2	4	2	4	4	4	2	4	2	3	2	1	2	4	3	2	3.83333	2.28571	3.2
1639	19	9	2	2	41893.575115740743	1	1	0	3	2	4	#NULL!	2	5	4	2	4	2	4	4	3	4	3	1	4	4	2	2	1	4	3	4	4	4	5	4	2	4	3	4	3	3	4	4	2	4	3.5	2.42857	3.8
1641	19	9	2	2	41923.51798611111	1	1	0	3	2	2	2	1	3	4	2	4	3	3	4	4	4	4	4	3	3	3	4	3	4	4	4	4	4	4	2	4	5	2	2	1	2	4	4	4	4	3.66667	3.57143	4
1645	19	9	2	2	41954.344050925924	1	1	0	3	2	4	4	2	3	4	4	2	3	3	4	2	4	2	2	4	2	4	4	3	2	2	3	2	4	5	4	4	2	2	4	1	2	1	3	3	2	3	3.28571	2.6
1649	19	9	2	2	41984.429270833331	1	1	0	4	#NULL!	4	4	1	5	#NULL!	1	5	5	#NULL!	5	#NULL!	5	#NULL!	5	5	1	5	4	5	5	4	5	5	5	3	3	3	#NULL!	4	#NULL!	3	5	4	5	#NULL!	5	5	4.83333	4.8
1651	19	9	2	2	41984.465057870373	1	1	0	#NULL!	#NULL!	#NULL!	#NULL!	#NULL!	#NULL!	5	3	3	3	2	4	2	4	3	4	2	3	3	3	3	#NULL!	#NULL!	3	#NULL!	#NULL!	3	3	3	2	3	2	2	1	#NULL!	2	2	4	3.16667	3.14286	3
1652	19	9	2	2	41984.475613425922	1	1	0	3	2	1	1	1	2	4	2	4	4	4	4	4	3	3	1	5	2	4	2	3	4	3	3	3	4	2	2	2	2	2	3	2	1	2	3	4	2	4	3	3.4
1653	19	9	2	2	41984.569548611114	1	1	0	3	2	2	4	2	5	1	5	1	1	2	3	3	1	1	2	2	5	1	2	1	3	1	3	1	2	5	3	5	3	2	4	2	2	3	2	3	3	1.83333	1.42857	2
1654	19	9	2	2	41984.576284722221	1	1	0	3	2	1	1	1	5	4	1	5	4	4	4	4	5	4	1	4	3	3	4	3	2	4	4	3	2	4	4	4	5	3	3	3	3	4	3	4	3	4.16667	3.42857	3
1655	19	9	2	2	11/13/2014 9:39:45 AM	1	1	0	3	2	4	4	2	4	4	3	3	3	5	5	5	5	4	4	3	3	3	3	4	5	4	4	4	4	1	2	2	2	1	2	1	1	5	2	3	2	4.16667	3.71429	4.2
1656	19	9	2	2	11/13/2014 9:40:00 AM	1	1	0	3	2	4	4	2	5	3	3	3	2	3	4	4	4	3	4	3	4	2	3	2	4	2	3	3	4	2	2	2	2	2	3	3	3	3	3	3	4	3.16667	3	3.2
1657	19	9	2	2	11/13/2014 9:45:15 AM	1	1	0	3	2	3	3	2	4	4	2	4	2	3	4	2	4	3	2	2	4	2	3	2	5	2	4	4	4	4	2	5	4	2	5	2	2	3	4	4	2	3.16667	2.57143	3.8
1658	19	9	2	2	11/13/2014 10:55:53 AM	1	1	0	2	1	4	4	1	5	4	2	4	3	3	3	4	4	3	5	3	2	4	2	3	3	1	3	2	2	3	5	4	2	1	3	2	1	4	3	3	3	3.5	3.42857	2.2
1661	19	9	2	2	11/13/2014 12:59:57 PM	1	1	0	3	2	2	3	2	2	3	2	4	3	4	4	4	4	2	4	4	3	3	3	4	3	2	2	2	2	4	2	3	3	2	3	3	1	2	2	4	4	3.66667	3.42857	2.2
1662	19	9	2	2	11/13/2014 1:01:40 PM	1	1	0	3	2	3	3	2	2	3	4	2	2	3	3	4	3	2	2	2	3	3	3	3	4	3	4	2	3	3	#NULL!	2	1	2	5	1	1	3	3	4	2	2.83333	2.57143	3.2
1663	19	9	2	2	11/13/2014 1:11:30 PM	1	1	0	3	2	2	2	2	2	3	2	4	3	3	4	4	4	3	3	4	4	2	2	3	4	3	4	3	4	3	2	2	1	2	3	3	1	1	4	3	4	3.5	3	3.6
1664	19	9	2	2	11/13/2014 1:26:01 PM	1	1	0	3	2	2	3	2	3	#NULL!	#NULL!	#NULL!	#NULL!	#NULL!	#NULL!	#NULL!	#NULL!	#NULL!	#NULL!	#NULL!	#NULL!	#NULL!	#NULL!	#NULL!	3	2	#NULL!	3	2	#NULL!	#NULL!	#NULL!	#NULL!	#NULL!	#NULL!	#NULL!	#NULL!	4	#NULL!	#NULL!	#NULL!	#NULL!	#NULL!	2.5
1666	19	9	2	2	11/13/2014 1:48:51 PM	1	1	0	3	2	1	1	2	5	3	4	2	4	4	3	3	3	4	4	3	3	3	3	3	4	3	4	3	3	4	2	3	4	3	3	3	2	3	3	4	3	3.16667	3.28571	3.4
1667	19	9	2	2	11/13/2014 1:53:51 PM	1	1	0	3	2	3	3	2	5	4	3	3	3	4	4	3	4	3	2	4	4	2	3	3	4	3	3	3	3	4	2	3	2	2	3	2	2	2	4	4	4	3.5	3	3.2
1668	19	9	2	2	11/13/2014 2:03:26 PM	1	1	0	3	2	2	3	2	2	4	4	2	2	4	4	4	4	4	4	4	4	2	4	2	4	1	4	4	3	2	2	4	4	2	3	2	2	4	4	4	4	3.33333	3.42857	3.2
1669	19	9	2	2	11/13/2014 2:06:20 PM	1	1	0	3	2	4	4	1	4	4	2	4	3	3	4	4	4	4	2	2	2	4	3	3	4	3	4	3	4	3	4	3	4	4	5	3	3	2	4	2	4	3.66667	3.14286	3.6
1670	19	9	2	2	11/13/2014 3:28:22 PM	1	1	0	3	2	2	2	2	2	3	2	4	3	4	5	2	4	3	5	3	4	2	5	4	4	3	4	4	2	4	2	4	4	1	5	1	2	4	4	4	4	3.5	3.71429	3.4
1671	19	9	2	2	11/13/2014 3:32:02 PM	1	1	0	4	#NULL!	4	4	1	4	5	1	5	2	2	4	1	3	4	4	4	2	4	4	2	3	2	2	2	4	5	3	4	4	4	4	4	2	1	4	2	5	3.16667	3.57143	2.6
1672	19	9	2	2	11/13/2014 3:47:12 PM	1	1	0	3	2	2	2	2	2	2	2	4	4	4	5	4	4	4	4	4	2	4	3	4	5	4	4	4	4	3	4	4	2	3	4	3	4	2	4	4	5	3.83333	3.85714	4.2
1673	19	9	2	2	11/13/2014 4:07:42 PM	1	1	0	3	2	2	2	2	4	1	2	4	1	1	5	1	1	1	4	2	2	4	1	3	4	1	1	1	2	2	2	2	2	1	5	2	2	4	3	2	4	2.16667	2.28571	1.8
1674	19	9	2	2	11/13/2014 4:19:59 PM	1	1	0	3	2	2	2	2	3	4	5	1	4	4	4	4	5	4	4	4	2	4	4	4	4	3	3	4	4	5	3	5	4	1	4	1	1	2	2	4	2	3.5	4.14286	3.6
1675	19	9	2	2	11/13/2014 4:21:03 PM	1	1	0	3	2	2	2	2	3	4	4	2	2	2	4	4	4	1	2	1	2	4	2	2	5	5	4	4	5	2	4	4	5	2	5	1	2	4	2	2	4	3	2.28571	4.6
1676	19	9	2	2	11/13/2014 4:22:01 PM	1	1	0	3	2	1	1	2	4	3	3	3	4	3	3	4	3	3	4	4	3	3	3	3	4	4	3	4	3	3	3	3	3	3	3	3	3	3	4	3	3	3.33333	3.28571	3.6
1677	19	9	2	2	11/13/2014 4:30:09 PM	1	1	0	3	2	3	3	2	2	4	4	2	2	2	4	2	2	1	4	3	3	3	4	2	4	4	2	2	1	4	4	4	1	3	4	2	2	4	4	3	4	2.66667	2.71429	2.6
1678	19	9	2	2	11/14/2014 10:23:52 AM	1	1	0	3	2	2	2	1	5	5	2	4	2	2	4	4	4	4	4	3	2	4	5	4	4	3	4	4	3	5	5	5	4	4	4	2	4	2	4	4	4	3.5	4	3.6
1679	19	9	2	2	11/14/2014 10:53:51 AM	1	1	0	3	2	3	3	2	4	2	2	4	4	4	4	2	5	4	5	3	2	4	3	1	5	1	4	4	4	4	5	2	2	1	5	2	1	5	5	2	5	3.33333	3.57143	3.6
1680	19	9	2	2	11/14/2014 11:11:18 AM	1	1	0	3	2	4	4	1	5	3	2	4	4	3	4	4	5	3	4	2	2	4	3	4	4	3	5	3	4	2	2	2	3	2	3	3	3	4	4	3	2	3.66667	3.57143	3.8
1681	19	9	2	2	11/14/2014 12:41:05 PM	1	1	0	2	1	2	2	1	3	5	1	5	4	5	5	5	5	5	3	4	1	5	5	4	5	4	4	5	5	3	3	4	3	1	5	1	1	4	4	2	5	4.83333	4.42857	4.6
1682	19	9	2	2	11/14/2014 1:40:01 PM	1	1	0	4	#NULL!	2	2	2	3	2	4	2	2	3	4	2	3	2	1	2	4	2	2	2	4	2	4	4	2	5	4	5	4	2	2	1	1	4	1	3	1	2.5	2	3.2
1688	19	9	2	2	11/14/2014 7:16:24 PM	1	1	0	#NULL!	#NULL!	#NULL!	#NULL!	#NULL!	#NULL!	4	4	2	3	4	3	2	4	3	2	4	3	3	3	2	#NULL!	#NULL!	4	#NULL!	#NULL!	4	4	4	4	1	1	2	1	#NULL!	2	4	3	3	3	4
1691	19	9	2	2	11/17/2014 10:36:31 AM	1	1	0	3	2	4	4	2	4	4	2	4	2	3	4	3	4	3	3	3	4	2	3	2	3	3	3	2	3	4	4	4	4	2	3	2	2	2	3	2	4	3.33333	2.85714	2.8
1695	19	9	2	2	11/18/2014 11:05:44 AM	1	1	0	4	#NULL!	3	4	1	4	3	4	2	3	#NULL!	3	2	2	#NULL!	2	#NULL!	5	1	4	2	5	#NULL!	#NULL!	#NULL!	#NULL!	5	5	5	#NULL!	1	#NULL!	2	2	1	2	#NULL!	#NULL!	2.6	2.2	5
1696	19	9	2	2	11/19/2014 8:57:31 AM	1	1	0	4	#NULL!	3	3	2	3	2	2	4	2	2	1	2	2	1	3	2	3	3	2	1	1	2	2	1	2	4	4	4	3	3	3	2	2	3	2	3	2	2.16667	2	1.6
1697	19	9	2	2	11/19/2014 3:52:36 PM	1	1	0	3	2	2	2	2	5	4	3	3	3	4	4	3	3	3	4	3	4	2	4	3	4	3	4	4	3	4	3	3	3	3	3	3	3	3	3	4	2	3.5	3.14286	3.6
1698	19	9	2	2	11/20/2014 8:17:05 AM	1	1	0	3	2	1	1	2	3	3	2	4	3	3	4	3	3	3	3	4	2	4	4	3	4	2	3	2	4	2	2	3	4	3	3	3	2	4	3	3	3	3.33333	3.42857	3
1699	19	9	2	2	11/20/2014 8:25:34 AM	1	1	0	3	2	2	2	2	3	2	4	2	2	2	4	1	3	2	2	3	2	4	4	3	4	1	3	1	1	4	5	2	2	2	2	2	1	1	1	2	1	2.16667	3	2
1700	19	9	2	2	11/20/2014 11:09:17 AM	1	1	0	3	2	3	3	2	3	3	1	5	3	4	4	4	4	4	2	4	4	2	5	2	2	1	3	2	2	4	4	4	3	1	3	3	1	2	4	3	4	3.83333	3.28571	2
1701	19	9	2	2	11/20/2014 11:20:28 AM	1	1	0	3	2	2	2	1	2	3	4	2	2	3	3	4	2	1	4	3	4	2	2	2	4	3	3	2	3	4	4	4	3	2	2	1	2	3	3	3	3	2.83333	2.28571	3
1702	19	9	2	2	11/20/2014 11:29:47 AM	1	1	0	3	2	2	2	2	2	2	2	4	2	1	3	1	3	3	2	3	2	4	4	1	2	1	3	2	1	4	2	5	3	3	3	2	2	2	4	4	4	2.16667	2.85714	1.8
1703	19	9	2	2	11/23/2014 8:19:17 PM	1	1	0	3	2	4	4	2	3	1	2	4	1	1	2	1	1	1	2	2	5	1	2	1	3	1	2	1	2	5	4	1	2	1	1	1	1	3	1	2	1	1.66667	1.42857	1.8
1704	19	9	2	2	11/24/2014 9:12:26 AM	1	1	0	3	2	3	3	2	3	4	3	3	2	3	4	3	4	3	5	4	4	2	4	2	4	4	4	4	3	4	3	3	3	3	4	2	2	3	5	3	4	3.16667	3.42857	3.8
1705	19	9	2	2	11/24/2014 1:11:08 PM	1	1	0	#NULL!	#NULL!	#NULL!	#NULL!	#NULL!	#NULL!	#NULL!	#NULL!	#NULL!	#NULL!	#NULL!	#NULL!	#NULL!	#NULL!	#NULL!	#NULL!	#NULL!	#NULL!	#NULL!	#NULL!	#NULL!	#NULL!	#NULL!	#NULL!	#NULL!	#NULL!	#NULL!	#NULL!	#NULL!	#NULL!	#NULL!	#NULL!	#NULL!	#NULL!	#NULL!	#NULL!	#NULL!	#NULL!	#NULL!	#NULL!	#NULL!
1707	19	9	2	2	11/24/2014 1:52:22 PM	1	1	0	3	2	2	2	2	2	4	2	4	3	2	4	3	4	3	3	4	3	3	4	3	4	3	3	3	3	3	3	4	4	2	2	3	1	2	3	2	4	3.33333	3.42857	3.2
1708	19	9	2	2	11/24/2014 3:34:45 PM	1	1	0	3	2	3	3	2	2	4	2	4	3	4	5	3	3	4	3	3	3	3	4	4	4	1	4	3	5	3	2	2	3	3	3	3	1	2	3	3	4	3.83333	3.42857	3.4
1709	19	9	2	2	11/25/2014 8:22:11 AM	1	1	0	3	2	4	4	2	5	3	2	4	3	3	4	2	4	3	4	2	2	4	4	3	3	2	3	3	3	5	5	3	3	3	5	4	1	2	3	2	3	3.16667	3.42857	2.8
1710	19	9	2	2	11/25/2014 8:43:42 AM	1	1	0	3	2	3	3	2	4	4	2	4	2	3	3	4	2	2	4	4	3	3	3	3	4	3	3	4	2	4	4	4	4	2	3	2	2	3	4	4	2	3.33333	3	3.2
1711	19	9	2	2	11/25/2014 8:50:06 AM	1	1	0	3	2	3	3	2	5	4	1	5	5	4	4	5	5	3	1	4	2	4	2	3	3	3	3	3	4	4	2	4	4	3	5	2	3	4	3	3	3	4.5	3.14286	3.2
1712	19	9	2	2	11/25/2014 9:10:03 AM	1	1	0	4	#NULL!	4	4	2	5	4	2	4	4	4	4	4	5	3	5	3	2	4	4	3	3	2	3	3	4	4	2	4	4	2	2	2	2	2	2	4	4	4	3.85714	3
1713	19	9	2	2	11/25/2014 10:04:39 AM	1	1	0	3	2	3	3	2	3	4	1	5	3	4	4	2	5	3	4	2	3	3	2	2	4	4	5	3	4	4	2	2	4	2	4	2	2	2	2	2	4	3.66667	3	4
1714	19	9	2	2	11/25/2014 11:13:47 AM	1	1	0	3	2	4	4	1	4	3	3	3	2	3	4	4	4	4	3	2	2	4	2	3	4	1	2	1	1	2	2	2	2	1	4	1	2	3	4	4	5	3.16667	3.14286	1.8
1715	19	9	2	2	11/25/2014 11:27:21 AM	1	1	0	3	2	4	4	1	4	5	3	3	1	2	2	1	3	1	2	4	4	2	4	2	5	5	3	4	5	5	4	4	4	3	1	2	1	1	2	2	2	2.33333	2.57143	4.4
1716	19	9	2	2	11/25/2014 1:09:57 PM	1	1	0	3	2	4	4	2	4	3	2	4	3	3	4	3	4	3	3	4	4	2	3	2	3	2	3	1	2	2	3	3	3	2	2	2	2	2	3	3	4	3.33333	3	2.2
1717	18	7	2	2	11/25/2014 1:55:00 PM	1	1	0	#NULL!	#NULL!	#NULL!	#NULL!	#NULL!	#NULL!	3	3	3	3	3	3	3	3	3	3	3	3	3	3	3	#NULL!	#NULL!	3	#NULL!	#NULL!	3	3	3	3	3	3	2	3	#NULL!	2	2	2	3	3	3
1718	19	9	2	2	11/25/2014 1:57:25 PM	1	1	0	3	2	4	2	2	3	3	4	2	2	3	4	3	3	2	2	2	3	3	4	2	3	3	3	3	2	4	4	4	4	2	3	3	2	3	3	3	4	2.83333	2.57143	2.8
1719	19	9	2	2	11/25/2014 2:39:01 PM	1	1	0	3	2	3	#NULL!	2	2	4	4	2	4	2	3	4	5	2	4	1	2	4	4	2	4	4	4	4	5	2	2	2	2	1	3	1	1	2	2	2	2	3.16667	3.14286	4.2
1720	19	9	2	2	11/26/2014 3:35:02 PM	1	1	0	3	2	2	2	2	4	4	3	3	3	4	3	3	3	3	4	4	4	2	3	3	4	2	4	3	3	4	4	4	4	3	3	2	2	3	3	4	4	3.33333	3.14286	3.2
1721	19	9	2	2	11/27/2014 11:15:19 AM	1	1	0	3	2	2	2	2	2	3	4	2	3	3	4	4	#NULL!	3	4	3	3	3	4	3	4	3	4	4	4	4	3	3	2	4	4	3	2	3	2	4	2	3.16667	3.33333	3.8
1722	19	9	2	2	11/27/2014 12:52:59 PM	1	1	0	3	2	3	3	2	2	5	3	3	3	3	4	4	4	4	4	4	3	3	3	3	4	3	4	4	4	4	4	3	3	3	3	2	2	2	4	3	4	3.66667	3.57143	3.8
1723	19	9	2	2	11/27/2014 1:36:00 PM	1	1	0	4	#NULL!	4	#NULL!	2	5	3	3	3	3	3	2	3	4	3	3	2	4	2	3	4	3	3	3	3	2	4	4	4	#NULL!	3	3	2	2	4	3	#NULL!	3	2.83333	3	2.8
1724	19	9	2	2	11/27/2014 1:48:33 PM	1	1	0	4	#NULL!	4	4	2	5	4	3	3	2	3	3	3	4	3	3	2	2	4	3	4	4	2	2	4	1	3	4	2	3	3	2	3	2	3	3	3	3	3	3.28571	2.6
1725	19	9	2	2	11/27/2014 3:14:16 PM	1	1	0	3	2	2	2	2	2	3	2	4	3	3	3	4	4	2	3	5	2	4	3	3	4	2	4	4	2	5	4	4	1	2	4	3	3	2	4	4	3	3.33333	3.42857	3.2
1726	19	9	2	2	11/27/2014 3:24:14 PM	1	1	0	3	2	2	2	1	3	4	3	3	4	4	4	3	4	3	4	5	2	4	5	3	5	3	4	4	4	5	4	5	4	4	4	3	4	3	4	4	4	3.66667	4	4
1727	19	9	2	2	11/27/2014 3:34:28 PM	1	1	0	3	2	4	4	2	4	3	3	3	2	2	3	4	4	3	3	3	2	4	3	2	4	3	4	3	3	4	4	4	3	3	3	3	2	3	3	2	4	2.83333	3.14286	3.4
1728	19	9	2	2	11/27/2014 3:55:04 PM	1	1	0	#NULL!	#NULL!	#NULL!	#NULL!	#NULL!	#NULL!	3	2	4	3	3	3	1	2	3	4	4	3	3	2	2	#NULL!	#NULL!	2	#NULL!	#NULL!	5	4	2	4	2	3	1	1	#NULL!	3	3	3	2.83333	2.85714	2
1729	19	9	2	2	11/27/2014 7:13:07 PM	1	1	0	3	2	2	3	1	2	4	2	4	3	4	4	3	4	3	3	3	2	4	3	3	5	4	3	4	2	2	4	4	4	3	4	3	4	4	3	2	4	3.66667	3.28571	3.6
1730	19	9	2	2	11/28/2014 8:55:16 AM	1	1	0	3	2	3	3	2	4	4	#NULL!	#NULL!	3	2	4	3	3	3	4	4	2	4	5	3	3	3	4	3	2	5	1	3	4	3	3	3	2	2	4	3	2	3.2	3.71429	3
1731	19	9	2	2	11/28/2014 8:59:05 AM	1	1	0	4	#NULL!	2	3	2	3	3	4	2	1	2	4	2	1	2	4	1	4	2	2	4	2	1	4	2	1	5	5	5	5	3	3	1	3	4	3	3	3	2.33333	2.28571	2
1732	19	9	2	2	11/28/2014 9:09:58 AM	1	1	0	4	#NULL!	4	4	2	5	3	3	3	1	3	4	1	4	2	3	3	2	4	3	2	3	2	2	2	2	3	2	4	4	3	3	2	3	3	4	3	5	2.5	3	2.2
1733	19	9	2	2	11/28/2014 10:30:51 AM	1	1	0	4	#NULL!	3	3	1	3	#NULL!	#NULL!	#NULL!	3	#NULL!	4	#NULL!	3	#NULL!	3	2	3	3	#NULL!	4	4	4	4	4	3	4	2	3	4	3	#NULL!	3	2	3	3	#NULL!	3	3.5	3	3.8
1734	19	9	2	2	11/28/2014 10:34:03 AM	1	1	0	3	2	3	3	1	5	4	2	4	4	4	4	4	5	4	4	4	2	4	3	3	3	3	4	4	4	4	4	4	4	3	4	3	3	4	4	2	4	4	3.85714	3.6
1735	19	9	2	2	11/28/2014 10:42:40 AM	1	1	0	4	#NULL!	4	4	2	5	4	1	5	5	3	5	3	5	3	5	5	1	5	4	5	5	5	5	5	5	2	1	5	3	3	3	3	3	5	3	3	5	4.16667	4.57143	5
1736	19	9	2	2	11/28/2014 10:45:15 AM	1	1	0	4	#NULL!	4	4	2	5	4	4	2	2	3	2	4	2	3	4	5	2	4	4	2	2	2	2	2	2	4	2	2	3	3	5	3	1	2	3	3	3	2.83333	3.42857	2
1737	19	9	2	2	11/28/2014 11:10:16 AM	1	1	0	3	2	4	4	1	4	3	4	2	2	4	4	2	5	2	5	4	3	3	4	4	4	2	4	4	4	5	3	4	3	4	3	3	2	2	3	2	5	2.83333	3.85714	3.6
1738	19	9	2	2	11/28/2014 12:21:40 PM	1	1	0	4	#NULL!	3	4	1	4	3	3	3	3	3	3	3	2	3	3	4	4	2	3	2	5	3	4	3	4	4	4	4	3	1	3	3	2	1	3	3	3	3	2.71429	3.8
1739	19	9	2	2	11/28/2014 12:43:36 PM	1	1	0	3	2	3	3	2	3	4	2	4	2	2	2	4	4	2	4	2	2	4	2	2	4	2	4	2	4	2	2	2	2	2	2	2	2	2	2	4	4	3	2.85714	3.2
1740	19	9	2	2	11/28/2014 1:41:46 PM	1	1	0	2	1	4	4	1	5	5	1	5	3	5	5	3	4	5	5	4	2	4	3	3	4	3	5	4	5	2	4	2	3	5	5	2	3	1	3	5	3	4.33333	4	4.2
1741	19	9	2	2	11/28/2014 1:54:04 PM	1	1	0	3	2	3	3	2	3	4	3	3	4	4	4	3	4	4	3	4	3	3	4	4	3	2	3	2	2	4	3	4	3	2	3	4	3	1	4	3	4	3.66667	3.71429	2.4
1742	19	9	2	2	11/28/2014 2:04:06 PM	1	1	0	4	#NULL!	2	2	1	4	3	3	3	3	3	3	3	4	3	4	3	3	3	3	3	4	2	3	3	3	4	3	3	4	3	4	3	4	4	3	4	3	3	3.28571	3
1743	19	9	2	2	11/28/2014 2:49:43 PM	1	1	0	3	2	2	2	2	3	2	3	3	3	3	2	3	4	2	4	3	4	2	3	2	3	2	2	2	3	4	2	3	3	2	3	2	3	4	3	3	4	2.66667	2.85714	2.4
1744	19	9	2	2	11/28/2014 3:20:23 PM	1	1	0	4	#NULL!	4	4	1	4	4	2	4	4	3	4	4	4	4	4	4	3	3	4	4	5	4	4	3	5	2	2	2	2	2	2	2	2	3	4	3	4	3.83333	3.85714	4.2
1746	19	9	2	2	11/29/2014 10:53:24 AM	1	1	0	3	2	3	3	2	2	2	3	3	2	2	4	3	2	3	2	2	3	3	4	3	4	1	3	2	1	5	4	#NULL!	2	2	3	3	1	2	2	2	3	2.66667	2.71429	2.2
1747	19	9	2	2	11/29/2014 12:31:04 PM	1	1	0	2	1	3	3	2	5	4	2	4	3	4	4	5	4	3	2	4	2	4	4	4	4	5	4	4	5	4	4	3	4	2	3	2	2	2	2	2	2	4	3.57143	4.4
1748	19	9	2	2	11/30/2014 12:38:44 PM	1	1	0	2	1	1	1	1	3	4	2	4	4	3	5	4	4	4	4	3	3	3	4	4	4	3	4	3	3	4	4	4	3	2	3	3	4	2	3	4	3	4	3.71429	3.4
1749	19	9	2	2	11/30/2014 1:45:12 PM	1	1	0	3	2	4	4	2	5	4	3	3	3	3	4	3	4	4	3	3	3	3	3	3	4	3	4	4	3	3	3	3	2	3	4	2	2	2	3	2	3	3.33333	3.28571	3.6
1750	19	9	2	2	41651.661168981482	1	1	0	3	2	4	4	1	5	4	3	3	2	4	4	4	4	3	4	4	3	3	4	4	4	4	4	3	5	5	4	3	4	1	3	3	1	3	4	3	5	3.5	3.71429	4
1751	19	9	2	2	41651.677372685182	1	1	0	3	2	4	4	2	4	3	3	3	3	3	4	4	4	3	4	4	2	4	3	4	4	2	3	3	3	2	2	3	2	2	3	3	2	3	3	3	4	3.33333	3.71429	3
1752	19	9	2	2	41651.760833333334	1	1	0	3	2	4	4	2	3	2	4	2	2	2	4	2	3	2	2	2	4	2	3	2	4	2	4	4	4	3	3	2	3	2	2	2	1	2	3	2	3	2.33333	2.28571	3.6
1753	19	9	2	2	41651.761111111111	1	1	0	3	2	2	4	2	4	2	3	3	3	4	2	4	4	3	3	2	4	2	2	2	2	1	2	1	2	4	4	4	3	2	2	1	1	4	2	#NULL!	2	3	2.57143	1.6
1754	19	9	2	2	41651.918668981481	1	1	0	3	2	4	4	2	5	2	4	2	2	2	3	4	2	2	4	2	4	2	2	2	1	1	3	1	2	5	4	4	4	1	2	1	2	1	2	2	2	2.5	2.28571	1.6
1756	19	9	2	2	41682.478726851848	1	1	0	4	#NULL!	4	4	2	4	4	2	4	4	4	4	4	5	2	4	4	2	4	4	3	2	2	2	2	4	5	3	3	3	2	3	3	3	2	3	3	3	4	3.71429	2.4
1757	19	9	2	2	41710.312013888892	1	1	0	3	2	2	2	2	3	3	3	3	2	3	1	3	3	4	2	2	4	2	3	3	3	2	2	2	4	2	2	1	3	1	3	3	2	1	3	3	3	2.5	2.71429	2.6
1758	19	9	2	2	41710.459988425922	1	1	0	3	2	2	2	2	4	2	4	2	2	1	2	2	1	2	1	2	2	4	#NULL!	4	4	1	2	2	1	4	2	4	2	1	2	4	1	3	3	2	#NULL!	1.83333	2.33333	2
1759	19	9	2	2	41710.481585648151	1	1	0	3	2	2	4	2	4	4	2	4	3	4	3	3	4	4	3	3	2	4	4	2	3	2	4	3	2	4	2	4	2	3	2	3	2	4	3	2	3	3.5	3.42857	2.8
1760	19	9	2	2	41710.60732638889	1	1	0	2	1	3	3	2	4	4	2	4	2	3	4	4	5	1	2	2	4	2	2	2	3	2	4	3	3	4	2	3	2	1	3	2	1	3	4	2	5	3.5	2.28571	3
1761	19	9	2	2	12/19/2014 2:01:51 PM	1	1	0	2	1	4	4	1	4	4	2	4	3	5	4	4	5	4	5	3	2	4	4	3	4	3	4	4	4	1	4	1	2	1	1	2	2	3	4	4	3	4	4	3.8
1762	19	9	2	2	12/19/2014 2:23:55 PM	1	1	0	2	1	4	4	1	5	5	1	5	4	3	5	5	5	3	5	4	2	4	4	4	4	4	4	4	4	#NULL!	4	3	2	2	3	2	2	3	4	4	4	4.5	4.14286	4
1763	19	9	2	2	12/19/2014 4:04:56 PM	1	1	0	2	1	1	1	2	3	4	2	4	2	2	4	4	4	4	4	4	3	3	4	3	4	4	4	4	4	3	1	3	2	1	3	1	1	2	2	2	4	3.33333	3.71429	4
1764	19	9	2	2	12/19/2014 4:34:51 PM	1	1	0	2	1	4	4	1	5	5	2	4	3	4	4	3	4	4	5	4	2	4	4	3	4	4	4	4	2	4	4	4	4	3	4	2	4	4	3	5	2	3.83333	4	3.6
1765	19	9	2	2	12/20/2014 11:43:38 AM	1	1	0	2	1	3	3	1	4	4	2	4	4	3	4	4	5	4	3	3	3	3	3	4	5	4	4	5	2	4	3	3	3	2	2	3	3	2	3	3	4	3.83333	3.57143	4
1766	19	9	2	2	12/21/2014 8:03:48 AM	1	1	0	2	1	2	2	1	4	5	2	4	4	4	4	4	4	4	4	4	3	3	4	4	4	3	4	4	4	2	4	3	5	2	4	1	2	2	3	3	4	4.16667	3.85714	3.8
1767	19	9	2	2	12/21/2014 9:36:02 PM	1	1	0	2	1	2	2	1	4	4	4	2	4	4	4	4	4	2	3	4	1	5	4	2	4	3	4	4	2	4	4	4	4	2	4	1	2	3	3	4	4	3.66667	3.42857	3.4
1768	19	9	2	2	12/22/2014 11:34:04 AM	1	1	0	2	1	4	4	1	5	5	2	4	3	2	3	4	4	3	4	2	3	3	4	3	4	4	4	3	3	4	3	3	3	3	3	3	3	2	3	2	4	3.5	3.28571	3.6
1769	19	9	2	2	12/22/2014 1:06:40 PM	1	1	0	2	1	2	2	1	5	5	2	4	4	5	5	5	4	3	4	4	1	5	4	5	2	1	2	2	1	4	2	4	4	1	1	1	1	2	3	4	3	4.66667	4.14286	1.6
1770	19	9	2	2	12/22/2014 1:27:19 PM	1	1	0	2	1	4	4	1	5	4	1	5	4	3	5	5	5	4	5	3	2	4	4	4	5	4	4	5	5	5	1	2	1	2	1	3	2	4	3	2	4	4.33333	4.14286	4.6
1771	19	9	2	2	12/22/2014 3:11:09 PM	1	1	0	2	1	2	2	1	3	4	4	2	4	3	5	5	5	4	5	4	2	4	5	4	5	4	5	5	4	3	2	2	2	3	4	2	2	2	4	4	4	3.83333	4.42857	4.6
1772	19	9	2	2	12/22/2014 9:53:08 PM	1	1	0	2	1	4	4	1	5	4	2	4	4	5	5	5	4	4	4	4	2	4	4	2	5	4	4	5	4	4	4	4	4	2	3	2	2	1	3	4	4	4.5	3.71429	4.4
1773	19	9	2	2	12/23/2014 4:16:40 PM	1	1	0	2	1	4	4	1	5	5	1	5	4	4	4	5	5	4	4	3	2	4	3	4	#NULL!	#NULL!	2	#NULL!	2	1	2	4	2	1	2	1	2	2	3	2	4	4.5	3.85714	2
1774	19	9	2	2	12/23/2014 4:23:39 PM	1	1	0	2	1	4	4	1	5	5	2	4	4	4	5	4	5	4	4	4	2	4	4	4	4	4	5	4	4	4	3	2	3	4	5	4	4	4	4	4	4	4.33333	4.14286	4.2
1775	19	9	2	2	12/23/2014 9:46:54 PM	1	1	0	2	1	4	4	1	5	4	4	2	1	3	4	3	5	1	4	3	2	4	3	2	5	3	4	4	4	2	2	3	3	2	3	3	3	2	3	4	4	2.83333	3.14286	4
1776	19	9	2	2	12/24/2014 8:24:12 PM	1	1	0	2	1	2	3	2	4	5	1	5	4	5	5	5	5	5	4	5	1	5	5	4	5	4	5	5	5	4	4	4	2	4	5	2	4	2	5	5	5	4.83333	4.71429	4.8
1777	19	9	2	2	12/26/2014 12:30:53 PM	1	1	0	2	1	4	4	1	5	5	2	4	4	4	5	4	4	4	4	4	1	5	5	4	4	4	4	4	4	4	3	3	4	2	3	3	3	3	4	4	3	4.33333	4.28571	4
1778	19	9	2	2	12/26/2014 2:14:36 PM	1	1	0	2	1	2	2	1	3	3	3	3	4	3	4	4	4	4	3	3	4	2	2	2	5	4	5	5	4	4	4	2	3	2	2	1	1	2	3	4	4	3.5	2.85714	4.6
1779	19	9	2	2	12/29/2014 10:06:00 AM	1	1	0	2	1	4	4	1	4	5	1	5	3	5	5	5	5	3	4	4	1	5	3	4	5	4	5	5	3	3	3	3	4	3	5	3	3	3	5	4	4	4.66667	4	4.4
1780	19	9	2	2	12/29/2014 11:40:58 AM	1	1	0	#NULL!	#NULL!	#NULL!	#NULL!	#NULL!	#NULL!	#NULL!	#NULL!	#NULL!	#NULL!	#NULL!	#NULL!	#NULL!	#NULL!	#NULL!	#NULL!	#NULL!	#NULL!	#NULL!	#NULL!	#NULL!	#NULL!	#NULL!	#NULL!	#NULL!	#NULL!	#NULL!	#NULL!	#NULL!	#NULL!	#NULL!	#NULL!	#NULL!	#NULL!	#NULL!	#NULL!	#NULL!	#NULL!	#NULL!	#NULL!	#NULL!
1781	19	9	2	2	12/29/2014 11:57:55 AM	1	1	0	2	1	4	4	#NULL!	4	5	1	5	4	5	5	4	4	5	4	4	1	5	5	5	5	3	4	4	3	3	1	3	1	3	3	2	2	4	4	4	5	4.66667	4.57143	3.8
1782	19	9	2	2	12/29/2014 12:24:37 PM	1	1	0	2	1	3	3	1	3	4	1	5	4	5	5	5	5	5	2	4	1	5	4	5	5	5	5	5	5	2	2	2	2	4	5	4	4	4	4	4	4	4.66667	4.28571	5
1783	19	9	2	2	12/29/2014 4:55:18 PM	1	1	0	2	1	1	1	1	3	5	1	5	4	5	5	4	5	4	5	4	2	4	4	4	5	5	4	5	4	2	3	2	1	4	4	4	3	3	4	3	4	4.66667	4.28571	4.6
1784	19	9	2	2	12/29/2014 4:58:20 PM	1	1	0	2	1	4	4	1	5	4	1	5	3	3	4	4	4	4	3	4	1	5	3	4	5	3	4	4	3	2	3	3	2	3	3	3	2	3	3	4	4	3.83333	3.85714	3.8
1785	19	9	2	2	12/29/2014 6:29:01 PM	1	1	0	2	1	4	4	2	4	5	2	4	3	4	4	4	4	3	4	3	1	5	3	3	5	4	4	4	4	4	4	4	4	2	4	3	4	3	3	3	3	4	3.57143	4.2
1786	19	9	2	2	12/29/2014 8:24:57 PM	1	1	0	2	1	1	1	1	3	4	1	5	3	4	4	4	4	4	4	3	2	4	5	3	5	4	4	5	4	4	4	4	4	2	4	2	3	4	3	4	3	4	3.85714	4.4
1787	19	9	2	2	12/30/2014 4:04:59 PM	1	1	0	2	1	1	1	1	3	5	2	4	4	4	4	3	4	4	4	4	2	4	4	4	5	4	5	5	4	2	2	3	3	3	4	3	2	3	3	4	3	4	4	4.6
1788	19	9	2	2	12/30/2014 7:12:11 PM	1	1	0	2	1	4	4	1	4	4	2	4	2	3	4	4	4	3	3	2	3	3	3	3	4	4	4	4	4	3	3	3	2	4	4	2	4	4	3	4	4	3.5	3	4
1789	19	9	2	2	12/30/2014 8:39:03 PM	1	1	0	2	1	4	4	1	5	1	5	1	1	1	5	5	1	1	1	1	5	1	1	1	1	1	1	1	1	5	5	5	5	1	1	1	1	1	1	1	1	2.33333	1	1
1790	19	9	2	2	12/30/2014 11:51:38 PM	1	1	0	2	1	2	2	1	4	4	2	4	4	3	4	4	4	4	4	4	2	4	3	3	5	3	4	3	3	4	4	4	3	3	4	3	2	2	3	4	4	3.83333	3.71429	3.6
1791	19	9	2	2	12/31/2014 12:37:57 PM	1	1	0	2	1	3	3	1	5	4	2	4	4	4	4	5	4	4	4	4	2	4	4	4	4	4	4	4	4	2	3	3	2	2	4	2	2	4	3	4	4	4.16667	4	4
1792	19	9	2	2	12/31/2014 3:20:56 PM	1	1	0	2	1	4	4	1	5	4	2	4	3	4	4	4	5	4	4	3	3	3	4	3	5	3	5	5	4	2	2	1	1	4	4	3	3	4	3	5	5	3.83333	3.71429	4.4
1793	19	9	2	2	12/31/2014 6:45:57 PM	1	1	0	2	1	4	4	2	4	5	4	2	1	3	4	3	4	4	4	3	4	2	2	4	3	2	4	3	2	4	2	2	2	2	3	3	4	1	3	2	4	3	3.28571	2.8
1794	19	9	2	2	12/31/2014 8:15:27 PM	1	1	0	2	1	4	4	2	5	4	2	4	3	3	3	4	4	3	4	2	2	4	3	3	4	3	4	4	3	4	4	3	4	2	4	3	2	3	3	2	4	3.5	3.28571	3.6
1795	19	9	2	2	42005.872361111113	1	1	0	2	1	3	3	1	4	5	1	5	5	5	5	5	5	5	5	5	1	5	5	5	5	5	5	5	5	2	1	4	2	5	5	5	5	4	5	5	5	5	5	5
1796	19	9	2	2	42036.891319444447	1	1	0	2	1	2	2	2	3	4	1	5	4	4	4	5	5	5	5	5	2	4	4	4	5	2	4	4	5	4	4	4	3	2	4	4	4	2	4	4	4	4.33333	4.57143	4
1797	19	9	2	2	42095.473460648151	1	1	0	2	1	2	2	1	4	5	3	3	3	2	3	3	4	1	4	3	3	3	3	2	4	2	3	1	3	4	4	4	4	1	1	1	1	1	3	4	4	3.16667	2.85714	2.6
1798	19	9	2	2	42156.674618055556	1	1	0	2	1	4	4	2	5	5	2	4	4	3	4	4	4	4	4	4	2	4	4	4	5	3	4	3	5	5	5	5	2	4	4	3	4	2	1	4	3	4	4	4
1799	19	9	2	2	42186.410208333335	1	1	0	2	1	3	3	1	4	4	1	5	5	5	5	4	5	5	5	5	2	4	5	5	5	3	5	4	4	4	4	4	4	4	4	3	4	4	4	5	5	4.66667	4.85714	4.2
1800	19	9	2	2	42339.406944444447	1	1	0	1	1	1	1	1	3	4	2	4	4	5	4	4	4	4	4	4	2	4	4	4	4	3	4	3	4	2	2	2	2	2	4	4	4	4	4	4	4	4.16667	4	3.6
1801	19	9	2	2	42339.413784722223	1	1	0	1	1	2	2	1	3	5	3	3	3	5	3	5	3	3	3	3	3	3	3	3	3	#NULL!	3	3	3	4	3	3	3	3	3	3	3	#NULL!	3	3	3	4	3	3
1802	19	9	2	2	42339.421134259261	1	1	0	1	1	2	2	1	3	4	1	5	4	5	5	5	5	5	2	5	1	5	4	5	5	4	5	5	5	3	4	1	1	2	2	3	3	4	5	5	5	4.66667	4.42857	4.8
1803	19	9	2	2	42339.866018518522	1	1	0	1	1	1	1	2	2	2	1	5	4	5	5	5	3	3	4	5	1	5	3	2	4	3	5	4	4	1	2	4	1	1	4	1	1	3	5	3	5	4.33333	3.57143	4
1804	19	9	2	2	1/13/2015 12:40:32 PM	1	1	0	1	1	2	2	2	3	4	2	4	3	3	5	4	4	3	1	4	3	3	2	3	5	3	3	2	4	2	2	2	1	2	3	3	1	4	4	4	4	3.83333	2.85714	3.4
1805	19	9	2	2	1/15/2015 6:12:14 PM	1	1	0	#NULL!	#NULL!	#NULL!	#NULL!	#NULL!	#NULL!	#NULL!	#NULL!	#NULL!	#NULL!	#NULL!	#NULL!	#NULL!	#NULL!	#NULL!	#NULL!	#NULL!	#NULL!	#NULL!	#NULL!	#NULL!	#NULL!	#NULL!	#NULL!	#NULL!	#NULL!	#NULL!	#NULL!	#NULL!	#NULL!	#NULL!	#NULL!	#NULL!	#NULL!	#NULL!	#NULL!	#NULL!	#NULL!	#NULL!	#NULL!	#NULL!
1806	19	9	2	2	1/16/2015 8:24:40 PM	1	1	0	1	1	1	1	2	3	5	2	4	4	4	5	4	4	4	5	4	2	4	5	3	4	3	4	3	4	4	4	3	3	2	4	2	3	4	4	4	4	4.33333	4.14286	3.6
1807	19	9	2	2	1/19/2015 8:20:05 AM	1	1	0	#NULL!	#NULL!	#NULL!	#NULL!	#NULL!	#NULL!	#NULL!	#NULL!	#NULL!	#NULL!	#NULL!	#NULL!	#NULL!	#NULL!	#NULL!	#NULL!	#NULL!	#NULL!	#NULL!	#NULL!	#NULL!	#NULL!	#NULL!	#NULL!	#NULL!	#NULL!	#NULL!	#NULL!	#NULL!	#NULL!	#NULL!	#NULL!	#NULL!	#NULL!	#NULL!	#NULL!	#NULL!	#NULL!	#NULL!	#NULL!	#NULL!
1808	19	9	2	2	1/20/2015 12:05:28 PM	1	1	0	1	1	1	1	1	2	3	4	2	3	4	3	4	3	3	4	3	2	4	4	4	4	3	4	3	5	1	1	4	2	2	3	1	1	3	3	4	4	3.16667	3.57143	3.8
1809	19	9	2	2	1/25/2015 9:39:30 PM	1	1	0	2	1	3	3	2	3	4	2	4	4	3	5	3	4	3	4	3	2	4	3	3	5	3	5	5	5	3	2	4	2	3	5	2	#NULL!	4	4	4	5	3.83333	3.42857	4.6
1810	19	9	2	2	1/30/2015 9:43:23 AM	1	1	0	1	1	2	2	2	2	5	2	4	4	4	4	4	4	4	4	4	2	4	4	4	5	4	4	4	4	4	4	4	1	4	4	3	2	3	4	4	4	4.16667	4	4.2
1850	22	9	2	5	42281.807916666665	1	1	0	3	2	3	3	2	3	3	4	2	4	3	4	2	4	3	4	3	2	4	4	2	4	1	3	3	3	2	4	4	1	1	3	2	2	1	4	2	4	3	3.42857	2.8
1851	23	9	2	1	42281.847638888888	1	1	0	3	2	2	3	2	3	4	2	4	3	4	4	5	3	3	4	3	2	4	4	4	4	3	4	3	4	4	4	3	2	4	4	4	3	3	3	4	4	4	3.57143	3.6
1852	22	9	2	5	42281.902442129627	1	1	0	2	1	3	3	2	5	5	2	4	4	3	4	4	4	5	5	3	2	4	3	4	5	1	5	5	2	5	4	3	4	1	2	2	2	2	4	3	4	4	4	3.6
1853	23	9	2	1	42281.998136574075	1	1	0	3	2	4	3	2	3	4	3	3	2	5	5	5	3	4	5	2	2	4	4	1	4	1	4	3	4	2	2	2	#NULL!	3	3	3	4	2	3	2	2	4	3.28571	3.2
1854	23	9	2	1	42312.116180555553	1	1	0	3	2	1	1	2	2	4	2	4	4	4	4	4	3	4	5	3	2	4	4	4	4	2	4	3	5	2	2	2	2	3	3	3	4	2	4	4	2	4	3.85714	3.6
1855	22	9	2	5	42312.141435185185	1	1	0	3	2	4	4	2	5	4	3	3	3	2	5	2	4	3	3	3	3	3	4	3	4	2	4	4	2	5	3	5	4	4	3	4	4	2	3	3	4	3.16667	3.28571	3.2
1856	22	9	2	5	42312.144629629627	1	1	0	3	2	4	4	2	5	4	3	3	3	2	5	2	4	3	3	3	3	3	4	3	3	2	2	2	3	5	2	3	3	3	3	2	2	2	3	3	3	3.16667	3.28571	2.4
1857	22	9	2	5	42312.259386574071	1	1	0	3	2	4	4	2	4	4	4	2	3	3	5	4	2	3	1	2	4	2	5	1	5	3	5	5	5	4	4	1	1	3	1	1	1	1	1	2	5	3.5	2.28571	4.6
1858	22	9	2	5	42312.329710648148	1	1	0	#NULL!	#NULL!	#NULL!	#NULL!	#NULL!	#NULL!	#NULL!	#NULL!	#NULL!	#NULL!	#NULL!	#NULL!	#NULL!	#NULL!	#NULL!	#NULL!	#NULL!	#NULL!	#NULL!	#NULL!	#NULL!	#NULL!	#NULL!	#NULL!	#NULL!	#NULL!	#NULL!	#NULL!	#NULL!	#NULL!	#NULL!	#NULL!	#NULL!	#NULL!	#NULL!	#NULL!	#NULL!	#NULL!	#NULL!	#NULL!	#NULL!
1859	22	9	2	5	42312.397453703707	1	1	0	4	#NULL!	2	2	2	2	3	4	2	2	3	3	4	2	4	3	2	1	5	2	4	5	5	5	5	4	2	1	2	2	1	2	5	1	1	2	2	2	2.83333	3.14286	4.8
1860	22	9	2	5	42312.528449074074	1	1	0	4	#NULL!	4	4	2	5	5	4	2	3	5	4	1	2	4	4	4	4	2	4	4	4	4	5	4	4	2	2	2	3	3	4	2	2	2	3	3	4	3.33333	3.42857	4.2
1861	22	9	2	5	42312.664201388892	1	1	0	#NULL!	#NULL!	#NULL!	#NULL!	#NULL!	#NULL!	4	2	4	4	1	2	2	4	3	2	4	2	4	4	3	#NULL!	#NULL!	2	#NULL!	#NULL!	5	4	5	4	1	5	4	2	#NULL!	#NULL!	2	2	2.83333	3.42857	2
1862	23	9	2	1	42312.684293981481	1	1	0	3	2	2	2	2	2	5	1	5	5	5	5	5	4	5	5	5	2	4	5	4	5	5	4	5	3	5	1	5	4	2	3	3	4	1	2	4	1	5	4.57143	4.4
1863	22	9	2	5	42312.706793981481	1	1	0	2	1	4	4	1	5	5	3	3	2	3	5	4	5	3	4	2	2	4	3	3	5	5	4	5	3	1	1	3	1	3	5	3	3	4	3	2	4	3.66667	3.42857	4.4
1864	23	9	2	1	42312.722615740742	1	1	0	2	1	4	4	1	4	4	1	5	4	5	4	5	5	3	3	3	1	5	3	3	4	5	5	4	5	4	4	1	1	1	1	2	1	3	4	4	3	4.5	3.57143	4.6
1865	22	9	2	5	42312.796423611115	1	1	0	2	1	3	3	1	4	5	2	4	4	4	4	4	5	3	3	4	2	4	3	4	5	4	4	4	5	4	4	4	4	2	4	2	3	2	3	2	4	4.16667	3.71429	4.4
1866	23	9	2	1	42312.880069444444	1	1	0	2	1	2	2	1	3	4	2	4	4	4	3	4	4	4	4	3	2	4	3	3	4	4	4	4	4	3	2	2	3	3	3	3	3	4	4	3	4	3.83333	3.57143	4
1867	22	9	2	5	42342.33834490741	1	1	0	3	2	3	4	2	3	4	2	4	3	4	4	4	4	3	4	3	3	3	3	2	4	4	4	4	4	5	2	4	2	4	4	2	4	2	4	4	2	3.83333	3.14286	4
1868	22	9	2	5	42342.376435185186	1	1	0	3	2	4	4	2	5	4	4	2	3	4	4	4	3	2	2	1	3	3	4	2	4	1	4	4	4	5	2	4	3	2	4	1	4	1	4	2	4	3.5	2.42857	3.4
1869	22	9	2	5	42342.439826388887	1	1	0	2	1	2	2	2	3	5	5	1	4	5	4	4	4	4	5	3	3	3	2	3	4	2	4	3	4	3	3	3	3	2	4	1	2	2	3	3	4	3.83333	3.42857	3.4
1870	22	9	2	5	42342.461597222224	1	1	0	3	2	1	1	2	5	4	2	4	3	2	4	2	4	4	4	4	2	4	4	4	5	4	4	4	5	4	4	4	2	3	3	3	3	2	2	2	2	3.16667	4	4.4
1871	22	9	2	5	42342.650324074071	1	1	0	3	2	4	4	2	4	1	2	4	1	1	4	2	1	1	1	5	4	2	4	2	4	1	2	2	5	5	4	2	1	1	1	1	1	1	1	4	2	2.16667	2.28571	2.8
1874	23	9	2	1	42342.837002314816	1	1	0	3	2	4	4	2	4	5	5	1	5	5	5	5	5	5	5	4	1	5	#NULL!	4	5	3	3	3	5	4	3	4	4	4	4	2	4	1	3	4	5	4.33333	4.66667	3.8
1876	23	9	2	1	42342.881273148145	1	1	0	3	2	3	3	2	3	5	4	2	4	5	5	5	3	4	5	5	2	4	5	5	4	4	5	3	4	4	4	4	4	4	4	4	4	2	3	4	3	4.33333	4.42857	4
1877	22	9	2	5	42342.889594907407	1	1	0	2	1	2	2	2	3	4	2	4	3	3	4	4	4	4	4	4	2	4	4	4	4	3	4	3	4	4	2	2	2	3	4	3	4	3	4	4	4	3.66667	4	3.6
1878	22	9	2	5	42342.99726851852	1	1	0	3	2	#NULL!	4	2	5	4	3	3	3	3	4	2	2	3	4	2	3	3	4	3	4	3	3	4	2	5	3	3	4	3	2	2	3	2	3	3	4	3.16667	3	3.2
1881	23	9	2	1	4/13/2015 4:41:58 AM	1	1	0	3	2	4	4	2	5	5	2	4	4	5	5	5	4	5	4	3	1	5	3	3	5	4	3	4	5	4	3	5	4	1	3	3	2	2	2	3	3	4.66667	3.85714	4.2
1883	23	9	2	1	4/13/2015 4:42:53 AM	1	1	0	1	1	1	1	2	2	3	2	4	4	2	3	4	3	3	1	2	3	3	3	3	4	2	3	3	4	5	4	3	4	1	2	2	3	1	4	3	1	3.33333	2.57143	3.2
1884	23	9	2	1	4/13/2015 10:14:54 AM	1	1	0	3	2	1	1	2	2	4	2	4	4	4	5	5	5	5	4	3	2	4	4	4	5	4	5	4	5	2	2	3	4	4	4	3	4	4	5	5	4	4.33333	4.14286	4.6
1885	22	9	2	5	4/13/2015 10:17:56 AM	1	1	0	4	#NULL!	3	3	1	5	5	2	4	5	3	4	4	5	5	4	5	2	4	4	4	5	3	4	3	5	2	3	2	3	2	5	3	2	4	3	4	4	4.16667	4.42857	4
1886	23	9	2	1	4/13/2015 10:52:48 AM	1	1	0	2	1	4	4	1	5	5	2	4	4	3	4	5	4	3	4	3	1	5	4	4	4	3	4	4	3	2	2	2	2	2	2	1	2	3	3	4	4	4.16667	3.85714	3.6
1887	22	9	2	5	4/13/2015 11:10:14 AM	1	1	0	3	2	4	4	2	5	5	1	5	3	3	5	5	2	3	4	5	2	4	5	4	5	2	4	4	4	5	4	3	4	4	4	5	4	4	4	4	5	4.33333	3.85714	3.8
1888	22	9	2	5	4/13/2015 11:10:28 AM	1	1	0	2	1	4	4	1	4	5	2	4	4	5	5	5	4	5	5	3	2	4	3	4	5	4	5	5	5	2	3	2	3	3	3	3	4	2	4	4	5	4.66667	4	4.8
1889	22	9	2	5	4/13/2015 11:40:48 AM	1	1	0	1	1	2	2	2	2	4	2	4	3	4	4	4	5	4	3	4	3	3	3	3	4	4	4	4	4	4	4	3	2	1	4	3	1	4	4	3	4	3.83333	3.57143	4
1890	22	9	2	5	4/13/2015 12:22:14 PM	1	1	0	2	1	4	4	1	5	5	2	4	4	4	4	5	5	4	5	4	1	5	3	4	5	4	5	5	5	2	3	2	3	2	4	3	3	4	3	2	3	4.33333	4.28571	4.8
1891	22	9	2	5	4/13/2015 2:19:22 PM	1	1	0	3	2	3	3	2	3	4	2	4	2	2	4	4	4	2	5	5	4	2	4	2	4	1	2	3	2	5	4	2	4	2	2	1	2	1	2	4	2	3.33333	3.42857	2.4
1892	22	9	2	5	4/13/2015 2:52:45 PM	1	1	0	2	1	4	4	2	4	4	4	2	4	4	3	5	4	4	3	3	3	3	4	4	5	4	4	4	5	4	3	2	2	1	3	2	2	3	2	3	2	3.66667	3.57143	4.4
1893	22	9	2	5	4/13/2015 3:15:41 PM	1	1	0	2	1	4	4	1	5	5	1	5	5	3	5	4	3	4	4	5	1	5	4	4	4	5	5	4	5	4	2	4	3	3	4	2	3	2	4	5	4	4.5	4.14286	4.6
1895	22	9	2	5	4/13/2015 4:13:56 PM	1	1	0	#NULL!	#NULL!	#NULL!	#NULL!	#NULL!	#NULL!	#NULL!	#NULL!	#NULL!	#NULL!	#NULL!	#NULL!	#NULL!	#NULL!	#NULL!	#NULL!	#NULL!	#NULL!	#NULL!	#NULL!	#NULL!	#NULL!	#NULL!	#NULL!	#NULL!	#NULL!	#NULL!	#NULL!	#NULL!	#NULL!	#NULL!	#NULL!	#NULL!	#NULL!	#NULL!	#NULL!	#NULL!	#NULL!	#NULL!	#NULL!	#NULL!
1896	23	9	2	1	4/13/2015 5:38:05 PM	1	1	0	3	2	3	3	2	5	5	1	5	4	4	5	5	4	5	4	2	1	5	4	5	4	2	2	3	4	4	4	2	4	4	3	4	5	2	4	2	5	4.66667	4.14286	3
1897	23	9	2	1	4/13/2015 5:38:54 PM	1	1	0	3	2	4	4	2	4	4	1	5	4	5	5	4	4	4	4	4	1	5	4	4	3	1	4	3	4	4	4	2	4	2	1	3	2	2	4	4	4	4.5	4.14286	3
1898	22	9	2	5	4/13/2015 5:59:24 PM	1	1	0	2	1	2	2	1	5	4	1	5	5	5	4	5	4	4	4	1	1	5	5	5	5	1	5	3	4	4	1	2	4	4	5	1	2	2	3	4	5	4.66667	4	3.6
1899	23	9	2	1	4/13/2015 7:36:31 PM	1	1	0	3	2	4	4	2	4	5	1	5	3	4	5	5	4	4	4	3	2	4	4	4	4	3	4	4	5	3	4	2	2	3	2	2	2	2	4	3	3	4.5	3.85714	4
1900	22	9	2	5	4/13/2015 7:43:32 PM	1	1	0	1	1	2	2	1	3	4	4	2	4	4	4	4	4	3	3	2	4	2	2	3	5	4	4	4	4	4	4	2	2	1	5	3	3	4	3	4	3	3.66667	2.71429	4.2
1901	22	9	2	5	4/13/2015 7:56:24 PM	1	1	0	3	2	3	4	2	3	3	2	4	2	4	4	4	4	4	4	4	2	4	2	4	5	5	5	5	5	3	1	1	1	3	4	3	3	2	2	4	1	3.5	3.71429	5
1902	22	9	2	5	4/14/2015 1:02:37 AM	1	1	0	3	2	4	4	2	5	4	1	5	3	4	3	3	3	3	3	3	2	4	3	3	3	3	3	3	3	3	3	4	3	2	2	1	1	1	3	3	3	3.66667	3.14286	3
1903	22	9	2	5	4/14/2015 10:15:13 AM	1	1	0	2	1	3	3	2	4	4	2	4	4	4	4	4	4	4	4	3	2	4	3	4	5	4	4	5	4	3	4	3	2	2	4	2	2	4	3	2	4	4	3.71429	4.4
1904	22	9	2	5	4/14/2015 10:26:43 AM	1	1	0	2	1	2	2	1	3	4	2	4	3	3	3	3	3	3	4	2	2	4	2	2	4	3	3	2	4	5	4	3	4	2	2	2	2	2	2	3	3	3.33333	2.85714	3.2
1905	22	9	2	5	4/14/2015 10:41:53 AM	1	1	0	2	1	3	3	2	4	4	2	4	4	5	4	5	4	4	5	4	1	5	5	4	4	3	4	4	4	4	4	4	4	3	4	3	4	3	3	3	4	4.33333	4.42857	3.8
1907	22	9	2	5	4/14/2015 12:14:15 PM	1	1	0	3	2	1	1	2	5	5	2	4	3	3	4	4	5	3	4	4	3	3	4	3	4	3	4	4	4	2	3	1	1	3	4	3	4	3	4	2	5	3.83333	3.71429	3.8
1908	22	9	2	5	4/14/2015 1:13:28 PM	1	1	0	4	#NULL!	1	1	2	4	5	1	5	4	3	5	4	5	4	5	4	1	5	2	4	5	4	4	5	5	1	1	1	1	2	4	3	2	4	4	4	4	4.33333	4.14286	4.6
1909	22	9	2	5	4/14/2015 1:20:39 PM	1	1	0	2	1	4	4	1	5	5	2	4	3	4	4	5	5	4	4	2	1	5	4	3	5	4	4	4	5	4	5	3	4	2	4	2	2	2	2	3	4	4.16667	3.85714	4.4
1910	23	9	2	1	4/14/2015 3:13:32 PM	1	1	0	2	1	3	3	2	4	5	1	5	5	5	5	5	5	5	5	5	1	5	5	5	5	4	5	5	5	3	1	1	1	3	4	3	4	4	2	5	5	5	5	4.8
1911	22	9	2	5	4/14/2015 3:17:32 PM	1	1	0	3	2	4	4	2	4	#NULL!	#NULL!	#NULL!	#NULL!	#NULL!	#NULL!	#NULL!	#NULL!	#NULL!	#NULL!	#NULL!	#NULL!	#NULL!	#NULL!	#NULL!	4	#NULL!	#NULL!	3	4	#NULL!	#NULL!	#NULL!	#NULL!	#NULL!	#NULL!	#NULL!	#NULL!	#NULL!	#NULL!	#NULL!	#NULL!	#NULL!	#NULL!	3.66667
1912	23	9	2	1	4/14/2015 9:14:22 PM	1	1	0	3	2	3	3	2	3	3	4	2	4	2	5	4	5	4	5	4	2	4	3	4	4	3	4	4	4	2	2	2	2	2	3	3	3	1	3	3	4	3.33333	4.14286	3.8
1913	23	9	2	1	4/14/2015 9:14:32 PM	1	1	0	3	2	3	3	2	5	3	2	4	4	3	4	4	4	4	4	4	2	4	4	4	3	3	4	3	2	2	2	2	2	1	1	2	4	1	3	3	4	3.66667	4	3
1914	22	9	2	5	4/14/2015 9:27:28 PM	1	1	0	2	1	4	4	1	4	4	2	4	4	4	5	4	5	4	3	3	2	4	4	5	5	2	5	5	4	5	4	3	4	3	3	3	4	3	3	2	4	4.16667	4	4.2
1915	22	9	2	5	4/14/2015 9:49:20 PM	1	1	0	3	2	3	4	2	3	4	2	4	3	2	4	4	3	3	3	4	3	3	3	2	4	3	4	3	4	4	3	2	2	3	4	2	2	2	3	2	4	3.5	3	3.6
1916	23	9	2	1	4/14/2015 9:53:02 PM	1	1	0	2	1	4	4	1	5	4	2	4	4	3	4	5	4	4	3	3	2	4	3	4	4	3	4	4	4	4	2	3	4	2	4	3	3	2	4	2	4	4	3.57143	3.8
1917	22	9	2	5	4/15/2015 8:22:04 AM	1	1	0	4	#NULL!	2	4	2	5	5	4	2	2	3	4	2	4	2	4	4	4	2	4	2	5	2	5	5	4	2	4	2	4	4	4	2	4	4	2	3	4	3	3.14286	4.2
1918	22	9	2	5	4/15/2015 9:18:53 AM	1	1	0	3	2	2	2	2	3	4	3	3	2	2	2	4	4	3	3	3	4	2	2	2	5	3	4	4	4	4	2	3	2	2	3	2	2	2	3	4	3	2.83333	2.71429	4
1919	23	9	2	1	4/15/2015 10:09:54 AM	1	1	0	3	2	1	1	2	2	4	2	4	3	4	4	4	4	3	4	4	2	4	4	3	4	2	4	2	3	4	3	2	3	3	5	3	4	2	3	4	2	3.83333	3.71429	3
1920	23	9	2	1	4/15/2015 10:56:44 AM	1	1	0	3	2	4	4	2	4	4	3	3	4	4	4	4	3	3	4	4	3	3	3	3	4	3	3	3	4	4	5	3	5	3	4	2	3	2	3	3	2	3.83333	3.28571	3.4
1921	23	9	2	1	4/15/2015 11:00:51 AM	1	1	0	4	#NULL!	1	1	1	2	4	2	4	4	4	4	4	5	4	3	3	2	4	4	4	5	4	4	4	4	3	3	2	3	3	3	3	3	2	5	4	4	4	3.85714	4.2
1922	22	9	2	5	4/15/2015 11:51:50 AM	1	1	0	2	1	2	2	1	3	4	2	4	3	4	4	5	4	3	4	3	2	4	3	3	4	3	4	4	4	3	4	4	2	3	3	4	4	3	3	2	4	4	3.42857	3.8
1923	22	9	2	5	4/15/2015 12:15:27 PM	1	1	0	#NULL!	#NULL!	#NULL!	#NULL!	#NULL!	#NULL!	4	1	5	5	5	5	5	5	4	4	4	2	4	5	4	#NULL!	#NULL!	4	#NULL!	#NULL!	4	5	5	5	2	3	3	3	#NULL!	3	4	4	4.83333	4.28571	4
1924	22	9	2	5	4/15/2015 12:17:14 PM	1	1	0	2	1	4	4	1	5	3	4	2	3	3	4	3	3	3	4	2	4	2	4	2	3	3	4	3	3	4	4	4	2	2	2	3	2	3	3	4	3	3	2.85714	3.2
1925	23	9	2	1	4/15/2015 12:57:25 PM	1	1	0	1	1	1	1	2	2	4	2	4	4	4	4	4	5	3	4	4	2	4	4	3	4	3	4	4	4	3	4	3	3	3	3	3	4	3	4	3	3	4	3.85714	3.8
1926	22	9	2	5	4/15/2015 2:18:04 PM	1	1	0	3	2	1	2	1	2	5	4	2	3	2	5	4	4	3	4	4	3	3	4	3	5	4	5	4	4	4	2	2	2	2	2	3	4	2	4	2	4	3.5	3.57143	4.4
1927	23	9	2	1	4/15/2015 3:53:25 PM	1	1	0	2	1	3	3	2	4	5	2	4	3	5	5	5	5	5	4	4	2	4	5	4	5	5	5	5	5	3	3	3	3	4	4	3	4	2	4	4	5	4.5	4.42857	5
1928	23	9	2	1	4/15/2015 8:40:35 PM	1	1	0	3	2	2	4	2	3	3	2	4	1	2	2	3	3	2	3	1	4	2	1	2	4	4	3	4	1	4	3	5	#NULL!	1	3	1	2	3	1	1	4	2.5	2	3.2
1929	23	9	2	1	4/15/2015 9:45:36 PM	1	1	0	3	2	4	4	2	5	4	4	2	3	4	5	4	5	4	4	3	2	4	4	5	5	4	5	5	4	3	3	5	4	3	3	3	4	3	5	4	5	3.66667	4.14286	4.6
1930	23	9	2	1	4/15/2015 11:15:18 PM	1	1	0	3	2	3	4	1	4	5	1	5	5	4	5	5	5	5	5	4	1	5	4	5	5	3	5	5	5	2	2	4	4	3	2	3	2	2	3	4	4	4.83333	4.71429	4.6
1931	23	9	2	1	4/16/2015 3:57:21 AM	1	1	0	3	2	4	4	1	5	3	4	2	2	4	4	5	4	3	3	3	2	4	3	3	4	3	4	4	4	4	2	2	2	3	3	2	2	1	3	3	3	3.33333	3.28571	3.8
1932	23	9	2	1	4/16/2015 5:00:45 AM	1	1	0	3	2	2	2	2	3	2	4	2	4	4	5	4	4	4	1	4	2	4	5	1	4	2	4	2	4	5	5	2	1	1	2	1	1	1	1	4	1	3.5	3.28571	3.2
1933	22	9	2	5	4/16/2015 11:45:12 AM	1	1	0	2	1	2	2	2	4	5	2	4	4	3	4	5	5	4	4	3	2	4	4	4	5	2	4	3	5	4	4	4	2	2	3	2	3	3	3	4	4	4.16667	4	3.8
1934	23	9	2	1	4/16/2015 3:23:09 PM	1	1	0	2	1	2	2	2	3	5	2	4	3	5	5	5	5	3	4	1	2	4	4	4	5	5	5	5	5	5	5	5	3	3	4	2	3	1	4	5	4	4.5	3.57143	5
1935	23	9	2	1	4/16/2015 7:38:06 PM	1	1	0	3	2	4	4	2	4	5	2	4	3	4	5	5	4	4	5	3	5	1	4	4	4	2	5	4	4	4	4	2	2	3	4	2	4	3	3	4	2	4.33333	3.57143	3.8
1936	23	9	2	1	4/17/2015 3:51:05 AM	1	1	0	3	2	3	3	2	5	2	3	3	3	4	4	4	3	4	4	2	3	3	3	3	3	2	3	3	3	4	4	4	3	2	3	3	3	2	3	2	3	3.33333	3.14286	2.8
1937	23	9	2	1	4/17/2015 4:10:08 AM	1	1	0	3	2	4	4	1	4	4	2	4	2	4	5	4	3	4	5	3	2	4	3	3	4	4	3	3	3	5	2	4	2	3	2	2	4	1	2	4	1	3.83333	3.57143	3.4
1938	23	9	2	1	4/17/2015 9:45:12 AM	1	1	0	2	1	3	3	1	5	5	1	5	4	5	4	5	5	5	5	5	1	5	4	4	5	2	5	5	5	4	4	1	1	5	5	3	5	2	4	4	5	4.66667	4.71429	4.4
1939	22	9	2	5	4/17/2015 2:17:43 PM	1	1	0	3	2	4	4	2	5	4	2	4	3	3	4	4	4	2	2	5	2	4	5	4	5	3	4	4	4	5	4	2	4	3	3	3	4	1	3	4	4	3.66667	3.71429	4
1940	23	9	2	1	4/17/2015 3:16:53 PM	1	1	0	4	#NULL!	3	#NULL!	2	5	4	2	4	4	3	4	5	4	3	5	4	1	5	3	5	5	3	5	5	4	5	3	2	3	4	4	3	2	2	1	3	1	4	4.14286	4.4
1941	23	9	2	1	4/17/2015 4:45:29 PM	1	1	0	2	1	3	3	2	4	3	4	2	3	3	4	3	3	3	2	1	4	2	2	4	3	2	3	3	3	5	5	5	5	2	4	2	2	1	2	#NULL!	2	3	2.42857	2.8
1942	23	9	2	1	4/17/2015 5:47:13 PM	1	1	0	3	2	4	4	2	4	4	2	4	4	4	5	5	4	4	5	4	2	4	4	5	5	4	4	4	4	3	2	2	2	3	3	3	4	2	3	4	4	4.33333	4.28571	4.2
1943	23	9	2	1	4/17/2015 6:09:45 PM	1	1	0	2	1	2	2	2	3	5	2	4	4	4	5	4	4	4	4	4	2	4	4	4	4	4	4	4	4	4	4	4	3	4	4	4	4	3	4	4	4	4.33333	4	4
1944	23	9	2	1	4/17/2015 8:12:11 PM	1	1	0	3	2	4	4	1	5	5	2	4	2	3	4	5	4	4	4	2	1	5	4	1	5	3	4	3	4	3	3	4	3	2	4	4	2	2	3	4	4	3.83333	3.42857	3.8
1945	22	9	2	5	4/18/2015 1:27:12 AM	1	1	0	3	2	2	2	1	2	4	3	3	2	2	4	4	2	4	4	4	4	2	5	4	5	4	3	5	3	4	3	2	4	2	2	2	2	2	3	4	3	3.16667	3.57143	4
1946	22	9	2	5	4/18/2015 1:36:28 AM	1	1	0	3	2	3	3	2	3	4	2	4	3	4	4	4	4	3	3	3	3	3	3	3	4	2	4	3	4	4	3	2	2	2	3	2	3	2	3	4	4	3.83333	3.14286	3.4
1947	23	9	2	1	4/18/2015 2:39:12 AM	1	1	0	3	2	1	1	2	3	5	1	5	5	5	5	5	5	3	5	5	1	5	5	5	5	4	5	5	5	1	4	1	4	5	5	3	5	2	5	5	5	5	4.71429	4.8
1948	22	9	2	5	4/18/2015 4:03:09 PM	1	1	0	3	2	4	4	2	5	1	5	1	1	2	1	3	1	3	2	2	4	2	2	2	5	2	1	1	1	5	2	4	1	1	3	1	1	1	1	5	1	1.5	2	2
1949	23	9	2	1	4/18/2015 4:25:09 PM	1	1	0	1	1	1	1	2	2	5	2	4	5	5	5	5	5	5	4	3	2	4	4	4	5	3	5	4	4	3	3	2	2	4	5	3	3	3	5	3	4	4.83333	4.14286	4.2
1950	22	9	2	5	4/18/2015 7:15:55 PM	1	1	0	3	2	1	1	2	2	4	1	5	4	4	5	4	4	3	5	5	1	5	5	4	5	4	5	4	4	2	1	1	1	3	2	3	3	2	4	5	4	4.33333	4.42857	4.4
1951	22	9	2	5	4/18/2015 8:05:36 PM	1	1	0	3	2	4	4	2	5	5	4	2	4	2	5	2	2	3	5	4	4	2	4	4	5	4	4	3	5	5	1	1	1	3	5	2	4	2	4	5	4	3.33333	3.42857	4.2
1952	23	9	2	1	4/18/2015 10:16:30 PM	1	1	0	3	2	3	3	2	3	5	2	4	4	4	5	5	4	3	4	2	2	4	3	4	5	5	5	5	5	2	2	3	2	1	3	3	2	2	4	3	4	4.5	3.42857	5
1953	23	9	2	1	4/18/2015 10:37:41 PM	1	1	0	3	2	2	2	2	2	4	2	4	3	4	4	5	3	4	3	4	2	4	4	4	4	5	4	4	4	4	4	3	4	1	4	3	2	1	4	3	3	4	3.71429	4.2
1954	23	9	2	1	4/18/2015 10:46:52 PM	1	1	0	3	2	4	4	2	5	1	3	3	5	4	3	2	3	2	3	3	2	4	4	3	4	3	2	4	4	2	3	3	2	5	5	4	4	2	4	2	4	3	3.14286	3.4
1955	23	9	2	1	4/19/2015 12:42:18 PM	1	1	0	2	1	4	4	2	4	5	1	5	5	5	5	5	5	5	5	5	1	5	4	4	5	4	5	5	5	4	3	4	3	3	4	3	4	4	4	4	3	5	4.71429	4.8
1956	23	9	2	1	4/19/2015 1:07:02 PM	1	1	0	3	2	2	2	2	3	4	2	4	2	2	4	4	4	4	5	1	2	4	2	3	3	1	2	2	5	4	2	4	2	2	2	4	2	1	3	2	2	3.33333	3.28571	2.6
1957	23	9	2	1	4/19/2015 1:25:04 PM	1	1	0	4	#NULL!	2	3	2	2	4	1	5	4	4	5	3	4	3	4	4	1	5	2	3	4	4	4	4	4	4	4	4	3	3	4	3	4	2	4	3	4	4.16667	3.57143	4
1958	23	9	2	1	4/19/2015 5:43:55 PM	1	1	0	1	1	2	2	2	2	5	2	4	4	4	5	5	4	5	4	4	2	4	3	4	4	4	4	4	4	2	5	1	2	2	2	2	1	5	4	4	5	4.5	4	4
1959	23	9	2	1	4/19/2015 6:04:53 PM	1	1	0	3	2	4	4	1	4	2	2	4	3	5	5	5	5	3	3	4	3	3	2	4	3	2	3	3	5	3	2	3	1	2	3	3	1	1	2	3	2	4	3.42857	3.2
1960	23	9	2	1	4/19/2015 7:10:54 PM	1	1	0	3	2	3	3	1	5	3	3	3	2	2	4	3	2	2	4	2	2	4	4	3	3	2	3	3	3	4	4	4	4	3	4	2	3	2	4	4	4	2.83333	3	2.8
1961	22	9	2	5	4/19/2015 10:18:23 PM	1	1	0	#NULL!	#NULL!	#NULL!	#NULL!	#NULL!	#NULL!	#NULL!	#NULL!	#NULL!	#NULL!	#NULL!	#NULL!	#NULL!	#NULL!	#NULL!	#NULL!	#NULL!	#NULL!	#NULL!	#NULL!	#NULL!	#NULL!	#NULL!	#NULL!	#NULL!	#NULL!	#NULL!	#NULL!	#NULL!	#NULL!	#NULL!	#NULL!	#NULL!	#NULL!	#NULL!	#NULL!	#NULL!	#NULL!	#NULL!	#NULL!	#NULL!
1962	22	9	2	5	4/19/2015 10:58:16 PM	1	1	0	2	1	4	4	1	4	4	2	4	3	4	4	4	4	4	3	3	2	4	3	4	5	4	4	4	5	3	4	4	3	4	4	3	4	4	4	4	4	3.83333	3.57143	4.4
1963	23	9	2	1	4/19/2015 11:37:07 PM	1	1	0	3	2	2	3	2	2	4	4	2	3	4	4	3	4	4	4	4	3	3	4	4	2	2	3	2	4	3	3	3	3	2	3	2	2	2	2	4	2	3.33333	3.85714	2.6
1964	22	9	2	5	4/20/2015 10:27:40 AM	1	1	0	3	2	3	4	1	4	3	1	5	3	2	2	3	3	2	4	3	2	4	3	3	3	1	3	2	3	5	4	5	5	1	1	3	2	1	2	3	3	3	3.14286	2.4
1967	22	9	2	5	4/20/2015 1:05:14 PM	1	1	0	2	1	2	2	1	4	5	1	5	5	5	5	5	5	4	4	4	2	4	5	4	5	4	5	5	4	3	4	1	2	3	4	3	3	3	3	4	5	5	4.28571	4.6
1969	22	9	2	5	4/20/2015 5:16:39 PM	1	1	0	2	1	2	2	2	3	5	2	4	2	2	4	3	2	2	5	3	4	2	3	1	5	4	5	4	2	4	5	5	5	1	5	1	4	4	5	1	5	3.33333	2.57143	4
1971	23	9	2	1	4/21/2015 11:00:14 AM	1	1	0	2	1	1	1	1	3	5	2	4	4	4	5	5	5	4	3	3	2	4	4	4	5	4	5	5	5	2	3	4	4	1	3	2	2	2	4	2	4	4.5	3.85714	4.8
1972	22	9	2	5	4/21/2015 11:05:00 AM	1	1	0	1	1	1	2	1	2	4	2	4	3	4	4	3	2	2	1	3	2	4	4	2	5	3	4	3	4	5	5	5	5	3	#NULL!	4	2	1	3	2	2	3.66667	2.57143	3.8
1973	22	9	2	5	4/21/2015 11:05:13 AM	1	1	0	2	1	1	1	2	3	4	2	4	3	4	5	5	4	3	3	3	2	4	4	3	5	4	5	5	5	2	2	3	2	2	3	3	2	4	4	3	4	4.16667	3.42857	4.8
1974	22	9	2	5	4/21/2015 11:34:54 AM	1	1	0	4	#NULL!	2	2	2	4	5	2	4	5	5	4	5	5	3	4	4	2	4	4	4	5	2	4	3	5	4	3	4	4	3	5	3	5	4	3	5	5	4.66667	4	3.8
1975	22	9	2	5	4/21/2015 12:24:16 PM	1	1	0	2	1	1	1	2	3	4	2	4	4	4	4	5	4	4	2	4	2	4	4	4	5	4	4	4	4	2	4	2	2	4	4	3	4	4	3	4	4	4.16667	3.71429	4.2
1976	22	9	2	5	4/21/2015 1:48:21 PM	1	1	0	1	1	1	1	2	2	4	1	5	2	5	4	4	4	3	2	1	2	4	3	2	4	1	4	3	4	4	5	2	4	1	3	2	3	2	3	2	4	4	2.71429	3.2
1977	22	9	2	5	4/21/2015 1:49:44 PM	1	1	0	1	1	1	1	2	3	3	4	2	3	3	3	3	3	4	2	4	3	3	4	3	4	3	3	4	3	5	4	5	4	3	3	3	4	3	4	4	4	2.83333	3.28571	3.4
1978	23	9	2	1	4/21/2015 5:16:47 PM	1	1	0	3	2	2	2	2	2	5	2	4	2	3	4	4	3	3	5	4	3	3	4	3	4	3	3	3	4	5	2	4	3	2	4	3	3	1	3	3	3	3.66667	3.57143	3.4
1979	23	9	2	1	4/21/2015 8:04:58 PM	1	1	0	2	1	4	4	1	5	4	2	4	4	4	4	5	5	4	4	4	2	4	4	4	4	3	4	4	4	2	4	3	4	3	3	3	3	3	2	4	4	4.16667	4.14286	3.8
1980	22	9	2	5	4/21/2015 8:40:02 PM	1	1	0	2	1	4	4	1	5	3	3	3	2	4	5	4	4	4	4	5	3	3	4	4	4	3	5	5	4	5	4	4	3	3	5	3	3	2	3	3	3	3.5	4	4.2
1981	22	9	2	5	4/21/2015 9:13:08 PM	1	1	0	3	2	3	3	2	3	4	4	2	1	1	2	1	1	2	4	2	4	2	3	1	4	1	2	2	1	5	4	5	4	2	4	1	1	2	2	2	2	1.83333	2.14286	2
1982	22	9	2	5	4/21/2015 11:58:29 PM	1	1	0	#NULL!	#NULL!	#NULL!	#NULL!	#NULL!	#NULL!	#NULL!	#NULL!	#NULL!	#NULL!	#NULL!	#NULL!	#NULL!	#NULL!	#NULL!	#NULL!	#NULL!	#NULL!	#NULL!	#NULL!	#NULL!	#NULL!	#NULL!	#NULL!	#NULL!	#NULL!	#NULL!	#NULL!	#NULL!	#NULL!	#NULL!	#NULL!	#NULL!	#NULL!	#NULL!	#NULL!	#NULL!	#NULL!	#NULL!	#NULL!	#NULL!
1983	22	9	2	5	4/22/2015 8:03:46 AM	1	1	0	4	#NULL!	3	3	2	4	4	3	3	3	3	3	3	3	3	4	3	3	3	3	4	5	4	4	4	4	3	2	2	3	3	3	3	2	1	3	3	3	3.16667	3.28571	4.2
1984	22	9	2	5	4/22/2015 8:23:22 AM	1	1	0	2	1	1	1	2	3	5	4	2	4	4	4	4	4	4	3	3	2	4	2	3	4	4	4	4	4	4	4	4	3	3	4	3	3	4	3	4	3	3.83333	3.28571	4
1985	23	9	2	1	4/22/2015 10:19:44 AM	1	1	0	3	2	4	4	1	5	5	1	5	4	5	5	5	5	4	2	4	2	4	3	4	5	5	5	5	5	4	3	3	3	3	5	3	4	4	4	4	4	4.83333	3.71429	5
1986	22	9	2	5	4/22/2015 10:38:19 AM	1	1	0	3	2	2	2	1	4	5	2	4	2	1	4	5	4	3	1	2	4	2	1	3	5	1	4	4	4	5	4	4	4	1	4	1	2	1	2	4	4	3.5	2.28571	3.6
1987	22	9	2	5	4/22/2015 11:44:39 AM	1	1	0	3	2	4	4	1	5	2	2	4	4	1	4	2	2	2	3	4	4	2	4	2	4	1	2	2	2	4	2	2	2	1	1	2	2	1	2	3	2	2.83333	2.71429	2.2
1988	23	9	2	1	4/22/2015 1:30:58 PM	1	1	0	2	1	4	4	2	4	3	3	3	2	2	4	3	3	2	3	2	2	4	2	3	3	2	2	3	4	4	4	4	4	1	3	2	1	1	2	2	2	2.83333	2.71429	2.8
1989	22	9	2	5	4/23/2015 8:53:32 AM	1	1	0	2	1	3	3	1	4	5	2	4	3	4	4	4	4	4	4	4	2	4	3	3	5	3	4	4	5	3	3	3	3	3	3	2	2	3	2	4	4	4	3.71429	4.2
1990	22	9	2	5	4/23/2015 7:12:04 PM	1	1	0	4	#NULL!	1	1	2	4	5	2	4	4	3	4	4	4	3	4	4	2	4	4	3	5	4	5	5	4	2	2	3	3	3	3	3	4	2	5	3	4	4	3.71429	4.6
1991	23	9	2	1	4/24/2015 4:37:29 AM	1	1	0	3	2	4	4	2	4	4	2	4	4	4	5	5	4	3	3	3	3	3	3	5	5	4	4	5	5	4	2	4	5	3	2	2	3	2	4	2	4	4.33333	3.42857	4.6
1992	22	9	2	5	4/24/2015 9:04:21 AM	1	1	0	2	1	2	2	1	3	4	2	4	3	2	3	3	3	3	2	1	3	3	3	4	4	3	4	4	4	4	4	3	2	2	3	2	3	3	3	3	3	3.16667	2.71429	3.8
1993	23	9	2	1	4/24/2015 9:51:29 PM	1	1	0	3	2	4	4	2	4	4	2	4	3	4	4	4	4	3	4	4	4	2	3	2	4	2	4	3	4	2	2	4	2	3	3	2	4	4	4	4	4	3.83333	3.14286	3.4
1994	23	9	2	1	4/25/2015 2:04:46 PM	1	1	0	1	1	2	2	2	2	4	2	4	4	4	4	4	4	3	2	2	2	4	4	4	3	3	4	4	4	4	4	4	3	3	4	3	4	2	4	2	3	4	3.28571	3.6
1996	23	9	2	1	4/26/2015 5:47:22 PM	1	1	0	3	2	2	2	1	4	2	3	3	3	2	3	3	4	2	3	3	2	4	2	3	3	1	3	2	3	3	3	3	4	2	3	3	3	2	2	1	2	2.66667	3	2.4
1997	23	9	2	1	4/28/2015 10:22:47 AM	1	1	0	3	2	2	3	2	3	4	2	4	4	5	5	5	5	4	4	4	2	4	4	5	4	2	4	4	4	4	2	2	2	4	4	3	4	2	4	4	4	4.5	4.28571	3.6
1998	22	9	2	5	4/29/2015 9:05:49 AM	1	1	0	2	1	4	4	1	5	4	3	3	2	3	3	4	4	4	2	2	1	5	2	4	5	4	3	2	4	4	2	2	2	2	3	2	4	3	2	2	2	3.16667	3.28571	3.6
1999	22	9	2	5	4/29/2015 1:58:31 PM	1	1	0	#NULL!	#NULL!	#NULL!	#NULL!	#NULL!	#NULL!	#NULL!	#NULL!	#NULL!	#NULL!	#NULL!	#NULL!	#NULL!	#NULL!	#NULL!	#NULL!	#NULL!	#NULL!	#NULL!	#NULL!	#NULL!	#NULL!	#NULL!	#NULL!	#NULL!	#NULL!	#NULL!	#NULL!	#NULL!	#NULL!	#NULL!	#NULL!	#NULL!	#NULL!	#NULL!	#NULL!	#NULL!	#NULL!	#NULL!	#NULL!	#NULL!
2000	22	9	2	5	4/29/2015 7:00:52 PM	1	1	0	2	1	2	2	2	3	4	1	5	2	5	3	2	3	2	4	4	4	2	4	2	3	1	4	3	2	5	5	3	5	2	4	1	3	2	3	4	3	3.5	3	2.6
2001	22	9	2	5	4/30/2015 4:07:30 PM	1	1	0	3	2	2	2	2	4	3	1	5	4	3	4	4	4	3	4	3	1	5	4	3	4	3	5	4	3	2	3	3	3	3	3	3	3	3	4	5	4	3.83333	3.71429	3.8
2002	22	9	2	5	4/30/2015 4:19:41 PM	1	1	0	4	#NULL!	1	1	2	1	3	3	3	3	3	3	4	4	3	2	3	3	3	3	5	5	5	4	5	4	2	3	3	2	3	3	3	3	3	3	3	3	3.16667	3.28571	4.6
2004	22	9	2	5	42009.446932870371	1	1	0	2	1	2	2	2	4	5	2	4	2	3	4	4	4	2	4	2	4	2	4	2	4	1	3	3	1	4	2	3	3	2	4	2	3	4	3	2	3	3.66667	2.85714	2.4
2006	22	9	2	5	42068.556319444448	1	1	0	2	1	4	4	1	5	5	5	1	4	5	5	5	4	5	4	4	2	4	5	5	5	2	4	5	5	4	2	4	4	2	4	3	3	2	3	3	3	4.16667	4.42857	4.2
2007	22	9	2	5	42068.792129629626	1	1	0	2	1	3	3	1	3	4	1	5	4	3	4	5	5	3	3	3	2	4	4	4	5	3	5	4	5	3	2	1	2	1	4	1	1	2	4	5	4	4.16667	3.71429	4.4
2008	22	9	2	5	42068.906400462962	1	1	0	3	2	4	4	2	5	5	1	5	3	5	5	4	3	2	5	4	4	2	5	3	5	2	5	4	4	4	1	1	1	3	2	3	2	2	4	5	5	4.5	3.42857	4
2009	23	9	2	1	42099.359837962962	1	1	0	1	1	2	2	2	2	4	1	5	4	5	4	5	4	5	2	4	2	4	3	4	5	5	5	5	4	4	4	3	2	3	4	4	3	4	5	4	5	4.5	3.71429	4.8
2010	22	9	2	5	42099.360775462963	1	1	0	4	#NULL!	2	3	1	3	4	2	4	4	4	5	5	5	4	4	4	2	4	3	4	5	4	4	4	5	3	4	3	4	2	4	2	2	3	4	4	4	4.33333	4	4.4
2011	23	9	2	1	42099.40016203704	1	1	0	1	1	2	2	2	2	5	5	1	4	5	5	5	4	4	4	4	2	4	5	4	5	4	5	5	3	5	2	2	3	1	1	1	3	2	4	3	5	4.16667	4.14286	4.4
2017	22	9	2	5	42343.557291666664	1	1	0	2	1	4	4	1	5	4	4	2	3	4	4	3	4	4	4	2	2	4	2	3	3	3	4	3	4	4	2	2	4	3	2	2	3	4	3	4	4	3.33333	3.28571	3.4
2022	22	9	2	5	5/31/2015 5:51:58 PM	1	1	0	2	1	4	4	2	5	4	2	4	4	3	4	4	4	5	5	4	1	5	5	4	5	3	5	4	4	4	4	3	3	2	4	2	5	2	3	5	5	3.83333	4.57143	4.2
[truncated: 73 more columns]
